# Supplementary material for: The influence of temperature and photoperiod on the timing of brood onset in hibernating honey bee colonies
Source: PeerJ. 2018 May 25;6:e4801. doi: 10.7717/peerj.4801 (PMC5971834; doi:10.7717/peerj.4801)
Supplement: Supplemental Information 1 [file peerj-06-4801-s001.xlsx]

## Sheet: Tabelle1
ID	Date	Day.of.Experiment	Treatment	Temp_regime	Light_regime	Light_phase	Temp_condition	Daylength	delta.daylength	survival	min.combtemp	max.combtemp	amplitude.combtemp	mean.combtemp	min.envtemp	max.envtemp	mean.envtemp	amplitude.envtemp
CCM1	2015-01-26	4	CC	Cold	Constant	short	cold	0.333333	0	1	24.5	29	4.5	26.4375	-3	3.5	0.291667	6.5
CCM1	2015-01-27	5	CC	Cold	Constant	short	cold	0.333333	0	1	22	26.5	4.5	24.8125	-3	3.5	0.25	6.5
CCM1	2015-01-28	6	CC	Cold	Constant	short	cold	0.333333	0	1	25	29	4	26.5	-3	3.5	0.25	6.5
CCM1	2015-01-29	7	CC	Cold	Constant	short	cold	0.333333	0	1	28.5	31	2.5	29.375	-3	4	0.25	7
CCM1	2015-01-30	8	CC	Cold	Constant	short	cold	0.333333	0	1	29.5	31	1.5	30.5625	-3	4	0.333333	7
CCM1	2015-01-31	9	CC	Cold	Constant	short	cold	0.333333	0	1	27	31	4	29.1875	-3	3.5	0.291667	6.5
CCM1	2015-02-01	10	CC	Cold	Constant	short	cold	0.333333	0	1	25	28.5	3.5	27.4375	-3	3.5	0.25	6.5
CCM1	2015-02-02	11	CC	Cold	Constant	short	cold	0.333333	0	1	26	28.5	2.5	27.3125	-3	3.5	0.25	6.5
CCM1	2015-02-03	12	CC	Cold	Constant	short	cold	0.333333	0	1	28	31.5	3.5	30.4375	-3	3.5	0.25	6.5
CCM1	2015-02-04	13	CC	Cold	Constant	short	cold	0.333333	0	1	26	31	5	28.625	-3	3.5	0.208333	6.5
CCM1	2015-02-05	14	CC	Cold	Constant	short	cold	0.333333	0	1	28	31	3	29.4375	-3	3.5	0.208333	6.5
CCM1	2015-02-06	15	CC	Cold	Constant	short	cold	0.333333	0	1	29	31	2	30.125	-3	3.5	0.25	6.5
CCM1	2015-02-07	16	CC	Cold	Constant	short	cold	0.333333	0	1	30	31.5	1.5	30.75	-3	3.5	0.25	6.5
CCM1	2015-02-08	17	CC	Cold	Constant	short	cold	0.333333	0	1	30	32	2	30.8125	-3	3.5	0.208333	6.5
CCM1	2015-02-09	18	CC	Cold	Constant	short	cold	0.333333	0	1	30	31.5	1.5	30.6875	-3	3.5	0.208333	6.5
CCM1	2015-02-10	19	CC	Cold	Constant	short	cold	0.333333	0	1	31	32	1	31.5625	-3	3.5	0.208333	6.5
CCM1	2015-02-11	20	CC	Cold	Constant	short	cold	0.333333	0	1	31	32	1	31.625	-3	3.5	0.208333	6.5
CCM1	2015-02-12	21	CC	Cold	Constant	short	cold	0.333333	0	1	31	32	1	31.5	-3	3.5	0.208333	6.5
CCM1	2015-02-13	22	CC	Cold	Constant	short	cold	0.333333	0	1	30	32	2	31.0625	-3	3.5	0.208333	6.5
CCM1	2015-02-14	23	CC	Cold	Constant	short	cold	0.333333	0	1	30.5	31.5	1	31.125	-3	3.5	0.208333	6.5
CCM1	2015-02-15	24	CC	Cold	Constant	short	cold	0.333333	0	1	30	31	1	30.5625	-3	3.5	0.208333	6.5
CCM1	2015-02-16	25	CC	Cold	Constant	short	cold	0.333333	0	1	30.5	33	2.5	31.8125	-3	3.5	0.208333	6.5
CCM1	2015-02-17	26	CC	Cold	Constant	short	cold	0.333333	0	1	31	32	1	31.5625	-3	3.5	0.208333	6.5
CCM1	2015-02-18	27	CC	Cold	Constant	short	cold	0.333333	0	1	31.5	32.5	1	31.9375	-3	3.5	0.208333	6.5
CCM1	2015-02-19	28	CC	Cold	Constant	short	cold	0.333333	0	1	31.5	32.5	1	32.1875	-3	3.5	0.208333	6.5
CCM1	2015-02-20	29	CC	Cold	Constant	short	cold	0.333333	0	1	32	33.5	1.5	32.75	-3	3.5	0.208333	6.5
CCM1	2015-02-21	30	CC	Cold	Constant	short	cold	0.333333	0	1	32.5	33	0.5	32.75	-3	3.5	0.208333	6.5
CCM1	2015-02-22	31	CC	Cold	Constant	short	cold	0.333333	0	1	32.5	33	0.5	32.75	-3	3.5	0.208333	6.5
CCM1	2015-02-23	32	CC	Cold	Constant	short	cold	0.333333	0	1	32.5	33	0.5	32.75	-3	3.5	0.208333	6.5
CCM1	2015-02-24	33	CC	Cold	Constant	short	cold	0.333333	0	1	32.5	33	0.5	32.6875	-3	3.5	0.208333	6.5
CCM1	2015-02-25	34	CC	Cold	Constant	short	cold	0.333333	0	1	32.5	33	0.5	32.8125	-3	3.5	0.208333	6.5
CCM1	2015-02-26	35	CC	Cold	Constant	short	cold	0.333333	0	1	32.5	33.5	1	33	-3	3.5	0.333333	6.5
CCM1	2015-02-27	36	CC	Cold	Constant	short	cold	0.333333	0	1	32.5	33	0.5	32.9375	-3	3.5	0.208333	6.5
CCM1	2015-02-28	37	CC	Cold	Constant	short	cold	0.333333	0	1	33	33.5	0.5	33.125	-3	3.5	0.208333	6.5
CCM1	2015-03-01	38	CC	Cold	Constant	short	cold	0.333333	0	1	33	34	1	33.375	-3	3.5	0.208333	6.5
CCM1	2015-03-02	39	CC	Cold	Constant	short	cold	0.333333	0	1	33	33.5	0.5	33.375	-3	3.5	0.208333	6.5
CCM1	2015-03-03	40	CC	Cold	Constant	short	cold	0.333333	0	1	33	34	1	33.4375	-3	3.5	0.208333	6.5
CCM1	2015-03-04	41	CC	Cold	Constant	short	cold	0.333333	0	1	33	33.5	0.5	33.4375	-3	3.5	0.208333	6.5
CCM1	2015-03-05	42	CC	Cold	Constant	short	cold	0.333333	0	1	33.5	33.5	0	33.5	-3	3.5	0.208333	6.5
CCM1	2015-03-06	43	CC	Cold	Constant	short	cold	0.333333	0	1	33.5	33.5	0	33.5	-3	3.5	0.208333	6.5
CCM1	2015-03-07	44	CC	Cold	Constant	short	cold	0.333333	0	1	33.5	34	0.5	33.625	-3	3.5	0.208333	6.5
CCM1	2015-03-08	45	CC	Cold	Constant	short	cold	0.333333	0	1	33.5	34	0.5	33.75	-3	3.5	0.208333	6.5
CCM1	2015-03-09	46	CC	Cold	Constant	short	cold	0.333333	0	1	33.5	33.5	0	33.5	-3	3.5	0.208333	6.5
CCM1	2015-03-10	47	CC	Cold	Constant	short	cold2	0.333333	0	1	33.5	34	0.5	33.8125	-3	3.5	0.208333	6.5
CCM1	2015-03-11	48	CC	Cold	Constant	short	cold2	0.333333	0	1	33.5	34	0.5	33.875	-3	3.5	0.208333	6.5
CCM1	2015-03-12	49	CC	Cold	Constant	short	cold2	0.333333	0	1	33.5	34	0.5	33.8125	-3	3.5	0.208333	6.5
CCM1	2015-03-13	50	CC	Cold	Constant	short	cold2	0.333333	0	1	33	34	1	33.75	-3	3.5	0.208333	6.5
CCM1	2015-03-14	51	CC	Cold	Constant	short	cold2	0.333333	0	1	33.5	34	0.5	33.8125	-3	3.5	0.208333	6.5
CCM1	2015-03-15	52	CC	Cold	Constant	short	cold2	0.333333	0	1	33.5	34	0.5	33.75	-3	3.5	0.208333	6.5
CCM1	2015-03-16	53	CC	Cold	Constant	short	cold2	0.333333	0	1	33.5	34	0.5	33.75	-3	3.5	0.208333	6.5
CCM1	2015-03-17	54	CC	Cold	Constant	short	cold2	0.333333	0	1	33.5	33.5	0	33.5	-3	3.5	0.208333	6.5
CCM1	2015-03-18	55	CC	Cold	Constant	short	cold2	0.333333	0	1	33.5	33.5	0	33.5	-3	3.5	0.208333	6.5
CCM1	2015-03-19	56	CC	Cold	Constant	short	cold2	0.333333	0	1	33	33.5	0.5	33.125	-3	3.5	0.25	6.5
CCM1	2015-03-20	57	CC	Cold	Constant	short	cold2	0.333333	0	1	32.5	33.5	1	33.0625	-3	3.5	0.25	6.5
CCM1	2015-03-21	58	CC	Cold	Constant	short	cold2	0.333333	0	1	32	33.5	1.5	32.9375	-3	3.5	0.25	6.5
CCM1	2015-03-22	59	CC	Cold	Constant	short	cold2	0.333333	0	1	32.5	33.5	1	33.1875	-3	3.5	0.291667	6.5
CCM1	2015-03-23	60	CC	Cold	Constant	short	cold2	0.333333	0	1	32.5	33.5	1	33.0625	-3	3.5	0.291667	6.5
CCM1	2015-03-24	61	CC	Cold	Constant	short	cold2	0.333333	0	1	32	33	1	32.8125	-3	3.5	0.291667	6.5
CCM1	2015-03-25	62	CC	Cold	Constant	short	cold2	0.333333	0	1	32	33	1	32.8125	-3	3.5	0.25	6.5
CCM1	2015-03-26	63	CC	Cold	Constant	short	cold2	0.333333	0	1	32.5	33	0.5	32.8125	-3	3.5	0.291667	6.5
CCM1	2015-03-27	64	CC	Cold	Constant	short	cold2	0.333333	0	1	31.5	33	1.5	32.375	-3	3.5	0.25	6.5
CCM1	2015-03-28	65	CC	Cold	Constant	short	cold2	0.333333	0	1	32	33	1	32.375	-3	3.5	0.291667	6.5
CCM1	2015-03-29	66	CC	Cold	Constant	short	cold2	0.333333	0	1	30.5	33.5	3	32.25	-3	3.5	0.291667	6.5
CCM1	2015-03-30	67	CC	Cold	Constant	short	cold2	0.333333	0	1	32	33.5	1.5	32.8125	-3	3.5	0.291667	6.5
CCM1	2015-03-31	68	CC	Cold	Constant	short	cold2	0.333333	0	1	31	32.5	1.5	31.6875	-3	3.5	0.208333	6.5
CCM1	2015-04-01	69	CC	Cold	Constant	short	cold2	0.333333	0	1	31	33	2	31.8125	-3	3.5	0.291667	6.5
CCM1	2015-04-02	70	CC	Cold	Constant	short	cold2	0.333333	0	1	31	32.5	1.5	31.5625	-3	3.5	0.25	6.5
CCM1	2015-04-03	71	CC	Cold	Constant	short	cold2	0.333333	0	1	29	31	2	29.875	-3	3.5	0.25	6.5
CCM1	2015-04-04	72	CC	Cold	Constant	short	cold2	0.333333	0	1	29	31	2	30.25	-3	3.5	0.208333	6.5
CCM1	2015-04-05	73	CC	Cold	Constant	short	cold2	0.333333	0	1	29.5	31	1.5	30.3125	-3	3.5	0.25	6.5
CCM1	2015-04-06	74	CC	Cold	Constant	short	cold2	0.333333	0	1	28.5	30	1.5	29.5625	-3	3.5	0.208333	6.5
CCM1	2015-04-07	75	CC	Cold	Constant	short	cold2	0.333333	0	1	28.5	32.5	4	30.875	-3	3.5	0.291667	6.5
CCM1	2015-04-08	76	CC	Cold	Constant	short	cold2	0.333333	0	1	29.5	32	2.5	30.4375	-3	4	0.208333	7
CCM1	2015-04-09	77	CC	Cold	Constant	short	cold2	0.333333	0	1	28.5	30	1.5	29.125	-3	3.5	0.166667	6.5
CCM1	2015-04-10	78	CC	Cold	Constant	short	cold2	0.333333	0	1	27	31.5	4.5	29.1875	-3	3	-0.333333	6
CCM2	2015-01-26	4	CC	Cold	Constant	short	cold	0.333333	0	0	19	24.5	5.5	20.9375	-3.5	3.5	-0.125	7
CCM2	2015-01-27	5	CC	Cold	Constant	short	cold	0.333333	0	0	19	25	6	21.5	-3.5	3	-0.166667	6.5
CCM2	2015-01-28	6	CC	Cold	Constant	short	cold	0.333333	0	0	15.5	26	10.5	21.25	-3.5	3	-0.166667	6.5
CCM2	2015-01-29	7	CC	Cold	Constant	short	cold	0.333333	0	0	17	26.5	9.5	22.1875	-3.5	3	-0.166667	6.5
CCM2	2015-01-30	8	CC	Cold	Constant	short	cold	0.333333	0	0	16.5	21	4.5	19.125	-3.5	3	-0.166667	6.5
CCM2	2015-01-31	9	CC	Cold	Constant	short	cold	0.333333	0	0	16.5	23.5	7	19.75	-3.5	3	-0.166667	6.5
CCM2	2015-02-01	10	CC	Cold	Constant	short	cold	0.333333	0	0	18	20	2	19	-3.5	3	-0.166667	6.5
CCM2	2015-02-02	11	CC	Cold	Constant	short	cold	0.333333	0	0	14	19.5	5.5	17.375	-3	3	-0.125	6
CCM2	2015-02-03	12	CC	Cold	Constant	short	cold	0.333333	0	0	13.5	20	6.5	16.5625	-3.5	3	-0.166667	6.5
CCM2	2015-02-04	13	CC	Cold	Constant	short	cold	0.333333	0	0	14	22	8	16.25	-3.5	3	-0.166667	6.5
CCM2	2015-02-05	14	CC	Cold	Constant	short	cold	0.333333	0	0	14.5	19.5	5	16.5	-3.5	3	-0.166667	6.5
CCM2	2015-02-06	15	CC	Cold	Constant	short	cold	0.333333	0	0	16	19	3	17.5625	-3.5	3	-0.166667	6.5
CCM2	2015-02-07	16	CC	Cold	Constant	short	cold	0.333333	0	0	17.5	21.5	4	19.9375	-3.5	3	-0.166667	6.5
CCM2	2015-02-08	17	CC	Cold	Constant	short	cold	0.333333	0	0	13.5	20	6.5	16.0625	-3.5	3	-0.166667	6.5
CCM2	2015-02-09	18	CC	Cold	Constant	short	cold	0.333333	0	0	13	17.5	4.5	15.0625	-3.5	3	-0.166667	6.5
CCM2	2015-02-10	19	CC	Cold	Constant	short	cold	0.333333	0	0	11	18	7	13.875	-3.5	3	-0.166667	6.5
CCM2	2015-02-11	20	CC	Cold	Constant	short	cold	0.333333	0	0	12.5	17	4.5	13.9375	-3.5	3	-0.166667	6.5
CCM2	2015-02-12	21	CC	Cold	Constant	short	cold	0.333333	0	0	11	14	3	12.5625	-3.5	3	-0.166667	6.5
CCM2	2015-02-13	22	CC	Cold	Constant	short	cold	0.333333	0	0	10.5	15.5	5	12.6875	-3.5	3	-0.166667	6.5
CCM2	2015-02-14	23	CC	Cold	Constant	short	cold	0.333333	0	0	11.5	14	2.5	12.5625	-3.5	3	-0.166667	6.5
CCM2	2015-02-15	24	CC	Cold	Constant	short	cold	0.333333	0	0	12.5	16	3.5	13.9375	-3.5	3	-0.166667	6.5
CCM2	2015-02-16	25	CC	Cold	Constant	short	cold	0.333333	0	0	10	14.5	4.5	12.5625	-3.5	3	-0.166667	6.5
CCM2	2015-02-17	26	CC	Cold	Constant	short	cold	0.333333	0	0	11	15	4	13	-3.5	3	-0.166667	6.5
CCM2	2015-02-18	27	CC	Cold	Constant	short	cold	0.333333	0	0	12	17	5	13.9375	-3.5	3	-0.166667	6.5
CCM2	2015-02-19	28	CC	Cold	Constant	short	cold	0.333333	0	0	12.5	16.5	4	14.3125	-3.5	3	-0.166667	6.5
CCM2	2015-02-20	29	CC	Cold	Constant	short	cold	0.333333	0	0	13	20.5	7.5	16.4375	-3.5	3	-0.166667	6.5
CCM2	2015-02-21	30	CC	Cold	Constant	short	cold	0.333333	0	0	14	18	4	16.25	-3.5	3	-0.166667	6.5
CCM2	2015-02-22	31	CC	Cold	Constant	short	cold	0.333333	0	0	15	20	5	18	-3.5	3	-0.166667	6.5
CCM2	2015-02-23	32	CC	Cold	Constant	short	cold	0.333333	0	0	16	24.5	8.5	21.4375	-3.5	3	-0.166667	6.5
CCM2	2015-02-24	33	CC	Cold	Constant	short	cold	0.333333	0	0	25	26.5	1.5	25.75	-3.5	3	-0.208333	6.5
CCM2	2015-02-25	34	CC	Cold	Constant	short	cold	0.333333	0	0	25	27	2	26	-3.5	3	-0.208333	6.5
CCM2	2015-02-26	35	CC	Cold	Constant	short	cold	0.333333	0	0	24	27.5	3.5	26.1875	-3.5	3	-0.125	6.5
CCM2	2015-02-27	36	CC	Cold	Constant	short	cold	0.333333	0	0	22.5	28	5.5	25.625	-3.5	3	-0.208333	6.5
CCM2	2015-02-28	37	CC	Cold	Constant	short	cold	0.333333	0	0	21	26	5	23.625	-3.5	3	-0.25	6.5
CCM2	2015-03-01	38	CC	Cold	Constant	short	cold	0.333333	0	0	21.5	27.5	6	24.6875	-3.5	3	-0.208333	6.5
CCM2	2015-03-02	39	CC	Cold	Constant	short	cold	0.333333	0	0	25	33	8	29.1875	-3.5	3	-0.25	6.5
CCM2	2015-03-03	40	CC	Cold	Constant	short	cold	0.333333	0	0	24.5	30	5.5	26.6875	-3.5	3	-0.25	6.5
CCM2	2015-03-04	41	CC	Cold	Constant	short	cold	0.333333	0	0	21.5	27	5.5	24.3125	-3.5	3	-0.208333	6.5
CCM2	2015-03-05	42	CC	Cold	Constant	short	cold	0.333333	0	0	16	21.5	5.5	19.3125	-3.5	3	-0.25	6.5
CCM2	2015-03-06	43	CC	Cold	Constant	short	cold	0.333333	0	0	14.5	20.5	6	18	-3.5	3	-0.25	6.5
CCM2	2015-03-07	44	CC	Cold	Constant	short	cold	0.333333	0	0	16	20	4	17.625	-3.5	3	-0.291667	6.5
CCM2	2015-03-08	45	CC	Cold	Constant	short	cold	0.333333	0	0	16.5	24	7.5	19.5625	-3.5	2.5	-0.458333	6
CCM2	2015-03-09	46	CC	Cold	Constant	short	cold	0.333333	0	0	20.5	31	10.5	26.375	-3.5	3	-0.333333	6.5
CCM2	2015-03-10	47	CC	Cold	Constant	short	cold2	0.333333	0	0	28	30.5	2.5	29.75	-3.5	3	-0.208333	6.5
CCM2	2015-03-11	48	CC	Cold	Constant	short	cold2	0.333333	0	0	24.5	28	3.5	26	-3.5	3	-0.25	6.5
CCM2	2015-03-12	49	CC	Cold	Constant	short	cold2	0.333333	0	0	25.5	28.5	3	26.5625	-3.5	3	-0.166667	6.5
CCM2	2015-03-13	50	CC	Cold	Constant	short	cold2	0.333333	0	0	23	31	8	28.0625	-3.5	3	-0.166667	6.5
CCM2	2015-03-14	51	CC	Cold	Constant	short	cold2	0.333333	0	0	23.5	28.5	5	26.125	-3.5	3	-0.166667	6.5
CCM2	2015-03-15	52	CC	Cold	Constant	short	cold2	0.333333	0	0	23.5	27.5	4	25.6875	-3.5	3	-0.166667	6.5
CCM2	2015-03-16	53	CC	Cold	Constant	short	cold2	0.333333	0	0	21	23.5	2.5	22.5	-3.5	3	-0.166667	6.5
CCM2	2015-03-17	54	CC	Cold	Constant	short	cold2	0.333333	0	0	21.5	24	2.5	22.6875	-3.5	3	-0.166667	6.5
CCM2	2015-03-18	55	CC	Cold	Constant	short	cold2	0.333333	0	0	20	24	4	22.25	-3.5	3	-0.166667	6.5
CCM2	2015-03-19	56	CC	Cold	Constant	short	cold2	0.333333	0	0	19.5	23.5	4	21.875	-3.5	3	-0.166667	6.5
CCM2	2015-03-20	57	CC	Cold	Constant	short	cold2	0.333333	0	0	19	22.5	3.5	20.6875	-3	3	-0.125	6
CCM2	2015-03-21	58	CC	Cold	Constant	short	cold2	0.333333	0	0	19	22.5	3.5	20.625	-3	3	-0.125	6
CCM2	2015-03-22	59	CC	Cold	Constant	short	cold2	0.333333	0	0	16	21	5	18.375	-3	3	-0.125	6
CCM2	2015-03-23	60	CC	Cold	Constant	short	cold2	0.333333	0	0	15.5	23	7.5	18.0625	-3	3	-0.125	6
CCM2	2015-03-24	61	CC	Cold	Constant	short	cold2	0.333333	0	0	13	20	7	17.625	-3	3	-0.125	6
CCM2	2015-03-25	62	CC	Cold	Constant	short	cold2	0.333333	0	0	13.5	20.5	7	16.5	-3.5	3	-0.166667	6.5
CCM2	2015-03-26	63	CC	Cold	Constant	short	cold2	0.333333	0	0	13.5	18	4.5	15.9375	-3	3	-0.125	6
CCM2	2015-03-27	64	CC	Cold	Constant	short	cold2	0.333333	0	0	13	16	3	14.8125	-3	3	-0.125	6
CCM2	2015-03-28	65	CC	Cold	Constant	short	cold2	0.333333	0	0	13	16	3	14.8125	-3	3	-0.125	6
CCM2	2015-03-29	66	CC	Cold	Constant	short	cold2	0.333333	0	0	11.5	14	2.5	12.75	-3	3	-0.125	6
CCM2	2015-03-30	67	CC	Cold	Constant	short	cold2	0.333333	0	0	9.5	14	4.5	12.1875	-3.5	3	-0.166667	6.5
CCM2	2015-03-31	68	CC	Cold	Constant	short	cold2	0.333333	0	0	8	14	6	10.25	-3	3	-0.125	6
CCM2	2015-04-01	69	CC	Cold	Constant	short	cold2	0.333333	0	0	12.5	21	8.5	15.4375	-3.5	3	-0.166667	6.5
CCM2	2015-04-02	70	CC	Cold	Constant	short	cold2	0.333333	0	0	12.5	21	8.5	16.8125	-3	3	-0.125	6
CCM2	2015-04-03	71	CC	Cold	Constant	short	cold2	0.333333	0	0	15	18	3	16.25	-3	3	-0.125	6
CCM2	2015-04-04	72	CC	Cold	Constant	short	cold2	0.333333	0	0	14	18.5	4.5	15.9375	-3	3	-0.125	6
CCM2	2015-04-05	73	CC	Cold	Constant	short	cold2	0.333333	0	0	9.5	14	4.5	11.5625	-3	3	-0.125	6
CCM2	2015-04-06	74	CC	Cold	Constant	short	cold2	0.333333	0	0	9.5	11.5	2	10.4375	-3	3	-0.125	6
CCM2	2015-04-07	75	CC	Cold	Constant	short	cold2	0.333333	0	0	8.5	14	5.5	11.0625	-3	3	-0.125	6
CCM2	2015-04-08	76	CC	Cold	Constant	short	cold2	0.333333	0	0	9	17.5	8.5	13.625	-3	3	-0.125	6
CCM2	2015-04-09	77	CC	Cold	Constant	short	cold2	0.333333	0	0	19	25	6	21.5	-3	3.5	-0.0833333	6.5
CCM2	2015-04-10	78	CC	Cold	Constant	short	cold2	0.333333	0	0	18.5	26	7.5	20.25	-3.5	3	-0.5	6.5
CCP1	2015-01-26	4	CC	Cold	Constant	short	cold	0.333333	0	1	24.5	30.5	6	27.125	-2.5	4	0.5	6.5
CCP1	2015-01-27	5	CC	Cold	Constant	short	cold	0.333333	0	1	27.5	32.5	5	30.5	-2.5	4	0.416667	6.5
CCP1	2015-01-28	6	CC	Cold	Constant	short	cold	0.333333	0	1	27.5	31.5	4	29.375	-2.5	4	0.458333	6.5
CCP1	2015-01-29	7	CC	Cold	Constant	short	cold	0.333333	0	1	28	33	5	30.3125	-2.5	4	0.458333	6.5
CCP1	2015-01-30	8	CC	Cold	Constant	short	cold	0.333333	0	1	28	32.5	4.5	30.3125	-2.5	4	0.416667	6.5
CCP1	2015-01-31	9	CC	Cold	Constant	short	cold	0.333333	0	1	30.5	32.5	2	31.625	-2.5	3.5	0.375	6
CCP1	2015-02-01	10	CC	Cold	Constant	short	cold	0.333333	0	1	30	32	2	31.0625	-2.5	3.5	0.375	6
CCP1	2015-02-02	11	CC	Cold	Constant	short	cold	0.333333	0	1	27.5	32.5	5	30.4375	-2.5	3.5	0.375	6
CCP1	2015-02-03	12	CC	Cold	Constant	short	cold	0.333333	0	1	27.5	32	4.5	29.5	-2.5	3.5	0.375	6
CCP1	2015-02-04	13	CC	Cold	Constant	short	cold	0.333333	0	1	28.5	32	3.5	30.875	-2.5	3.5	0.375	6
CCP1	2015-02-05	14	CC	Cold	Constant	short	cold	0.333333	0	1	29	32	3	30.5	-2.5	3.5	0.375	6
CCP1	2015-02-06	15	CC	Cold	Constant	short	cold	0.333333	0	1	27	31.5	4.5	29.625	-2.5	3.5	0.375	6
CCP1	2015-02-07	16	CC	Cold	Constant	short	cold	0.333333	0	1	27.5	31	3.5	28.625	-2.5	3.5	0.375	6
CCP1	2015-02-08	17	CC	Cold	Constant	short	cold	0.333333	0	1	29	33.5	4.5	30.625	-2.5	3.5	0.375	6
CCP1	2015-02-09	18	CC	Cold	Constant	short	cold	0.333333	0	1	30.5	33.5	3	32	-2.5	3.5	0.375	6
CCP1	2015-02-10	19	CC	Cold	Constant	short	cold	0.333333	0	1	27.5	33.5	6	31.1875	-3	3.5	0.333333	6.5
CCP1	2015-02-11	20	CC	Cold	Constant	short	cold	0.333333	0	1	27.5	33	5.5	30.6875	-2.5	3.5	0.375	6
CCP1	2015-02-12	21	CC	Cold	Constant	short	cold	0.333333	0	1	27	30	3	28.625	-3	3.5	0.333333	6.5
CCP1	2015-02-13	22	CC	Cold	Constant	short	cold	0.333333	0	1	23.5	30	6.5	26.625	-3	3.5	0.333333	6.5
CCP1	2015-02-14	23	CC	Cold	Constant	short	cold	0.333333	0	1	23	32	9	27.125	-3	3.5	0.333333	6.5
CCP1	2015-02-15	24	CC	Cold	Constant	short	cold	0.333333	0	1	25.5	30	4.5	27.5	-3	3.5	0.333333	6.5
CCP1	2015-02-16	25	CC	Cold	Constant	short	cold	0.333333	0	1	23.5	26.5	3	25.1875	-3	3.5	0.333333	6.5
CCP1	2015-02-17	26	CC	Cold	Constant	short	cold	0.333333	0	1	21.5	26	4.5	24	-3	3.5	0.333333	6.5
CCP1	2015-02-18	27	CC	Cold	Constant	short	cold	0.333333	0	1	21	28	7	23.625	-3	3.5	0.333333	6.5
CCP1	2015-02-19	28	CC	Cold	Constant	short	cold	0.333333	0	1	23.5	28	4.5	25.1875	-3	3.5	0.333333	6.5
CCP1	2015-02-20	29	CC	Cold	Constant	short	cold	0.333333	0	1	24.5	31	6.5	27.375	-3	3.5	0.333333	6.5
CCP1	2015-02-21	30	CC	Cold	Constant	short	cold	0.333333	0	1	29	33	4	31.4375	-3	3.5	0.333333	6.5
CCP1	2015-02-22	31	CC	Cold	Constant	short	cold	0.333333	0	1	30.5	32	1.5	31.375	-3	3.5	0.333333	6.5
CCP1	2015-02-23	32	CC	Cold	Constant	short	cold	0.333333	0	1	27	32.5	5.5	31.0625	-3	3.5	0.333333	6.5
CCP1	2015-02-24	33	CC	Cold	Constant	short	cold	0.333333	0	1	30.5	33.5	3	32.1875	-3	3.5	0.333333	6.5
CCP1	2015-02-25	34	CC	Cold	Constant	short	cold	0.333333	0	1	29.5	32.5	3	31.3125	-3	3.5	0.333333	6.5
CCP1	2015-02-26	35	CC	Cold	Constant	short	cold	0.333333	0	1	30	32.5	2.5	31.3125	-3	3.5	0.458333	6.5
CCP1	2015-02-27	36	CC	Cold	Constant	short	cold	0.333333	0	1	29.5	32.5	3	31	-3	4	0.375	7
CCP1	2015-02-28	37	CC	Cold	Constant	short	cold	0.333333	0	1	30.5	33.5	3	32.0625	-3	4	0.375	7
CCP1	2015-03-01	38	CC	Cold	Constant	short	cold	0.333333	0	1	31.5	33.5	2	32.375	-3	4	0.375	7
CCP1	2015-03-02	39	CC	Cold	Constant	short	cold	0.333333	0	1	28	33.5	5.5	31.625	-3	3.5	0.333333	6.5
CCP1	2015-03-03	40	CC	Cold	Constant	short	cold	0.333333	0	1	25	31	6	28.375	-3	4	0.375	7
CCP1	2015-03-04	41	CC	Cold	Constant	short	cold	0.333333	0	1	21.5	30	8.5	25.8125	-3	4	0.375	7
CCP1	2015-03-05	42	CC	Cold	Constant	short	cold	0.333333	0	1	20.5	24	3.5	22.1875	-2.5	4	0.416667	6.5
CCP1	2015-03-06	43	CC	Cold	Constant	short	cold	0.333333	0	1	22.5	24.5	2	23.125	-3	3.5	0.333333	6.5
CCP1	2015-03-07	44	CC	Cold	Constant	short	cold	0.333333	0	1	24	26	2	24.5625	-3	4	0.333333	7
CCP1	2015-03-08	45	CC	Cold	Constant	short	cold	0.333333	0	1	23	28.5	5.5	26.0625	-3	3	0.208333	6
CCP1	2015-03-09	46	CC	Cold	Constant	short	cold	0.333333	0	1	21.5	31.5	10	25.9375	-3	3.5	0.25	6.5
CCP1	2015-03-10	47	CC	Cold	Constant	short	cold2	0.333333	0	1	21	23.5	2.5	22.125	-3	4	0.375	7
CCP1	2015-03-11	48	CC	Cold	Constant	short	cold2	0.333333	0	1	22	27.5	5.5	24.125	-3	4	0.375	7
CCP1	2015-03-12	49	CC	Cold	Constant	short	cold2	0.333333	0	1	20.5	24	3.5	22.0625	-2.5	4	0.416667	6.5
CCP1	2015-03-13	50	CC	Cold	Constant	short	cold2	0.333333	0	1	22.5	25.5	3	24	-2.5	4	0.416667	6.5
CCP1	2015-03-14	51	CC	Cold	Constant	short	cold2	0.333333	0	1	19.5	24	4.5	21.75	-2.5	4	0.416667	6.5
CCP1	2015-03-15	52	CC	Cold	Constant	short	cold2	0.333333	0	1	21	25	4	22.3125	-2.5	4	0.416667	6.5
CCP1	2015-03-16	53	CC	Cold	Constant	short	cold2	0.333333	0	1	19	25.5	6.5	21.375	-2.5	4	0.416667	6.5
CCP1	2015-03-17	54	CC	Cold	Constant	short	cold2	0.333333	0	1	22.5	28.5	6	25.4375	-2.5	4	0.416667	6.5
CCP1	2015-03-18	55	CC	Cold	Constant	short	cold2	0.333333	0	1	28	32	4	30.1875	-2.5	4	0.416667	6.5
CCP1	2015-03-19	56	CC	Cold	Constant	short	cold2	0.333333	0	1	31.5	33.5	2	32.25	-2.5	4	0.416667	6.5
CCP1	2015-03-20	57	CC	Cold	Constant	short	cold2	0.333333	0	1	30.5	33.5	3	32	-2.5	4	0.416667	6.5
CCP1	2015-03-21	58	CC	Cold	Constant	short	cold2	0.333333	0	1	29	33	4	32.125	-2.5	4	0.416667	6.5
CCP1	2015-03-22	59	CC	Cold	Constant	short	cold2	0.333333	0	1	27	33.5	6.5	31.125	-2.5	4	0.416667	6.5
CCP1	2015-03-23	60	CC	Cold	Constant	short	cold2	0.333333	0	1	29	33.5	4.5	31.25	-2.5	4	0.416667	6.5
CCP1	2015-03-24	61	CC	Cold	Constant	short	cold2	0.333333	0	1	28	32.5	4.5	30.625	-2.5	4	0.416667	6.5
CCP1	2015-03-25	62	CC	Cold	Constant	short	cold2	0.333333	0	1	25	31	6	28.3125	-2.5	4	0.416667	6.5
CCP1	2015-03-26	63	CC	Cold	Constant	short	cold2	0.333333	0	1	23.5	31	7.5	28	-2.5	4	0.416667	6.5
CCP1	2015-03-27	64	CC	Cold	Constant	short	cold2	0.333333	0	1	24	27	3	25.4375	-2.5	4	0.416667	6.5
CCP1	2015-03-28	65	CC	Cold	Constant	short	cold2	0.333333	0	1	24	30.5	6.5	27.3125	-2.5	4	0.416667	6.5
CCP1	2015-03-29	66	CC	Cold	Constant	short	cold2	0.333333	0	1	27.5	31	3.5	29.3125	-2.5	4	0.458333	6.5
CCP1	2015-03-30	67	CC	Cold	Constant	short	cold2	0.333333	0	1	27.5	31	3.5	29.25	-2.5	4	0.416667	6.5
CCP1	2015-03-31	68	CC	Cold	Constant	short	cold2	0.333333	0	1	22.5	31.5	9	26.75	-2.5	4	0.416667	6.5
CCP1	2015-04-01	69	CC	Cold	Constant	short	cold2	0.333333	0	1	25	31.5	6.5	27.875	-2.5	3.5	0.375	6
CCP1	2015-04-02	70	CC	Cold	Constant	short	cold2	0.333333	0	1	23	29	6	25.0625	-2.5	4	0.416667	6.5
CCP1	2015-04-03	71	CC	Cold	Constant	short	cold2	0.333333	0	1	22	28	6	25.375	-2.5	4	0.416667	6.5
CCP1	2015-04-04	72	CC	Cold	Constant	short	cold2	0.333333	0	1	28	32.5	4.5	29.6875	-2.5	4	0.416667	6.5
CCP1	2015-04-05	73	CC	Cold	Constant	short	cold2	0.333333	0	1	30.5	33.5	3	32.25	-2.5	4	0.416667	6.5
CCP1	2015-04-06	74	CC	Cold	Constant	short	cold2	0.333333	0	1	27.5	33	5.5	29.75	-2.5	4	0.416667	6.5
CCP1	2015-04-07	75	CC	Cold	Constant	short	cold2	0.333333	0	1	29	32.5	3.5	31.5625	-2.5	3.5	0.375	6
CCP1	2015-04-08	76	CC	Cold	Constant	short	cold2	0.333333	0	1	30	32	2	31.25	-2.5	3.5	0.375	6
CCP1	2015-04-09	77	CC	Cold	Constant	short	cold2	0.333333	0	1	29.5	33	3.5	30.875	-2.5	4	0.416667	6.5
CCP1	2015-04-10	78	CC	Cold	Constant	short	cold2	0.333333	0	1	29	33	4	31.125	-2.5	4	0.125	6.5
CCP2	2015-01-26	4	CC	Cold	Constant	short	cold	0.333333	0	1	23	32	9	29.375	-3	3.5	0.166667	6.5
CCP2	2015-01-27	5	CC	Cold	Constant	short	cold	0.333333	0	1	22.5	33	10.5	29.4375	-3	3.5	0.166667	6.5
CCP2	2015-01-28	6	CC	Cold	Constant	short	cold	0.333333	0	1	20.5	33.5	13	29.4375	-3	3.5	0.166667	6.5
CCP2	2015-01-29	7	CC	Cold	Constant	short	cold	0.333333	0	1	23	33.5	10.5	28.75	-3	3.5	0.166667	6.5
CCP2	2015-01-30	8	CC	Cold	Constant	short	cold	0.333333	0	1	23	32.5	9.5	29.1875	-3	3.5	0.166667	6.5
CCP2	2015-01-31	9	CC	Cold	Constant	short	cold	0.333333	0	1	24.5	32.5	8	28.875	-3	3.5	0.166667	6.5
CCP2	2015-02-01	10	CC	Cold	Constant	short	cold	0.333333	0	1	25	32.5	7.5	29.375	-3	3.5	0.166667	6.5
CCP2	2015-02-02	11	CC	Cold	Constant	short	cold	0.333333	0	1	25.5	33	7.5	28.8125	-3	3.5	0.166667	6.5
CCP2	2015-02-03	12	CC	Cold	Constant	short	cold	0.333333	0	1	20.5	31	10.5	27.0625	-3	3.5	0.166667	6.5
CCP2	2015-02-04	13	CC	Cold	Constant	short	cold	0.333333	0	1	21	32	11	28.75	-3	3.5	0.125	6.5
CCP2	2015-02-05	14	CC	Cold	Constant	short	cold	0.333333	0	1	24.5	32	7.5	28.3125	-3	3.5	0.166667	6.5
CCP2	2015-02-06	15	CC	Cold	Constant	short	cold	0.333333	0	1	23.5	30.5	7	27.125	-3	3.5	0.166667	6.5
CCP2	2015-02-07	16	CC	Cold	Constant	short	cold	0.333333	0	1	23.5	32.5	9	28.9375	-3	3.5	0.166667	6.5
CCP2	2015-02-08	17	CC	Cold	Constant	short	cold	0.333333	0	1	26	31.5	5.5	28.4375	-3	3.5	0.125	6.5
CCP2	2015-02-09	18	CC	Cold	Constant	short	cold	0.333333	0	1	25.5	32.5	7	29.5625	-3	3.5	0.166667	6.5
CCP2	2015-02-10	19	CC	Cold	Constant	short	cold	0.333333	0	1	27.5	32	4.5	30.5625	-3	3.5	0.125	6.5
CCP2	2015-02-11	20	CC	Cold	Constant	short	cold	0.333333	0	1	23	32.5	9.5	26.8125	-3	3.5	0.125	6.5
CCP2	2015-02-12	21	CC	Cold	Constant	short	cold	0.333333	0	1	25	31.5	6.5	28.9375	-3	3.5	0.125	6.5
CCP2	2015-02-13	22	CC	Cold	Constant	short	cold	0.333333	0	1	23.5	31	7.5	27.75	-3	3.5	0.166667	6.5
CCP2	2015-02-14	23	CC	Cold	Constant	short	cold	0.333333	0	1	24.5	33	8.5	28.8125	-3	3.5	0.166667	6.5
CCP2	2015-02-15	24	CC	Cold	Constant	short	cold	0.333333	0	1	20.5	32	11.5	25.75	-3	3.5	0.125	6.5
CCP2	2015-02-16	25	CC	Cold	Constant	short	cold	0.333333	0	1	24	30.5	6.5	27.25	-3	3.5	0.125	6.5
CCP2	2015-02-17	26	CC	Cold	Constant	short	cold	0.333333	0	1	25.5	31.5	6	28.5	-3	3.5	0.125	6.5
CCP2	2015-02-18	27	CC	Cold	Constant	short	cold	0.333333	0	1	26.5	32	5.5	28.4375	-3	3.5	0.166667	6.5
CCP2	2015-02-19	28	CC	Cold	Constant	short	cold	0.333333	0	1	22	32.5	10.5	27.1875	-3	3.5	0.125	6.5
CCP2	2015-02-20	29	CC	Cold	Constant	short	cold	0.333333	0	1	21	32	11	26.625	-3	3.5	0.166667	6.5
CCP2	2015-02-21	30	CC	Cold	Constant	short	cold	0.333333	0	1	24	32	8	27.75	-3	3.5	0.125	6.5
CCP2	2015-02-22	31	CC	Cold	Constant	short	cold	0.333333	0	1	24	31	7	27.875	-3	3.5	0.125	6.5
CCP2	2015-02-23	32	CC	Cold	Constant	short	cold	0.333333	0	1	22.5	32.5	10	25.5	-3	3.5	0.125	6.5
CCP2	2015-02-24	33	CC	Cold	Constant	short	cold	0.333333	0	1	21.5	32.5	11	25.4375	-3	3.5	0.125	6.5
CCP2	2015-02-25	34	CC	Cold	Constant	short	cold	0.333333	0	1	23.5	32	8.5	27.4375	-3	3.5	0.125	6.5
CCP2	2015-02-26	35	CC	Cold	Constant	short	cold	0.333333	0	1	25	31	6	28.0625	-3	3.5	0.291667	6.5
CCP2	2015-02-27	36	CC	Cold	Constant	short	cold	0.333333	0	1	26	31.5	5.5	29	-3	3.5	0.166667	6.5
CCP2	2015-02-28	37	CC	Cold	Constant	short	cold	0.333333	0	1	23	32	9	26.5	-3	3.5	0.166667	6.5
CCP2	2015-03-01	38	CC	Cold	Constant	short	cold	0.333333	0	1	25	32	7	28.5625	-3	3.5	0.166667	6.5
CCP2	2015-03-02	39	CC	Cold	Constant	short	cold	0.333333	0	1	23	30	7	27.625	-3	3.5	0.166667	6.5
CCP2	2015-03-03	40	CC	Cold	Constant	short	cold	0.333333	0	1	26.5	30.5	4	28.1875	-3	3.5	0.166667	6.5
CCP2	2015-03-04	41	CC	Cold	Constant	short	cold	0.333333	0	1	27	30.5	3.5	28.25	-3	3.5	0.166667	6.5
CCP2	2015-03-05	42	CC	Cold	Constant	short	cold	0.333333	0	1	26.5	32.5	6	29.6875	-3	3.5	0.125	6.5
CCP2	2015-03-06	43	CC	Cold	Constant	short	cold	0.333333	0	1	26.5	32.5	6	28.75	-3	3.5	0.125	6.5
CCP2	2015-03-07	44	CC	Cold	Constant	short	cold	0.333333	0	1	26.5	31	4.5	29.0625	-3	3.5	0.125	6.5
CCP2	2015-03-08	45	CC	Cold	Constant	short	cold	0.333333	0	1	28.5	32.5	4	30.375	-3	3	0	6
CCP2	2015-03-09	46	CC	Cold	Constant	short	cold	0.333333	0	1	26.5	33	6.5	30.25	-3	3	0	6
CCP2	2015-03-10	47	CC	Cold	Constant	short	cold2	0.333333	0	1	28	33	5	30.875	-3	3.5	0.166667	6.5
CCP2	2015-03-11	48	CC	Cold	Constant	short	cold2	0.333333	0	1	28	32.5	4.5	30.3125	-3	3.5	0.166667	6.5
CCP2	2015-03-12	49	CC	Cold	Constant	short	cold2	0.333333	0	1	29	32.5	3.5	31.25	-3	3.5	0.166667	6.5
CCP2	2015-03-13	50	CC	Cold	Constant	short	cold2	0.333333	0	1	28.5	33	4.5	30.75	-3	3.5	0.166667	6.5
CCP2	2015-03-14	51	CC	Cold	Constant	short	cold2	0.333333	0	1	29.5	33.5	4	31.375	-3	3.5	0.166667	6.5
CCP2	2015-03-15	52	CC	Cold	Constant	short	cold2	0.333333	0	1	28.5	32.5	4	30.5	-3	3.5	0.166667	6.5
CCP2	2015-03-16	53	CC	Cold	Constant	short	cold2	0.333333	0	1	28	31	3	29.75	-3	3.5	0.166667	6.5
CCP2	2015-03-17	54	CC	Cold	Constant	short	cold2	0.333333	0	1	28	32.5	4.5	30.3125	-3	3.5	0.166667	6.5
CCP2	2015-03-18	55	CC	Cold	Constant	short	cold2	0.333333	0	1	28	31.5	3.5	29.8125	-3	3.5	0.166667	6.5
CCP2	2015-03-19	56	CC	Cold	Constant	short	cold2	0.333333	0	1	28.5	32.5	4	30.4375	-3	3.5	0.166667	6.5
CCP2	2015-03-20	57	CC	Cold	Constant	short	cold2	0.333333	0	1	27.5	32	4.5	30.625	-3	3.5	0.166667	6.5
CCP2	2015-03-21	58	CC	Cold	Constant	short	cold2	0.333333	0	1	27	32.5	5.5	29.75	-3	3.5	0.166667	6.5
CCP2	2015-03-22	59	CC	Cold	Constant	short	cold2	0.333333	0	1	27.5	31.5	4	29.0625	-3	3.5	0.166667	6.5
CCP2	2015-03-23	60	CC	Cold	Constant	short	cold2	0.333333	0	1	27.5	31.5	4	29.8125	-3	3.5	0.166667	6.5
CCP2	2015-03-24	61	CC	Cold	Constant	short	cold2	0.333333	0	1	29	32	3	30.0625	-3	3.5	0.166667	6.5
CCP2	2015-03-25	62	CC	Cold	Constant	short	cold2	0.333333	0	1	28.5	32	3.5	30.1875	-3	3.5	0.166667	6.5
CCP2	2015-03-26	63	CC	Cold	Constant	short	cold2	0.333333	0	1	28.5	30.5	2	29.6875	-3	3.5	0.166667	6.5
CCP2	2015-03-27	64	CC	Cold	Constant	short	cold2	0.333333	0	1	28	32	4	30.375	-3	3.5	0.166667	6.5
CCP2	2015-03-28	65	CC	Cold	Constant	short	cold2	0.333333	0	1	30	33	3	31.1875	-3	3.5	0.166667	6.5
CCP2	2015-03-29	66	CC	Cold	Constant	short	cold2	0.333333	0	1	30	32.5	2.5	31.4375	-3	3.5	0.166667	6.5
CCP2	2015-03-30	67	CC	Cold	Constant	short	cold2	0.333333	0	1	30.5	33	2.5	32	-3	3.5	0.166667	6.5
CCP2	2015-03-31	68	CC	Cold	Constant	short	cold2	0.333333	0	1	29.5	32	2.5	30.625	-3	3.5	0.125	6.5
CCP2	2015-04-01	69	CC	Cold	Constant	short	cold2	0.333333	0	1	28	33	5	30.6875	-3	3.5	0.166667	6.5
CCP2	2015-04-02	70	CC	Cold	Constant	short	cold2	0.333333	0	1	29	32	3	31.1875	-3	3.5	0.166667	6.5
CCP2	2015-04-03	71	CC	Cold	Constant	short	cold2	0.333333	0	1	30	32.5	2.5	31.4375	-3	3.5	0.166667	6.5
CCP2	2015-04-04	72	CC	Cold	Constant	short	cold2	0.333333	0	1	28.5	33.5	5	30.9375	-3	3.5	0.166667	6.5
CCP2	2015-04-05	73	CC	Cold	Constant	short	cold2	0.333333	0	1	30.5	33.5	3	31.6875	-3	3.5	0.166667	6.5
CCP2	2015-04-06	74	CC	Cold	Constant	short	cold2	0.333333	0	1	22	32.5	10.5	27.5625	-3	3.5	0.166667	6.5
CCP2	2015-04-07	75	CC	Cold	Constant	short	cold2	0.333333	0	1	17.5	32.5	15	24.375	-3	3.5	0.166667	6.5
CCP2	2015-04-08	76	CC	Cold	Constant	short	cold2	0.333333	0	1	23.5	30.5	7	27.125	-3	3.5	0.166667	6.5
CCP2	2015-04-09	77	CC	Cold	Constant	short	cold2	0.333333	0	1	22	28	6	25.625	-3	3.5	0.166667	6.5
CCP2	2015-04-10	78	CC	Cold	Constant	short	cold2	0.333333	0	1	23	32.5	9.5	27.125	-3	3.5	-0.25	6.5
CPM1	2015-01-26	4	CP	Cold	Periodic	rising	cold	0.355556	0.00740741	1	33.5	34	0.5	33.9375	-2.5	3.5	0.375	6
CPM1	2015-01-27	5	CP	Cold	Periodic	rising	cold	0.362963	0.00740741	1	34	34	0	34	-2.5	3.5	0.375	6
CPM1	2015-01-28	6	CP	Cold	Periodic	rising	cold	0.37037	0.00740741	1	33.5	34.5	1	34	-2.5	3.5	0.375	6
CPM1	2015-01-29	7	CP	Cold	Periodic	rising	cold	0.377778	0.00740741	1	34	34.5	0.5	34.1875	-2.5	3.5	0.416667	6
CPM1	2015-01-30	8	CP	Cold	Periodic	rising	cold	0.385185	0.00740741	1	34	34.5	0.5	34.375	-2.5	3.5	0.375	6
CPM1	2015-01-31	9	CP	Cold	Periodic	rising	cold	0.392593	0.00740741	1	34	34.5	0.5	34.1875	-2.5	3.5	0.375	6
CPM1	2015-02-01	10	CP	Cold	Periodic	rising	cold	0.4	0.00740741	1	34	34.5	0.5	34.375	-2.5	3.5	0.375	6
CPM1	2015-02-02	11	CP	Cold	Periodic	rising	cold	0.407407	0.00740741	1	34	34.5	0.5	34.4375	-2.5	3.5	0.375	6
CPM1	2015-02-03	12	CP	Cold	Periodic	rising	cold	0.414815	0.00740741	1	34.5	34.5	0	34.5	-3	3.5	0.333333	6.5
CPM1	2015-02-04	13	CP	Cold	Periodic	rising	cold	0.422222	0.00740741	1	34.5	34.5	0	34.5	-3	3.5	0.333333	6.5
CPM1	2015-02-05	14	CP	Cold	Periodic	rising	cold	0.42963	0.00740741	1	34	34.5	0.5	34.4375	-3	3.5	0.333333	6.5
CPM1	2015-02-06	15	CP	Cold	Periodic	rising	cold	0.437037	0.00740741	1	34.5	34.5	0	34.5	-3	3.5	0.333333	6.5
CPM1	2015-02-07	16	CP	Cold	Periodic	rising	cold	0.444444	0.00740741	1	34.5	35	0.5	34.6875	-3	3.5	0.333333	6.5
CPM1	2015-02-08	17	CP	Cold	Periodic	rising	cold	0.451852	0.00740741	1	34.5	35	0.5	34.5625	-3	3.5	0.333333	6.5
CPM1	2015-02-09	18	CP	Cold	Periodic	rising	cold	0.459259	0.00740741	1	34.5	35	0.5	34.75	-3	3.5	0.333333	6.5
CPM1	2015-02-10	19	CP	Cold	Periodic	rising	cold	0.466667	0.00740741	1	34.5	35	0.5	34.75	-3	3.5	0.333333	6.5
CPM1	2015-02-11	20	CP	Cold	Periodic	rising	cold	0.474074	0.00740741	1	34.5	35	0.5	34.875	-3	3.5	0.333333	6.5
CPM1	2015-02-12	21	CP	Cold	Periodic	rising	cold	0.481481	0.00740741	1	35	35	0	35	-3	3.5	0.333333	6.5
CPM1	2015-02-13	22	CP	Cold	Periodic	rising	cold	0.488889	0.00740741	1	35	35	0	35	-3	3.5	0.333333	6.5
CPM1	2015-02-14	23	CP	Cold	Periodic	rising	cold	0.496296	0.00740741	1	34.5	35	0.5	34.9375	-3	3.5	0.333333	6.5
CPM1	2015-02-15	24	CP	Cold	Periodic	rising	cold	0.503704	0.00740741	1	34.5	35	0.5	34.625	-3	3.5	0.333333	6.5
CPM1	2015-02-16	25	CP	Cold	Periodic	rising	cold	0.511111	0.00740741	1	34.5	35	0.5	34.875	-3	3.5	0.333333	6.5
CPM1	2015-02-17	26	CP	Cold	Periodic	rising	cold	0.518519	0.00740741	1	34.5	35	0.5	34.75	-3	3.5	0.333333	6.5
CPM1	2015-02-18	27	CP	Cold	Periodic	rising	cold	0.525926	0.00740741	1	34.5	35	0.5	34.6875	-3	3.5	0.333333	6.5
CPM1	2015-02-19	28	CP	Cold	Periodic	rising	cold	0.533333	0.00740741	1	34.5	35	0.5	34.8125	-3	3.5	0.333333	6.5
CPM1	2015-02-20	29	CP	Cold	Periodic	rising	cold	0.540741	0.00740741	1	34.5	35	0.5	34.875	-3	4	0.458333	7
CPM1	2015-02-21	30	CP	Cold	Periodic	rising	cold	0.548148	0.00740741	1	35	35	0	35	-3	3.5	0.291667	6.5
CPM1	2015-02-22	31	CP	Cold	Periodic	rising	cold	0.555556	0.00740741	1	35	35	0	35	-3	3.5	0.208333	6.5
CPM1	2015-02-23	32	CP	Cold	Periodic	rising	cold	0.562963	0.00740741	1	34.5	35	0.5	34.6875	-3	3.5	0.208333	6.5
CPM1	2015-02-24	33	CP	Cold	Periodic	rising	cold	0.57037	0.00740741	1	34.5	35	0.5	34.625	-3	3.5	0.333333	6.5
CPM1	2015-02-25	34	CP	Cold	Periodic	rising	cold	0.577778	0.00740741	1	34.5	34.5	0	34.5	-3	3.5	0.333333	6.5
CPM1	2015-02-26	35	CP	Cold	Periodic	rising	cold	0.585185	0.00740741	1	34.5	35	0.5	34.625	-3	3.5	0.5	6.5
CPM1	2015-02-27	36	CP	Cold	Periodic	rising	cold	0.592593	0.00740741	1	34.5	34.5	0	34.5	-2.5	3.5	0.416667	6
CPM1	2015-02-28	37	CP	Cold	Periodic	rising	cold	0.6	0.00740741	1	34	34.5	0.5	34.375	-2.5	3.5	0.416667	6
CPM1	2015-03-01	38	CP	Cold	Periodic	rising	cold	0.607407	0.00740741	1	34	34.5	0.5	34.375	-2.5	3.5	0.416667	6
CPM1	2015-03-02	39	CP	Cold	Periodic	rising	cold	0.614815	0.00740741	1	34	34.5	0.5	34.25	-3	3.5	0.458333	6.5
CPM1	2015-03-03	40	CP	Cold	Periodic	rising	cold	0.622222	0.00740741	1	34	34.5	0.5	34.4375	-2.5	3.5	0.416667	6
CPM1	2015-03-04	41	CP	Cold	Periodic	rising	cold	0.62963	0.00740741	1	34	34.5	0.5	34.25	-2.5	3.5	0.416667	6
CPM1	2015-03-05	42	CP	Cold	Periodic	rising	cold	0.637037	0.00740741	1	34	34.5	0.5	34.3125	-2.5	3.5	0.5	6
CPM1	2015-03-06	43	CP	Cold	Periodic	rising	cold	0.644444	0.00740741	1	34	34.5	0.5	34.3125	-2.5	3.5	0.416667	6
CPM1	2015-03-07	44	CP	Cold	Periodic	rising	cold	0.651852	0.00740741	1	33.5	34.5	1	34.125	-2.5	3.5	0.416667	6
CPM1	2015-03-08	45	CP	Cold	Periodic	rising	cold	0.659259	0.00740741	1	33.5	34	0.5	33.8125	-2.5	3.5	0.458333	6
CPM1	2015-03-09	46	CP	Cold	Periodic	rising	cold	0.666667	0.00740741	1	34	34	0	34	-2.5	3.5	0.458333	6
CPM1	2015-03-10	47	CP	Cold	Periodic	decreasing	cold2	0.659259	-0.00740741	1	33.5	34	0.5	33.8125	-2.5	3.5	0.458333	6
CPM1	2015-03-11	48	CP	Cold	Periodic	decreasing	cold2	0.651852	-0.00740741	1	33	34	1	33.5	-2.5	3.5	0.458333	6
CPM1	2015-03-12	49	CP	Cold	Periodic	decreasing	cold2	0.644444	-0.00740741	1	33.5	34	0.5	33.6875	-2.5	3.5	0.416667	6
CPM1	2015-03-13	50	CP	Cold	Periodic	decreasing	cold2	0.637037	-0.00740741	1	32.5	34	1.5	33.375	-2.5	3.5	0.458333	6
CPM1	2015-03-14	51	CP	Cold	Periodic	decreasing	cold2	0.62963	-0.00740741	1	33.5	34	0.5	33.6875	-2.5	3.5	0.416667	6
CPM1	2015-03-15	52	CP	Cold	Periodic	decreasing	cold2	0.622222	-0.00740741	1	32.5	33.5	1	32.9375	-2.5	3.5	0.416667	6
CPM1	2015-03-16	53	CP	Cold	Periodic	decreasing	cold2	0.614815	-0.00740741	1	32.5	34	1.5	33	-2.5	3.5	0.416667	6
CPM1	2015-03-17	54	CP	Cold	Periodic	decreasing	cold2	0.607407	-0.00740741	1	33.5	34	0.5	33.9375	-2.5	3.5	0.5	6
CPM1	2015-03-18	55	CP	Cold	Periodic	decreasing	cold2	0.6	-0.00740741	1	33.5	34	0.5	33.625	-2.5	3.5	0.416667	6
CPM1	2015-03-19	56	CP	Cold	Periodic	decreasing	cold2	0.592593	-0.00740741	1	32.5	33.5	1	33.125	-2.5	3.5	0.416667	6
CPM1	2015-03-20	57	CP	Cold	Periodic	decreasing	cold2	0.585185	-0.00740741	1	32	33.5	1.5	32.9375	-3	3.5	0.333333	6.5
CPM1	2015-03-21	58	CP	Cold	Periodic	decreasing	cold2	0.577778	-0.00740741	1	32	34	2	32.875	-3	3.5	0.416667	6.5
CPM1	2015-03-22	59	CP	Cold	Periodic	decreasing	cold2	0.57037	-0.00740741	1	33.5	34	0.5	33.8125	-2.5	3.5	0.416667	6
CPM1	2015-03-23	60	CP	Cold	Periodic	decreasing	cold2	0.562963	-0.00740741	1	33.5	33.5	0	33.5	-2.5	3.5	0.416667	6
CPM1	2015-03-24	61	CP	Cold	Periodic	decreasing	cold2	0.555556	-0.00740741	1	33	34	1	33.5	-2.5	3.5	0.375	6
CPM1	2015-03-25	62	CP	Cold	Periodic	decreasing	cold2	0.548148	-0.00740741	1	33	33.5	0.5	33.4375	-2.5	3.5	0.375	6
CPM1	2015-03-26	63	CP	Cold	Periodic	decreasing	cold2	0.540741	-0.00740741	1	33.5	33.5	0	33.5	-2.5	3.5	0.375	6
CPM1	2015-03-27	64	CP	Cold	Periodic	decreasing	cold2	0.533333	-0.00740741	1	32.5	33.5	1	33.125	-2.5	3.5	0.375	6
CPM1	2015-03-28	65	CP	Cold	Periodic	decreasing	cold2	0.525926	-0.00740741	1	32.5	33.5	1	33.1875	-2.5	3.5	0.375	6
CPM1	2015-03-29	66	CP	Cold	Periodic	decreasing	cold2	0.518519	-0.00740741	1	33.5	34.5	1	33.9375	-2.5	3.5	0.375	6
CPM1	2015-03-30	67	CP	Cold	Periodic	decreasing	cold2	0.511111	-0.00740741	1	33	34	1	33.3125	-2.5	3.5	0.333333	6
CPM1	2015-03-31	68	CP	Cold	Periodic	decreasing	cold2	0.503704	-0.00740741	1	32.5	34	1.5	33.125	-2.5	3.5	0.375	6
CPM1	2015-04-01	69	CP	Cold	Periodic	decreasing	cold2	0.496296	-0.00740741	1	33	33.5	0.5	33.4375	-2.5	3.5	0.333333	6
CPM1	2015-04-02	70	CP	Cold	Periodic	decreasing	cold2	0.488889	-0.00740741	1	33	34	1	33.5	-2.5	3.5	0.375	6
CPM1	2015-04-03	71	CP	Cold	Periodic	decreasing	cold2	0.481481	-0.00740741	1	32	33.5	1.5	32.5625	-2.5	3.5	0.375	6
CPM1	2015-04-04	72	CP	Cold	Periodic	decreasing	cold2	0.474074	-0.00740741	1	32.5	33	0.5	32.8125	-2.5	3.5	0.333333	6
CPM1	2015-04-05	73	CP	Cold	Periodic	decreasing	cold2	0.466667	-0.00740741	1	31.5	34	2.5	32.75	-2.5	3.5	0.375	6
CPM1	2015-04-06	74	CP	Cold	Periodic	decreasing	cold2	0.459259	-0.00740741	1	33.5	34.5	1	34	-2.5	3.5	0.375	6
CPM1	2015-04-07	75	CP	Cold	Periodic	decreasing	cold2	0.451852	-0.00740741	1	33	34	1	33.5625	-2.5	3.5	0.416667	6
CPM1	2015-04-08	76	CP	Cold	Periodic	decreasing	cold2	0.444444	-0.00740741	1	33	33.5	0.5	33.375	-2.5	3.5	0.375	6
CPM1	2015-04-09	77	CP	Cold	Periodic	decreasing	cold2	0.437037	-0.00740741	1	33	33.5	0.5	33.125	-2.5	3.5	0.375	6
CPM1	2015-04-10	78	CP	Cold	Periodic	decreasing	cold2	0.42963	-0.00740741	1	32.5	33.5	1	33.0625	-3	3.5	-0.0416667	6.5
CPM2	2015-01-26	4	CP	Cold	Periodic	rising	cold	0.355556	0.00740741	1	23.5	28	4.5	25.875	-3	3.5	0	6.5
CPM2	2015-01-27	5	CP	Cold	Periodic	rising	cold	0.362963	0.00740741	1	23	28.5	5.5	25.5	-3	3	-0.0833333	6
CPM2	2015-01-28	6	CP	Cold	Periodic	rising	cold	0.37037	0.00740741	1	24.5	29.5	5	27.25	-3	3	-0.0416667	6
CPM2	2015-01-29	7	CP	Cold	Periodic	rising	cold	0.377778	0.00740741	1	23.5	31.5	8	27.0625	-3	3	-0.0416667	6
CPM2	2015-01-30	8	CP	Cold	Periodic	rising	cold	0.385185	0.00740741	1	23.5	29.5	6	25.875	-3	3	-0.0416667	6
CPM2	2015-01-31	9	CP	Cold	Periodic	rising	cold	0.392593	0.00740741	1	24.5	29.5	5	26.875	-3	3	-0.0416667	6
CPM2	2015-02-01	10	CP	Cold	Periodic	rising	cold	0.4	0.00740741	1	23.5	26.5	3	25	-3	3	-0.0416667	6
CPM2	2015-02-02	11	CP	Cold	Periodic	rising	cold	0.407407	0.00740741	1	23	26.5	3.5	24.4375	-3	3	-0.0416667	6
CPM2	2015-02-03	12	CP	Cold	Periodic	rising	cold	0.414815	0.00740741	1	21	27	6	23.5	-3	3	-0.0416667	6
CPM2	2015-02-04	13	CP	Cold	Periodic	rising	cold	0.422222	0.00740741	1	21	28.5	7.5	24.5625	-3	3	-0.0416667	6
CPM2	2015-02-05	14	CP	Cold	Periodic	rising	cold	0.42963	0.00740741	1	18.5	28.5	10	22.5625	-3	3	-0.0416667	6
CPM2	2015-02-06	15	CP	Cold	Periodic	rising	cold	0.437037	0.00740741	1	22	25.5	3.5	22.9375	-3	3	-0.0416667	6
CPM2	2015-02-07	16	CP	Cold	Periodic	rising	cold	0.444444	0.00740741	1	25.5	28	2.5	26.6875	-3	3	-0.0416667	6
CPM2	2015-02-08	17	CP	Cold	Periodic	rising	cold	0.451852	0.00740741	1	23	28	5	25.9375	-3	3	-0.0416667	6
CPM2	2015-02-09	18	CP	Cold	Periodic	rising	cold	0.459259	0.00740741	1	24	30	6	26.125	-3	3	-0.0416667	6
CPM2	2015-02-10	19	CP	Cold	Periodic	rising	cold	0.466667	0.00740741	1	22	29.5	7.5	25.125	-3	3	-0.0416667	6
CPM2	2015-02-11	20	CP	Cold	Periodic	rising	cold	0.474074	0.00740741	1	21	31.5	10.5	25.0625	-3	3	-0.0416667	6
CPM2	2015-02-12	21	CP	Cold	Periodic	rising	cold	0.481481	0.00740741	1	20.5	24.5	4	22.5625	-3	3	-0.0416667	6
CPM2	2015-02-13	22	CP	Cold	Periodic	rising	cold	0.488889	0.00740741	1	21	30	9	24.5625	-3	3	-0.0416667	6
CPM2	2015-02-14	23	CP	Cold	Periodic	rising	cold	0.496296	0.00740741	1	20.5	25	4.5	23.1875	-3	3	-0.0416667	6
CPM2	2015-02-15	24	CP	Cold	Periodic	rising	cold	0.503704	0.00740741	1	22.5	32	9.5	25.3125	-3	3	-0.0416667	6
CPM2	2015-02-16	25	CP	Cold	Periodic	rising	cold	0.511111	0.00740741	1	23	26	3	24.8125	-3	3	-0.0416667	6
CPM2	2015-02-17	26	CP	Cold	Periodic	rising	cold	0.518519	0.00740741	1	23	29.5	6.5	25.1875	-3	3	0	6
CPM2	2015-02-18	27	CP	Cold	Periodic	rising	cold	0.525926	0.00740741	1	19.5	32.5	13	25.125	-3	3	0	6
CPM2	2015-02-19	28	CP	Cold	Periodic	rising	cold	0.533333	0.00740741	1	22	27	5	24.375	-3	3	0.0416667	6
CPM2	2015-02-20	29	CP	Cold	Periodic	rising	cold	0.540741	0.00740741	1	23	29.5	6.5	25.9375	-3	3	0.0416667	6
CPM2	2015-02-21	30	CP	Cold	Periodic	rising	cold	0.548148	0.00740741	1	21.5	28.5	7	24.125	-3	3	0.0416667	6
CPM2	2015-02-22	31	CP	Cold	Periodic	rising	cold	0.555556	0.00740741	1	23.5	29	5.5	26.25	-3	3	0	6
CPM2	2015-02-23	32	CP	Cold	Periodic	rising	cold	0.562963	0.00740741	1	21.5	28	6.5	25	-3	3	-0.0416667	6
CPM2	2015-02-24	33	CP	Cold	Periodic	rising	cold	0.57037	0.00740741	1	22	30.5	8.5	25.375	-3	3	-0.0416667	6
CPM2	2015-02-25	34	CP	Cold	Periodic	rising	cold	0.577778	0.00740741	1	23	25.5	2.5	24.4375	-3	3	-0.0416667	6
CPM2	2015-02-26	35	CP	Cold	Periodic	rising	cold	0.585185	0.00740741	1	23.5	31	7.5	26.625	-3	3	0.0833333	6
CPM2	2015-02-27	36	CP	Cold	Periodic	rising	cold	0.592593	0.00740741	1	20.5	29.5	9	24.875	-3	3	0	6
CPM2	2015-02-28	37	CP	Cold	Periodic	rising	cold	0.6	0.00740741	1	20.5	33	12.5	25.25	-3	3	-0.0416667	6
CPM2	2015-03-01	38	CP	Cold	Periodic	rising	cold	0.607407	0.00740741	1	22	26	4	23.75	-3	3	-0.0416667	6
CPM2	2015-03-02	39	CP	Cold	Periodic	rising	cold	0.614815	0.00740741	1	21.5	27.5	6	24.375	-3	3	-0.0416667	6
CPM2	2015-03-03	40	CP	Cold	Periodic	rising	cold	0.622222	0.00740741	1	21.5	28.5	7	24.125	-3	3	-0.0416667	6
CPM2	2015-03-04	41	CP	Cold	Periodic	rising	cold	0.62963	0.00740741	1	22	26.5	4.5	24.6875	-3	3	-0.0416667	6
CPM2	2015-03-05	42	CP	Cold	Periodic	rising	cold	0.637037	0.00740741	1	21	30	9	25.5625	-3	3	-0.0416667	6
CPM2	2015-03-06	43	CP	Cold	Periodic	rising	cold	0.644444	0.00740741	1	24.5	30	5.5	27.0625	-3	3	-0.0416667	6
CPM2	2015-03-07	44	CP	Cold	Periodic	rising	cold	0.651852	0.00740741	1	24	27	3	25.5	-3	3	-0.0416667	6
CPM2	2015-03-08	45	CP	Cold	Periodic	rising	cold	0.659259	0.00740741	1	24.5	27	2.5	25.9375	-3	3	0.0416667	6
CPM2	2015-03-09	46	CP	Cold	Periodic	rising	cold	0.666667	0.00740741	1	27.5	33.5	6	29.625	-3	3	0.0833333	6
CPM2	2015-03-10	47	CP	Cold	Periodic	decreasing	cold2	0.659259	-0.00740741	1	26	28	2	26.875	-3	3	0.0416667	6
CPM2	2015-03-11	48	CP	Cold	Periodic	decreasing	cold2	0.651852	-0.00740741	1	26	28	2	26.875	-3	3	0	6
CPM2	2015-03-12	49	CP	Cold	Periodic	decreasing	cold2	0.644444	-0.00740741	1	25.5	28.5	3	26.625	-3	3	-0.0416667	6
CPM2	2015-03-13	50	CP	Cold	Periodic	decreasing	cold2	0.637037	-0.00740741	1	27	29.5	2.5	27.75	-3	3	0	6
CPM2	2015-03-14	51	CP	Cold	Periodic	decreasing	cold2	0.62963	-0.00740741	1	25.5	28.5	3	27.125	-3	3	-0.0416667	6
CPM2	2015-03-15	52	CP	Cold	Periodic	decreasing	cold2	0.622222	-0.00740741	1	26.5	28.5	2	27.75	-3	3	-0.0416667	6
CPM2	2015-03-16	53	CP	Cold	Periodic	decreasing	cold2	0.614815	-0.00740741	1	25.5	28.5	3	26.75	-3	3	-0.0416667	6
CPM2	2015-03-17	54	CP	Cold	Periodic	decreasing	cold2	0.607407	-0.00740741	1	22.5	29.5	7	26	-3	3	0	6
CPM2	2015-03-18	55	CP	Cold	Periodic	decreasing	cold2	0.6	-0.00740741	1	23	29.5	6.5	25.4375	-3	3	-0.0416667	6
CPM2	2015-03-19	56	CP	Cold	Periodic	decreasing	cold2	0.592593	-0.00740741	1	22	27	5	24.5	-3	3	0.0416667	6
CPM2	2015-03-20	57	CP	Cold	Periodic	decreasing	cold2	0.585185	-0.00740741	1	22	27	5	23.875	-3	3	0.0416667	6
CPM2	2015-03-21	58	CP	Cold	Periodic	decreasing	cold2	0.577778	-0.00740741	1	21.5	23	1.5	22.375	-3	3	0.0416667	6
CPM2	2015-03-22	59	CP	Cold	Periodic	decreasing	cold2	0.57037	-0.00740741	1	22	29.5	7.5	25.625	-3	3	0.0416667	6
CPM2	2015-03-23	60	CP	Cold	Periodic	decreasing	cold2	0.562963	-0.00740741	1	25	26.5	1.5	25.9375	-3	3	0.0416667	6
CPM2	2015-03-24	61	CP	Cold	Periodic	decreasing	cold2	0.555556	-0.00740741	1	24.5	27.5	3	26.1875	-3	3	0.0416667	6
CPM2	2015-03-25	62	CP	Cold	Periodic	decreasing	cold2	0.548148	-0.00740741	1	23.5	26.5	3	24.9375	-3	3	0.0416667	6
CPM2	2015-03-26	63	CP	Cold	Periodic	decreasing	cold2	0.540741	-0.00740741	1	22	27	5	24.875	-3	3	0.0416667	6
CPM2	2015-03-27	64	CP	Cold	Periodic	decreasing	cold2	0.533333	-0.00740741	1	23	24.5	1.5	23.875	-3	3	0.0416667	6
CPM2	2015-03-28	65	CP	Cold	Periodic	decreasing	cold2	0.525926	-0.00740741	1	22.5	25	2.5	24.1875	-3	3	0	6
CPM2	2015-03-29	66	CP	Cold	Periodic	decreasing	cold2	0.518519	-0.00740741	1	23	26	3	24.375	-3	3	0	6
CPM2	2015-03-30	67	CP	Cold	Periodic	decreasing	cold2	0.511111	-0.00740741	1	22.5	26	3.5	24.25	-3	3	-0.0416667	6
CPM2	2015-03-31	68	CP	Cold	Periodic	decreasing	cold2	0.503704	-0.00740741	1	24	25.5	1.5	24.75	-3	3	-0.0416667	6
CPM2	2015-04-01	69	CP	Cold	Periodic	decreasing	cold2	0.496296	-0.00740741	1	23.5	26.5	3	25.3125	-3	3	-0.0416667	6
CPM2	2015-04-02	70	CP	Cold	Periodic	decreasing	cold2	0.488889	-0.00740741	1	23.5	26	2.5	24.6875	-3	3	-0.0416667	6
CPM2	2015-04-03	71	CP	Cold	Periodic	decreasing	cold2	0.481481	-0.00740741	1	23	26.5	3.5	24.5625	-3	3	-0.0416667	6
CPM2	2015-04-04	72	CP	Cold	Periodic	decreasing	cold2	0.474074	-0.00740741	1	21	24	3	22.0625	-3	3	-0.0416667	6
CPM2	2015-04-05	73	CP	Cold	Periodic	decreasing	cold2	0.466667	-0.00740741	1	21	25	4	22.3125	-3	3	-0.0416667	6
CPM2	2015-04-06	74	CP	Cold	Periodic	decreasing	cold2	0.459259	-0.00740741	1	21.5	26	4.5	23.1875	-3	3	-0.0416667	6
CPM2	2015-04-07	75	CP	Cold	Periodic	decreasing	cold2	0.451852	-0.00740741	1	22	29	7	24.8125	-3	3	-0.0833333	6
CPM2	2015-04-08	76	CP	Cold	Periodic	decreasing	cold2	0.444444	-0.00740741	1	24	26.5	2.5	25	-3	3	-0.125	6
CPM2	2015-04-09	77	CP	Cold	Periodic	decreasing	cold2	0.437037	-0.00740741	1	23	28	5	25.375	-3	3	-0.125	6
CPM2	2015-04-10	78	CP	Cold	Periodic	decreasing	cold2	0.42963	-0.00740741	1	23	25.5	2.5	24.25	-3.5	3	-0.458333	6.5
CPP1	2015-01-26	4	CP	Cold	Periodic	rising	cold	0.355556	0.00740741	1	19.5	25	5.5	22.0625	-3	3.5	0.125	6.5
CPP1	2015-01-27	5	CP	Cold	Periodic	rising	cold	0.362963	0.00740741	1	19.5	24	4.5	22.125	-3	3.5	0.125	6.5
CPP1	2015-01-28	6	CP	Cold	Periodic	rising	cold	0.37037	0.00740741	1	21.5	29	7.5	24.75	-3	3.5	0.0833333	6.5
CPP1	2015-01-29	7	CP	Cold	Periodic	rising	cold	0.377778	0.00740741	1	20	30	10	22.875	-3	3.5	0.0833333	6.5
CPP1	2015-01-30	8	CP	Cold	Periodic	rising	cold	0.385185	0.00740741	1	19	21.5	2.5	20.4375	-3	3	0.0416667	6
CPP1	2015-01-31	9	CP	Cold	Periodic	rising	cold	0.392593	0.00740741	1	20	28	8	23.0625	-3	3	0	6
CPP1	2015-02-01	10	CP	Cold	Periodic	rising	cold	0.4	0.00740741	1	20	23.5	3.5	21.6875	-3	3	0	6
CPP1	2015-02-02	11	CP	Cold	Periodic	rising	cold	0.407407	0.00740741	1	20.5	23.5	3	22.0625	-3	3	0	6
CPP1	2015-02-03	12	CP	Cold	Periodic	rising	cold	0.414815	0.00740741	1	18.5	25.5	7	21.5625	-3	3	0	6
CPP1	2015-02-04	13	CP	Cold	Periodic	rising	cold	0.422222	0.00740741	1	18.5	22	3.5	20.375	-3	3	0	6
CPP1	2015-02-05	14	CP	Cold	Periodic	rising	cold	0.42963	0.00740741	1	19	22	3	20.8125	-3	3	0	6
CPP1	2015-02-06	15	CP	Cold	Periodic	rising	cold	0.437037	0.00740741	1	19	23	4	21.125	-3	3	0	6
CPP1	2015-02-07	16	CP	Cold	Periodic	rising	cold	0.444444	0.00740741	1	19	25	6	21.125	-3	3	0	6
CPP1	2015-02-08	17	CP	Cold	Periodic	rising	cold	0.451852	0.00740741	1	20.5	25	4.5	22.25	-3	3	0	6
CPP1	2015-02-09	18	CP	Cold	Periodic	rising	cold	0.459259	0.00740741	1	18.5	22	3.5	20.625	-3	3	0	6
CPP1	2015-02-10	19	CP	Cold	Periodic	rising	cold	0.466667	0.00740741	1	20	22.5	2.5	21.5625	-3	3	0	6
CPP1	2015-02-11	20	CP	Cold	Periodic	rising	cold	0.474074	0.00740741	1	19	25	6	21.25	-3	3	0	6
CPP1	2015-02-12	21	CP	Cold	Periodic	rising	cold	0.481481	0.00740741	1	18.5	24.5	6	21	-3	3	0	6
CPP1	2015-02-13	22	CP	Cold	Periodic	rising	cold	0.488889	0.00740741	1	26	32.5	6.5	28.9375	-3	3	0	6
CPP1	2015-02-14	23	CP	Cold	Periodic	rising	cold	0.496296	0.00740741	1	23.5	27.5	4	25.625	-3	3	0	6
CPP1	2015-02-15	24	CP	Cold	Periodic	rising	cold	0.503704	0.00740741	1	25.5	33	7.5	28.5625	-3	3	0	6
CPP1	2015-02-16	25	CP	Cold	Periodic	rising	cold	0.511111	0.00740741	1	24.5	29.5	5	27.0625	-3	3	0	6
CPP1	2015-02-17	26	CP	Cold	Periodic	rising	cold	0.518519	0.00740741	1	26	30	4	28.1875	-3	3	0	6
CPP1	2015-02-18	27	CP	Cold	Periodic	rising	cold	0.525926	0.00740741	1	24.5	29	4.5	27.125	-3	3	0	6
CPP1	2015-02-19	28	CP	Cold	Periodic	rising	cold	0.533333	0.00740741	1	26	33.5	7.5	28.3125	-3	3	0.0416667	6
CPP1	2015-02-20	29	CP	Cold	Periodic	rising	cold	0.540741	0.00740741	1	26.5	32.5	6	28.3125	-3	3.5	0.166667	6.5
CPP1	2015-02-21	30	CP	Cold	Periodic	rising	cold	0.548148	0.00740741	1	22	25	3	23.5625	-3	3	0.0833333	6
CPP1	2015-02-22	31	CP	Cold	Periodic	rising	cold	0.555556	0.00740741	1	21	26	5	23.5	-3	3	0.0833333	6
CPP1	2015-02-23	32	CP	Cold	Periodic	rising	cold	0.562963	0.00740741	1	21.5	25	3.5	23.4375	-3	3	0.0833333	6
CPP1	2015-02-24	33	CP	Cold	Periodic	rising	cold	0.57037	0.00740741	1	19	21	2	20.1875	-3	3	0.0833333	6
CPP1	2015-02-25	34	CP	Cold	Periodic	rising	cold	0.577778	0.00740741	1	18.5	22.5	4	20	-3	3	0.0833333	6
CPP1	2015-02-26	35	CP	Cold	Periodic	rising	cold	0.585185	0.00740741	1	19	22	3	20.375	-3	3	0.25	6
CPP1	2015-02-27	36	CP	Cold	Periodic	rising	cold	0.592593	0.00740741	1	19.5	24.5	5	21.25	-3	3.5	0.166667	6.5
CPP1	2015-02-28	37	CP	Cold	Periodic	rising	cold	0.6	0.00740741	1	19	26	7	21.5625	-3	3.5	0.166667	6.5
CPP1	2015-03-01	38	CP	Cold	Periodic	rising	cold	0.607407	0.00740741	1	18	22.5	4.5	19.5625	-3	3.5	0.166667	6.5
CPP1	2015-03-02	39	CP	Cold	Periodic	rising	cold	0.614815	0.00740741	1	19	28	9	21.75	-3	3.5	0.166667	6.5
CPP1	2015-03-03	40	CP	Cold	Periodic	rising	cold	0.622222	0.00740741	1	19.5	22	2.5	20.25	-3	3	0.125	6
CPP1	2015-03-04	41	CP	Cold	Periodic	rising	cold	0.62963	0.00740741	1	20	23	3	20.9375	-3	3.5	0.166667	6.5
CPP1	2015-03-05	42	CP	Cold	Periodic	rising	cold	0.637037	0.00740741	1	21	28.5	7.5	23.875	-3	3.5	0.166667	6.5
CPP1	2015-03-06	43	CP	Cold	Periodic	rising	cold	0.644444	0.00740741	1	20.5	23.5	3	22.125	-3	3.5	0.166667	6.5
CPP1	2015-03-07	44	CP	Cold	Periodic	rising	cold	0.651852	0.00740741	1	22	25	3	23.5625	-3	3.5	0.166667	6.5
CPP1	2015-03-08	45	CP	Cold	Periodic	rising	cold	0.659259	0.00740741	1	22.5	24	1.5	23.3125	-3	3.5	0.166667	6.5
CPP1	2015-03-09	46	CP	Cold	Periodic	rising	cold	0.666667	0.00740741	1	23.5	30.5	7	26.6875	-3	3.5	0.166667	6.5
CPP1	2015-03-10	47	CP	Cold	Periodic	decreasing	cold2	0.659259	-0.00740741	1	23.5	26.5	3	24.625	-3	3.5	0.166667	6.5
CPP1	2015-03-11	48	CP	Cold	Periodic	decreasing	cold2	0.651852	-0.00740741	1	25	27	2	26.25	-3	3.5	0.166667	6.5
CPP1	2015-03-12	49	CP	Cold	Periodic	decreasing	cold2	0.644444	-0.00740741	1	22.5	27	4.5	24.625	-3	3.5	0.166667	6.5
CPP1	2015-03-13	50	CP	Cold	Periodic	decreasing	cold2	0.637037	-0.00740741	1	25	31.5	6.5	27.9375	-3	3.5	0.166667	6.5
CPP1	2015-03-14	51	CP	Cold	Periodic	decreasing	cold2	0.62963	-0.00740741	1	24	26.5	2.5	25.1875	-3	3.5	0.166667	6.5
CPP1	2015-03-15	52	CP	Cold	Periodic	decreasing	cold2	0.622222	-0.00740741	1	24.5	27	2.5	25.375	-3	3.5	0.166667	6.5
CPP1	2015-03-16	53	CP	Cold	Periodic	decreasing	cold2	0.614815	-0.00740741	1	24.5	27	2.5	25.5625	-3	3.5	0.166667	6.5
CPP1	2015-03-17	54	CP	Cold	Periodic	decreasing	cold2	0.607407	-0.00740741	1	24	29.5	5.5	26.3125	-3	3.5	0.166667	6.5
CPP1	2015-03-18	55	CP	Cold	Periodic	decreasing	cold2	0.6	-0.00740741	1	23.5	27	3.5	24.8125	-3	3.5	0.166667	6.5
CPP1	2015-03-19	56	CP	Cold	Periodic	decreasing	cold2	0.592593	-0.00740741	1	24	27.5	3.5	25.3125	-3	3.5	0.166667	6.5
CPP1	2015-03-20	57	CP	Cold	Periodic	decreasing	cold2	0.585185	-0.00740741	1	24	27.5	3.5	25.4375	-3	3.5	0.166667	6.5
CPP1	2015-03-21	58	CP	Cold	Periodic	decreasing	cold2	0.577778	-0.00740741	1	24.5	28	3.5	25.5	-3	3.5	0.166667	6.5
CPP1	2015-03-22	59	CP	Cold	Periodic	decreasing	cold2	0.57037	-0.00740741	1	25.5	28	2.5	26.75	-3	3.5	0.125	6.5
CPP1	2015-03-23	60	CP	Cold	Periodic	decreasing	cold2	0.562963	-0.00740741	1	25	28	3	26.3125	-3	3.5	0.125	6.5
CPP1	2015-03-24	61	CP	Cold	Periodic	decreasing	cold2	0.555556	-0.00740741	1	25.5	31.5	6	28.4375	-3	3	0.0833333	6
CPP1	2015-03-25	62	CP	Cold	Periodic	decreasing	cold2	0.548148	-0.00740741	1	26	28.5	2.5	27	-3	3.5	0.125	6.5
CPP1	2015-03-26	63	CP	Cold	Periodic	decreasing	cold2	0.540741	-0.00740741	1	26	27.5	1.5	26.8125	-3	3.5	0.125	6.5
CPP1	2015-03-27	64	CP	Cold	Periodic	decreasing	cold2	0.533333	-0.00740741	1	26	31	5	27.75	-3	3.5	0.166667	6.5
CPP1	2015-03-28	65	CP	Cold	Periodic	decreasing	cold2	0.525926	-0.00740741	1	27	31	4	29	-3	3.5	0.166667	6.5
CPP1	2015-03-29	66	CP	Cold	Periodic	decreasing	cold2	0.518519	-0.00740741	1	28	30.5	2.5	28.6875	-3	3.5	0.125	6.5
CPP1	2015-03-30	67	CP	Cold	Periodic	decreasing	cold2	0.511111	-0.00740741	1	27	31.5	4.5	28.75	-3	3.5	0.125	6.5
CPP1	2015-03-31	68	CP	Cold	Periodic	decreasing	cold2	0.503704	-0.00740741	1	28	32.5	4.5	29.4375	-3	3.5	0.125	6.5
CPP1	2015-04-01	69	CP	Cold	Periodic	decreasing	cold2	0.496296	-0.00740741	1	27.5	29.5	2	28.375	-3	3	0.0833333	6
CPP1	2015-04-02	70	CP	Cold	Periodic	decreasing	cold2	0.488889	-0.00740741	1	27	29.5	2.5	28.4375	-3	3.5	0.0833333	6.5
CPP1	2015-04-03	71	CP	Cold	Periodic	decreasing	cold2	0.481481	-0.00740741	1	27	28.5	1.5	27.4375	-3	3.5	0.0833333	6.5
CPP1	2015-04-04	72	CP	Cold	Periodic	decreasing	cold2	0.474074	-0.00740741	1	26.5	29.5	3	27.4375	-3	3.5	0.0833333	6.5
CPP1	2015-04-05	73	CP	Cold	Periodic	decreasing	cold2	0.466667	-0.00740741	1	26	27.5	1.5	26.5	-3	3.5	0.0833333	6.5
CPP1	2015-04-06	74	CP	Cold	Periodic	decreasing	cold2	0.459259	-0.00740741	1	25	30.5	5.5	27.4375	-3	3.5	0.125	6.5
CPP1	2015-04-07	75	CP	Cold	Periodic	decreasing	cold2	0.451852	-0.00740741	1	26.5	32	5.5	28.9375	-3	3	0.0833333	6
CPP1	2015-04-08	76	CP	Cold	Periodic	decreasing	cold2	0.444444	-0.00740741	1	27	31.5	4.5	28.3125	-3	3	0.0416667	6
CPP1	2015-04-09	77	CP	Cold	Periodic	decreasing	cold2	0.437037	-0.00740741	1	27	29	2	27.625	-3	3	0	6
CPP1	2015-04-10	78	CP	Cold	Periodic	decreasing	cold2	0.42963	-0.00740741	1	26.5	28.5	2	27.1875	-3	3	-0.333333	6
CPP2	2015-01-26	4	CP	Cold	Periodic	rising	cold	0.355556	0.00740741	1	24	29.5	5.5	26.25	-3	3.5	0.125	6.5
CPP2	2015-01-27	5	CP	Cold	Periodic	rising	cold	0.362963	0.00740741	1	25	29.5	4.5	27.1875	-3	3.5	0.0833333	6.5
CPP2	2015-01-28	6	CP	Cold	Periodic	rising	cold	0.37037	0.00740741	1	26	28.5	2.5	26.9375	-3	3.5	0.125	6.5
CPP2	2015-01-29	7	CP	Cold	Periodic	rising	cold	0.377778	0.00740741	1	25.5	33.5	8	29.4375	-3	3.5	0.125	6.5
CPP2	2015-01-30	8	CP	Cold	Periodic	rising	cold	0.385185	0.00740741	1	25.5	30.5	5	27.125	-3	3.5	0.125	6.5
CPP2	2015-01-31	9	CP	Cold	Periodic	rising	cold	0.392593	0.00740741	1	23.5	30	6.5	26.5	-3	3.5	0.125	6.5
CPP2	2015-02-01	10	CP	Cold	Periodic	rising	cold	0.4	0.00740741	1	24.5	29.5	5	27.3125	-3	3.5	0.125	6.5
CPP2	2015-02-02	11	CP	Cold	Periodic	rising	cold	0.407407	0.00740741	1	24	31.5	7.5	28.0625	-3	3.5	0.125	6.5
CPP2	2015-02-03	12	CP	Cold	Periodic	rising	cold	0.414815	0.00740741	1	21.5	28	6.5	25.0625	-3	3.5	0.125	6.5
CPP2	2015-02-04	13	CP	Cold	Periodic	rising	cold	0.422222	0.00740741	1	20.5	28	7.5	24	-3	3.5	0.125	6.5
CPP2	2015-02-05	14	CP	Cold	Periodic	rising	cold	0.42963	0.00740741	1	18.5	25.5	7	22.6875	-3	3.5	0.0833333	6.5
CPP2	2015-02-06	15	CP	Cold	Periodic	rising	cold	0.437037	0.00740741	1	18.5	23.5	5	20.9375	-3	3.5	0.0833333	6.5
CPP2	2015-02-07	16	CP	Cold	Periodic	rising	cold	0.444444	0.00740741	1	17.5	25.5	8	20.9375	-3	3.5	0.125	6.5
CPP2	2015-02-08	17	CP	Cold	Periodic	rising	cold	0.451852	0.00740741	1	20	26.5	6.5	24.375	-3	3.5	0.0833333	6.5
CPP2	2015-02-09	18	CP	Cold	Periodic	rising	cold	0.459259	0.00740741	1	21	27.5	6.5	22.875	-3	3.5	0.0833333	6.5
CPP2	2015-02-10	19	CP	Cold	Periodic	rising	cold	0.466667	0.00740741	1	21.5	27	5.5	24.4375	-3	3.5	0.0833333	6.5
CPP2	2015-02-11	20	CP	Cold	Periodic	rising	cold	0.474074	0.00740741	1	22.5	27	4.5	25.0625	-3	3.5	0.0833333	6.5
CPP2	2015-02-12	21	CP	Cold	Periodic	rising	cold	0.481481	0.00740741	1	27	28.5	1.5	28.125	-3	3.5	0.0833333	6.5
CPP2	2015-02-13	22	CP	Cold	Periodic	rising	cold	0.488889	0.00740741	1	23	30	7	26.3125	-3	3	0.0416667	6
CPP2	2015-02-14	23	CP	Cold	Periodic	rising	cold	0.496296	0.00740741	1	20.5	24	3.5	22.1875	-3	3	0	6
CPP2	2015-02-15	24	CP	Cold	Periodic	rising	cold	0.503704	0.00740741	1	18.5	24	5.5	21.1875	-3	3	0.0416667	6
CPP2	2015-02-16	25	CP	Cold	Periodic	rising	cold	0.511111	0.00740741	1	19.5	27	7.5	23.5	-3	3	0	6
CPP2	2015-02-17	26	CP	Cold	Periodic	rising	cold	0.518519	0.00740741	1	22	29	7	24.3125	-3	3	0.0416667	6
CPP2	2015-02-18	27	CP	Cold	Periodic	rising	cold	0.525926	0.00740741	1	21	24	3	21.875	-3	3	0	6
CPP2	2015-02-19	28	CP	Cold	Periodic	rising	cold	0.533333	0.00740741	1	24.5	28	3.5	26.625	-3	3	0.0833333	6
CPP2	2015-02-20	29	CP	Cold	Periodic	rising	cold	0.540741	0.00740741	1	28.5	30.5	2	30.0625	-3	3	0	6
CPP2	2015-02-21	30	CP	Cold	Periodic	rising	cold	0.548148	0.00740741	1	29	32.5	3.5	30.625	-3	3	0	6
CPP2	2015-02-22	31	CP	Cold	Periodic	rising	cold	0.555556	0.00740741	1	21.5	31	9.5	26.5625	-3	3	0	6
CPP2	2015-02-23	32	CP	Cold	Periodic	rising	cold	0.562963	0.00740741	1	19	21.5	2.5	20.3125	-3	3	0	6
CPP2	2015-02-24	33	CP	Cold	Periodic	rising	cold	0.57037	0.00740741	1	19	31	12	26	-3	3	0	6
CPP2	2015-02-25	34	CP	Cold	Periodic	rising	cold	0.577778	0.00740741	1	27.5	33	5.5	30.8125	-3	3	0	6
CPP2	2015-02-26	35	CP	Cold	Periodic	rising	cold	0.585185	0.00740741	1	30.5	33.5	3	32.5	-3	3	0.125	6
CPP2	2015-02-27	36	CP	Cold	Periodic	rising	cold	0.592593	0.00740741	1	31	34	3	32.5	-3	3	0	6
CPP2	2015-02-28	37	CP	Cold	Periodic	rising	cold	0.6	0.00740741	1	24.5	33	8.5	29.4375	-3	3	0	6
CPP2	2015-03-01	38	CP	Cold	Periodic	rising	cold	0.607407	0.00740741	1	21	26.5	5.5	23.375	-3	3	0	6
CPP2	2015-03-02	39	CP	Cold	Periodic	rising	cold	0.614815	0.00740741	1	19.5	31	11.5	24.8125	-3	3	0	6
CPP2	2015-03-03	40	CP	Cold	Periodic	rising	cold	0.622222	0.00740741	1	18.5	26	7.5	20.875	-3	3	0	6
CPP2	2015-03-04	41	CP	Cold	Periodic	rising	cold	0.62963	0.00740741	1	19	24	5	21.5625	-3	3	0	6
CPP2	2015-03-05	42	CP	Cold	Periodic	rising	cold	0.637037	0.00740741	1	22.5	25.5	3	24.1875	-3	3	0	6
CPP2	2015-03-06	43	CP	Cold	Periodic	rising	cold	0.644444	0.00740741	1	20	24	4	22.0625	-3	3	0	6
CPP2	2015-03-07	44	CP	Cold	Periodic	rising	cold	0.651852	0.00740741	1	19.5	22	2.5	20.8125	-3	3	0	6
CPP2	2015-03-08	45	CP	Cold	Periodic	rising	cold	0.659259	0.00740741	1	22.5	30	7.5	28.3125	-3	3	0	6
CPP2	2015-03-09	46	CP	Cold	Periodic	rising	cold	0.666667	0.00740741	1	21	31	10	27.6875	-3	3	0	6
CPP2	2015-03-10	47	CP	Cold	Periodic	decreasing	cold2	0.659259	-0.00740741	1	23	32.5	9.5	30.125	-3	3	0	6
CPP2	2015-03-11	48	CP	Cold	Periodic	decreasing	cold2	0.651852	-0.00740741	1	31	33.5	2.5	32.5	-3	3	0	6
CPP2	2015-03-12	49	CP	Cold	Periodic	decreasing	cold2	0.644444	-0.00740741	1	30.5	33.5	3	32.5	-3	3	0	6
CPP2	2015-03-13	50	CP	Cold	Periodic	decreasing	cold2	0.637037	-0.00740741	1	20.5	32.5	12	26.875	-3	3	0	6
CPP2	2015-03-14	51	CP	Cold	Periodic	decreasing	cold2	0.62963	-0.00740741	1	20	24	4	22.25	-3	3	0	6
CPP2	2015-03-15	52	CP	Cold	Periodic	decreasing	cold2	0.622222	-0.00740741	0	21.5	25	3.5	23.375	-3	3	0	6
CPP2	2015-03-16	53	CP	Cold	Periodic	decreasing	cold2	0.614815	-0.00740741	0	20.5	23.5	3	21.5	-3	3	0	6
CPP2	2015-03-17	54	CP	Cold	Periodic	decreasing	cold2	0.607407	-0.00740741	0	19.5	22	2.5	20.75	-3	3	0	6
CPP2	2015-03-18	55	CP	Cold	Periodic	decreasing	cold2	0.6	-0.00740741	0	20.5	23.5	3	21.6875	-3	3	0	6
CPP2	2015-03-19	56	CP	Cold	Periodic	decreasing	cold2	0.592593	-0.00740741	0	19	22.5	3.5	20.625	-3	3	0	6
CPP2	2015-03-20	57	CP	Cold	Periodic	decreasing	cold2	0.585185	-0.00740741	0	17	22	5	20	-3	3	0	6
CPP2	2015-03-21	58	CP	Cold	Periodic	decreasing	cold2	0.577778	-0.00740741	0	17	19.5	2.5	18.3125	-3	3	0	6
CPP2	2015-03-22	59	CP	Cold	Periodic	decreasing	cold2	0.57037	-0.00740741	0	13.5	16	2.5	14.6875	-3	3	0	6
CPP2	2015-03-23	60	CP	Cold	Periodic	decreasing	cold2	0.562963	-0.00740741	0	12.5	15.5	3	13.4375	-3	3	0	6
CPP2	2015-03-24	61	CP	Cold	Periodic	decreasing	cold2	0.555556	-0.00740741	0	9	12.5	3.5	10.4375	-3	3	0	6
CPP2	2015-03-25	62	CP	Cold	Periodic	decreasing	cold2	0.548148	-0.00740741	0	3	7.5	4.5	5	-3	3	0	6
CPP2	2015-03-26	63	CP	Cold	Periodic	decreasing	cold2	0.540741	-0.00740741	0	-0.5	2	2.5	0.8125	-3	3	0	6
CPP2	2015-03-27	64	CP	Cold	Periodic	decreasing	cold2	0.533333	-0.00740741	0	-1	2	3	0.5	-3	3	0	6
CPP2	2015-03-28	65	CP	Cold	Periodic	decreasing	cold2	0.525926	-0.00740741	0	-1	2	3	0.4375	-3	3	0	6
CPP2	2015-03-29	66	CP	Cold	Periodic	decreasing	cold2	0.518519	-0.00740741	0	-1	2	3	0.375	-3	3	0	6
CPP2	2015-03-30	67	CP	Cold	Periodic	decreasing	cold2	0.511111	-0.00740741	0	-1	2	3	0.375	-3	3	0	6
CPP2	2015-03-31	68	CP	Cold	Periodic	decreasing	cold2	0.503704	-0.00740741	0	-1	2	3	0.375	-3	3	0	6
CPP2	2015-04-01	69	CP	Cold	Periodic	decreasing	cold2	0.496296	-0.00740741	0	-1	2	3	0.375	-3	3	0	6
CPP2	2015-04-02	70	CP	Cold	Periodic	decreasing	cold2	0.488889	-0.00740741	0	-1	2	3	0.375	-3	3	0	6
CPP2	2015-04-03	71	CP	Cold	Periodic	decreasing	cold2	0.481481	-0.00740741	0	-1	2	3	0.375	-3	3	0	6
CPP2	2015-04-04	72	CP	Cold	Periodic	decreasing	cold2	0.474074	-0.00740741	0	-1	2	3	0.375	-3	3	0	6
CPP2	2015-04-05	73	CP	Cold	Periodic	decreasing	cold2	0.466667	-0.00740741	0	-1	2	3	0.375	-3	3	0	6
CPP2	2015-04-06	74	CP	Cold	Periodic	decreasing	cold2	0.459259	-0.00740741	0	-1	2	3	0.375	-3	3	0	6
CPP2	2015-04-07	75	CP	Cold	Periodic	decreasing	cold2	0.451852	-0.00740741	0	-1	2	3	0.3125	-3	3	0	6
CPP2	2015-04-08	76	CP	Cold	Periodic	decreasing	cold2	0.444444	-0.00740741	0	-1.5	2.5	4	0.375	-3	3	0	6
CPP2	2015-04-09	77	CP	Cold	Periodic	decreasing	cold2	0.437037	-0.00740741	0	-1.5	2.5	4	0.5	-3	3	0	6
CPP2	2015-04-10	78	CP	Cold	Periodic	decreasing	cold2	0.42963	-0.00740741	0	-2	2.5	4.5	0.375	-3	3	-0.416667	6
CRM1	2015-01-26	4	CR	Cold	Rising	rising	cold	0.338889	0.00185185	1	25.5	31	5.5	28.875	-2.5	3.5	0.375	6
CRM1	2015-01-27	5	CR	Cold	Rising	rising	cold	0.340741	0.00185185	1	26.5	33.5	7	30.3125	-2.5	3.5	0.375	6
CRM1	2015-01-28	6	CR	Cold	Rising	rising	cold	0.342593	0.00185185	1	27	34	7	31	-2.5	3.5	0.375	6
CRM1	2015-01-29	7	CR	Cold	Rising	rising	cold	0.344444	0.00185185	1	25.5	33	7.5	30.5625	-2.5	3.5	0.375	6
CRM1	2015-01-30	8	CR	Cold	Rising	rising	cold	0.346296	0.00185185	1	24.5	33.5	9	30.8125	-2.5	3.5	0.375	6
CRM1	2015-01-31	9	CR	Cold	Rising	rising	cold	0.348148	0.00185185	1	28	33.5	5.5	30.9375	-2.5	3.5	0.375	6
CRM1	2015-02-01	10	CR	Cold	Rising	rising	cold	0.35	0.00185185	1	24	33.5	9.5	28.875	-2.5	3.5	0.375	6
CRM1	2015-02-02	11	CR	Cold	Rising	rising	cold	0.351852	0.00185185	1	30	33.5	3.5	32.1875	-2.5	3.5	0.375	6
CRM1	2015-02-03	12	CR	Cold	Rising	rising	cold	0.353704	0.00185185	1	25.5	33	7.5	30.625	-2.5	3.5	0.375	6
CRM1	2015-02-04	13	CR	Cold	Rising	rising	cold	0.355556	0.00185185	1	27.5	33	5.5	30.75	-2.5	3.5	0.375	6
CRM1	2015-02-05	14	CR	Cold	Rising	rising	cold	0.357407	0.00185185	1	24	32.5	8.5	29.625	-2.5	3.5	0.375	6
CRM1	2015-02-06	15	CR	Cold	Rising	rising	cold	0.359259	0.00185185	1	30.5	32	1.5	31.125	-2.5	3.5	0.375	6
CRM1	2015-02-07	16	CR	Cold	Rising	rising	cold	0.361111	0.00185185	1	29.5	34	4.5	31.9375	-2.5	3.5	0.375	6
CRM1	2015-02-08	17	CR	Cold	Rising	rising	cold	0.362963	0.00185185	1	28.5	33.5	5	31.8125	-2.5	3.5	0.375	6
CRM1	2015-02-09	18	CR	Cold	Rising	rising	cold	0.364815	0.00185185	1	29	33	4	31.6875	-2.5	3.5	0.375	6
CRM1	2015-02-10	19	CR	Cold	Rising	rising	cold	0.366667	0.00185185	1	27	32	5	29.8125	-3	3.5	0.333333	6.5
CRM1	2015-02-11	20	CR	Cold	Rising	rising	cold	0.368519	0.00185185	1	22.5	33	10.5	29.875	-2.5	3.5	0.375	6
CRM1	2015-02-12	21	CR	Cold	Rising	rising	cold	0.37037	0.00185185	1	25.5	32	6.5	28.4375	-3	3.5	0.333333	6.5
CRM1	2015-02-13	22	CR	Cold	Rising	rising	cold	0.372222	0.00185185	1	31.5	32.5	1	31.875	-3	3.5	0.333333	6.5
CRM1	2015-02-14	23	CR	Cold	Rising	rising	cold	0.374074	0.00185185	1	28.5	33	4.5	31.5	-2.5	3.5	0.375	6
CRM1	2015-02-15	24	CR	Cold	Rising	rising	cold	0.375926	0.00185185	1	32	33	1	32.3125	-3	3.5	0.333333	6.5
CRM1	2015-02-16	25	CR	Cold	Rising	rising	cold	0.377778	0.00185185	1	24	32.5	8.5	28.5	-2.5	3.5	0.375	6
CRM1	2015-02-17	26	CR	Cold	Rising	rising	cold	0.37963	0.00185185	1	26	33.5	7.5	30.3125	-2.5	3.5	0.375	6
CRM1	2015-02-18	27	CR	Cold	Rising	rising	cold	0.381481	0.00185185	1	29	33.5	4.5	31.75	-2.5	3.5	0.375	6
CRM1	2015-02-19	28	CR	Cold	Rising	rising	cold	0.383333	0.00185185	1	26	33.5	7.5	30.1875	-2.5	3.5	0.375	6
CRM1	2015-02-20	29	CR	Cold	Rising	rising	cold	0.385185	0.00185185	1	25.5	32.5	7	30.5625	-2.5	3.5	0.416667	6
CRM1	2015-02-21	30	CR	Cold	Rising	rising	cold	0.387037	0.00185185	1	27.5	31	3.5	29.8125	-3	3.5	0.333333	6.5
CRM1	2015-02-22	31	CR	Cold	Rising	rising	cold	0.388889	0.00185185	1	28	33	5	31.5	-2.5	3.5	0.375	6
CRM1	2015-02-23	32	CR	Cold	Rising	rising	cold	0.390741	0.00185185	1	31.5	33	1.5	32.4375	-2.5	3.5	0.375	6
CRM1	2015-02-24	33	CR	Cold	Rising	rising	cold	0.392593	0.00185185	1	30	34	4	32.4375	-3	3.5	0.333333	6.5
CRM1	2015-02-25	34	CR	Cold	Rising	rising	cold	0.394444	0.00185185	1	29	33.5	4.5	32	-3	3.5	0.333333	6.5
CRM1	2015-02-26	35	CR	Cold	Rising	rising	cold	0.396296	0.00185185	1	28.5	32.5	4	30.875	-3	3.5	0.458333	6.5
CRM1	2015-02-27	36	CR	Cold	Rising	rising	cold	0.398148	0.00185185	1	20	29.5	9.5	25.5625	-3	3.5	0.291667	6.5
CRM1	2015-02-28	37	CR	Cold	Rising	rising	cold	0.4	0.00185185	1	26	31.5	5.5	29.25	-2.5	3.5	0.375	6
CRM1	2015-03-01	38	CR	Cold	Rising	rising	cold	0.401852	0.00185185	1	27	33	6	31.3125	-2.5	3.5	0.375	6
CRM1	2015-03-02	39	CR	Cold	Rising	rising	cold	0.403704	0.00185185	1	23	33.5	10.5	29.9375	-3	3.5	0.333333	6.5
CRM1	2015-03-03	40	CR	Cold	Rising	rising	cold	0.405556	0.00185185	1	27.5	33	5.5	30.375	-3	3.5	0.333333	6.5
CRM1	2015-03-04	41	CR	Cold	Rising	rising	cold	0.407407	0.00185185	1	22	28	6	24.375	-3	3.5	0.333333	6.5
CRM1	2015-03-05	42	CR	Cold	Rising	rising	cold	0.409259	0.00185185	1	24	31	7	27.5625	-3	3.5	0.291667	6.5
CRM1	2015-03-06	43	CR	Cold	Rising	rising	cold	0.411111	0.00185185	1	27.5	32.5	5	30.25	-2.5	3.5	0.375	6
CRM1	2015-03-07	44	CR	Cold	Rising	rising	cold	0.412963	0.00185185	1	30	33	3	31.9375	-2.5	3.5	0.333333	6
CRM1	2015-03-08	45	CR	Cold	Rising	rising	cold	0.414815	0.00185185	1	30.5	33	2.5	32	-3	3.5	0.333333	6.5
CRM1	2015-03-09	46	CR	Cold	Rising	rising	cold	0.416667	0.00185185	1	22	31	9	26.375	-2.5	3.5	0.375	6
CRM1	2015-03-10	47	CR	Cold	Rising	rising	cold2	0.418519	0.00185185	1	23	32	9	28.375	-2.5	3.5	0.375	6
CRM1	2015-03-11	48	CR	Cold	Rising	rising	cold2	0.42037	0.00185185	1	30.5	33	2.5	32.1875	-2.5	3.5	0.375	6
CRM1	2015-03-12	49	CR	Cold	Rising	rising	cold2	0.422222	0.00185185	1	32.5	33.5	1	32.9375	-2.5	3.5	0.375	6
CRM1	2015-03-13	50	CR	Cold	Rising	rising	cold2	0.424074	0.00185185	1	28	33.5	5.5	31.6875	-2.5	3.5	0.375	6
CRM1	2015-03-14	51	CR	Cold	Rising	rising	cold2	0.425926	0.00185185	1	22	31	9	26.3125	-2.5	3.5	0.375	6
CRM1	2015-03-15	52	CR	Cold	Rising	rising	cold2	0.427778	0.00185185	1	25	30.5	5.5	27.75	-2.5	3.5	0.375	6
CRM1	2015-03-16	53	CR	Cold	Rising	rising	cold2	0.42963	0.00185185	1	29	33	4	31.5625	-3	3.5	0.333333	6.5
CRM1	2015-03-17	54	CR	Cold	Rising	rising	cold2	0.431481	0.00185185	1	28	33.5	5.5	31.8125	-2.5	3.5	0.375	6
CRM1	2015-03-18	55	CR	Cold	Rising	rising	cold2	0.433333	0.00185185	1	31	33.5	2.5	32.1875	-2.5	3.5	0.375	6
CRM1	2015-03-19	56	CR	Cold	Rising	rising	cold2	0.435185	0.00185185	1	24.5	32.5	8	29.8125	-2.5	3.5	0.375	6
CRM1	2015-03-20	57	CR	Cold	Rising	rising	cold2	0.437037	0.00185185	1	22.5	27.5	5	25.3125	-2.5	3.5	0.375	6
CRM1	2015-03-21	58	CR	Cold	Rising	rising	cold2	0.438889	0.00185185	1	26	29	3	27.5	-2.5	3.5	0.375	6
CRM1	2015-03-22	59	CR	Cold	Rising	rising	cold2	0.440741	0.00185185	1	28.5	33	4.5	31.4375	-2.5	3.5	0.375	6
CRM1	2015-03-23	60	CR	Cold	Rising	rising	cold2	0.442593	0.00185185	1	31	33	2	32.125	-2.5	3.5	0.375	6
CRM1	2015-03-24	61	CR	Cold	Rising	rising	cold2	0.444444	0.00185185	1	31	33	2	32.125	-2.5	3.5	0.375	6
CRM1	2015-03-25	62	CR	Cold	Rising	rising	cold2	0.446296	0.00185185	1	21.5	27.5	6	24.5625	-2.5	3.5	0.375	6
CRM1	2015-03-26	63	CR	Cold	Rising	rising	cold2	0.448148	0.00185185	1	25	27.5	2.5	26.25	-2.5	3.5	0.375	6
CRM1	2015-03-27	64	CR	Cold	Rising	rising	cold2	0.45	0.00185185	1	29	32	3	30.6875	-2.5	3.5	0.375	6
CRM1	2015-03-28	65	CR	Cold	Rising	rising	cold2	0.451852	0.00185185	1	30	32.5	2.5	31	-2.5	3.5	0.375	6
CRM1	2015-03-29	66	CR	Cold	Rising	rising	cold2	0.453704	0.00185185	1	27.5	31.5	4	29.6875	-2.5	3.5	0.375	6
CRM1	2015-03-30	67	CR	Cold	Rising	rising	cold2	0.455556	0.00185185	1	24	30.5	6.5	26.625	-2.5	3.5	0.375	6
CRM1	2015-03-31	68	CR	Cold	Rising	rising	cold2	0.457407	0.00185185	1	26	30.5	4.5	28.0625	-2.5	3.5	0.375	6
CRM1	2015-04-01	69	CR	Cold	Rising	rising	cold2	0.459259	0.00185185	1	27.5	32	4.5	29.3125	-2.5	3.5	0.375	6
CRM1	2015-04-02	70	CR	Cold	Rising	rising	cold2	0.461111	0.00185185	1	27	32	5	30	-2.5	3.5	0.375	6
CRM1	2015-04-03	71	CR	Cold	Rising	rising	cold2	0.462963	0.00185185	1	23.5	26	2.5	24.625	-2.5	3.5	0.375	6
CRM1	2015-04-04	72	CR	Cold	Rising	rising	cold2	0.464815	0.00185185	1	23	30	7	26.6875	-2.5	3.5	0.375	6
CRM1	2015-04-05	73	CR	Cold	Rising	rising	cold2	0.466667	0.00185185	1	24	28	4	26.125	-2.5	3.5	0.375	6
CRM1	2015-04-06	74	CR	Cold	Rising	rising	cold2	0.468519	0.00185185	1	26	33.5	7.5	28.875	-2.5	3.5	0.375	6
CRM1	2015-04-07	75	CR	Cold	Rising	rising	cold2	0.47037	0.00185185	1	24.5	30.5	6	26.0625	-2.5	3.5	0.375	6
CRM1	2015-04-08	76	CR	Cold	Rising	rising	cold2	0.472222	0.00185185	1	23.5	27	3.5	24.9375	-2.5	3.5	0.333333	6
CRM1	2015-04-09	77	CR	Cold	Rising	rising	cold2	0.474074	0.00185185	1	23	28.5	5.5	25.5625	-2.5	3.5	0.375	6
CRM1	2015-04-10	78	CR	Cold	Rising	rising	cold2	0.475926	0.00185185	1	23.5	28	4.5	25.8125	-3	3.5	-0.0416667	6.5
CRM2	2015-01-26	4	CR	Cold	Rising	rising	cold	0.338889	0.00185185	0	21	29	8	25.375	-3	3.5	0.333333	6.5
CRM2	2015-01-27	5	CR	Cold	Rising	rising	cold	0.340741	0.00185185	0	18	27	9	21.5625	-3	3.5	0.333333	6.5
CRM2	2015-01-28	6	CR	Cold	Rising	rising	cold	0.342593	0.00185185	0	17.5	24.5	7	21	-3	3.5	0.333333	6.5
CRM2	2015-01-29	7	CR	Cold	Rising	rising	cold	0.344444	0.00185185	0	15.5	20.5	5	17.9375	-3	3.5	0.291667	6.5
CRM2	2015-01-30	8	CR	Cold	Rising	rising	cold	0.346296	0.00185185	0	13	20.5	7.5	17.1875	-3	3.5	0.333333	6.5
CRM2	2015-01-31	9	CR	Cold	Rising	rising	cold	0.348148	0.00185185	0	13	14	1	13.3125	-2.5	3.5	0.291667	6
CRM2	2015-02-01	10	CR	Cold	Rising	rising	cold	0.35	0.00185185	0	13	15.5	2.5	14.6875	-3	3.5	0.291667	6.5
CRM2	2015-02-02	11	CR	Cold	Rising	rising	cold	0.351852	0.00185185	0	12	14.5	2.5	13.0625	-2.5	3.5	0.291667	6
CRM2	2015-02-03	12	CR	Cold	Rising	rising	cold	0.353704	0.00185185	0	12	14	2	13	-3	3.5	0.25	6.5
CRM2	2015-02-04	13	CR	Cold	Rising	rising	cold	0.355556	0.00185185	0	11	13.5	2.5	12.25	-3	3.5	0.25	6.5
CRM2	2015-02-05	14	CR	Cold	Rising	rising	cold	0.357407	0.00185185	0	10	13	3	11.6875	-2.5	3.5	0.291667	6
CRM2	2015-02-06	15	CR	Cold	Rising	rising	cold	0.359259	0.00185185	0	9.5	13	3.5	11.5	-3	3.5	0.25	6.5
CRM2	2015-02-07	16	CR	Cold	Rising	rising	cold	0.361111	0.00185185	0	8.5	20	11.5	11.125	-3	3.5	0.25	6.5
CRM2	2015-02-08	17	CR	Cold	Rising	rising	cold	0.362963	0.00185185	0	7	14.5	7.5	8.875	-3	3.5	0.25	6.5
CRM2	2015-02-09	18	CR	Cold	Rising	rising	cold	0.364815	0.00185185	0	1	4.5	3.5	2.1875	-3	3.5	0.25	6.5
CRM2	2015-02-10	19	CR	Cold	Rising	rising	cold	0.366667	0.00185185	0	0	2.5	2.5	1.125	-3	3.5	0.208333	6.5
CRM2	2015-02-11	20	CR	Cold	Rising	rising	cold	0.368519	0.00185185	0	-0.5	2.5	3	1.0625	-3	3.5	0.208333	6.5
CRM2	2015-02-12	21	CR	Cold	Rising	rising	cold	0.37037	0.00185185	0	0	2.5	2.5	1.1875	-3	3.5	0.208333	6.5
CRM2	2015-02-13	22	CR	Cold	Rising	rising	cold	0.372222	0.00185185	0	-0.5	2.5	3	1	-3	3	0.166667	6
CRM2	2015-02-14	23	CR	Cold	Rising	rising	cold	0.374074	0.00185185	0	-0.5	2	2.5	0.875	-3	3	0.166667	6
CRM2	2015-02-15	24	CR	Cold	Rising	rising	cold	0.375926	0.00185185	0	-0.5	2	2.5	0.75	-3	3	0.166667	6
CRM2	2015-02-16	25	CR	Cold	Rising	rising	cold	0.377778	0.00185185	0	-0.5	2	2.5	0.6875	-3	3	0.166667	6
CRM2	2015-02-17	26	CR	Cold	Rising	rising	cold	0.37963	0.00185185	0	-0.5	2	2.5	0.6875	-3	3	0.166667	6
CRM2	2015-02-18	27	CR	Cold	Rising	rising	cold	0.381481	0.00185185	0	-0.5	2	2.5	0.625	-3	3.5	0.166667	6.5
CRM2	2015-02-19	28	CR	Cold	Rising	rising	cold	0.383333	0.00185185	0	-0.5	2	2.5	0.625	-3	3.5	0.166667	6.5
CRM2	2015-02-20	29	CR	Cold	Rising	rising	cold	0.385185	0.00185185	0	-0.5	2	2.5	0.625	-3	3.5	0.166667	6.5
CRM2	2015-02-21	30	CR	Cold	Rising	rising	cold	0.387037	0.00185185	0	-0.5	2	2.5	0.625	-3	3.5	0.25	6.5
CRM2	2015-02-22	31	CR	Cold	Rising	rising	cold	0.388889	0.00185185	0	-0.5	2	2.5	0.625	-3	3	0.125	6
CRM2	2015-02-23	32	CR	Cold	Rising	rising	cold	0.390741	0.00185185	0	-0.5	2	2.5	0.5	-3	3	0.0833333	6
CRM2	2015-02-24	33	CR	Cold	Rising	rising	cold	0.392593	0.00185185	0	-0.5	2	2.5	0.5	-3	3	0.0833333	6
CRM2	2015-02-25	34	CR	Cold	Rising	rising	cold	0.394444	0.00185185	0	-0.5	2	2.5	0.5	-3	3	0.0833333	6
CRM2	2015-02-26	35	CR	Cold	Rising	rising	cold	0.396296	0.00185185	0	-0.5	2	2.5	0.5625	-3	3	0.208333	6
CRM2	2015-02-27	36	CR	Cold	Rising	rising	cold	0.398148	0.00185185	0	-0.5	2	2.5	0.5625	-3	3	0.0833333	6
CRM2	2015-02-28	37	CR	Cold	Rising	rising	cold	0.4	0.00185185	0	-0.5	2	2.5	0.5625	-3	3	0.0833333	6
CRM2	2015-03-01	38	CR	Cold	Rising	rising	cold	0.401852	0.00185185	0	-1	2	3	0.4375	-3	3	0.125	6
CRM2	2015-03-02	39	CR	Cold	Rising	rising	cold	0.403704	0.00185185	0	-1	2	3	0.4375	-3	3	0.0833333	6
CRM2	2015-03-03	40	CR	Cold	Rising	rising	cold	0.405556	0.00185185	0	-1	2	3	0.4375	-3	3	0.0833333	6
CRM2	2015-03-04	41	CR	Cold	Rising	rising	cold	0.407407	0.00185185	0	-0.5	2	2.5	0.5625	-3	3	0.0833333	6
CRM2	2015-03-05	42	CR	Cold	Rising	rising	cold	0.409259	0.00185185	0	-1	2	3	0.5	-3	3	0.0833333	6
CRM2	2015-03-06	43	CR	Cold	Rising	rising	cold	0.411111	0.00185185	0	-1	2	3	0.5	-3	3	0.0833333	6
CRM2	2015-03-07	44	CR	Cold	Rising	rising	cold	0.412963	0.00185185	0	-1	2	3	0.5	-3	3	0.0833333	6
CRM2	2015-03-08	45	CR	Cold	Rising	rising	cold	0.414815	0.00185185	0	-1	2	3	0.5	-3	3	0.0833333	6
CRM2	2015-03-09	46	CR	Cold	Rising	rising	cold	0.416667	0.00185185	0	-1	2	3	0.5	-3	3	0.0833333	6
CRM2	2015-03-10	47	CR	Cold	Rising	rising	cold2	0.418519	0.00185185	0	-1	2	3	0.5	-3	3	0.0833333	6
CRM2	2015-03-11	48	CR	Cold	Rising	rising	cold2	0.42037	0.00185185	0	-1	2	3	0.5	-3	3	0.0833333	6
CRM2	2015-03-12	49	CR	Cold	Rising	rising	cold2	0.422222	0.00185185	0	-1	2	3	0.5	-3	3	0.0833333	6
CRM2	2015-03-13	50	CR	Cold	Rising	rising	cold2	0.424074	0.00185185	0	-1	2	3	0.5	-3	3	0.0833333	6
CRM2	2015-03-14	51	CR	Cold	Rising	rising	cold2	0.425926	0.00185185	0	-1	2	3	0.5	-3	3	0.0833333	6
CRM2	2015-03-15	52	CR	Cold	Rising	rising	cold2	0.427778	0.00185185	0	-1	2	3	0.5	-3	3	0.0833333	6
CRM2	2015-03-16	53	CR	Cold	Rising	rising	cold2	0.42963	0.00185185	0	-1	2	3	0.5	-3	3	0.0833333	6
CRM2	2015-03-17	54	CR	Cold	Rising	rising	cold2	0.431481	0.00185185	0	-1	2	3	0.5	-3	3	0.0833333	6
CRM2	2015-03-18	55	CR	Cold	Rising	rising	cold2	0.433333	0.00185185	0	-1	2	3	0.5	-3	3	0.0416667	6
CRM2	2015-03-19	56	CR	Cold	Rising	rising	cold2	0.435185	0.00185185	0	-1	2	3	0.625	-3	3	0.0833333	6
CRM2	2015-03-20	57	CR	Cold	Rising	rising	cold2	0.437037	0.00185185	0	-1	2	3	0.625	-3	3	0.0833333	6
CRM2	2015-03-21	58	CR	Cold	Rising	rising	cold2	0.438889	0.00185185	0	-1	2	3	0.5	-3	3	0.0833333	6
CRM2	2015-03-22	59	CR	Cold	Rising	rising	cold2	0.440741	0.00185185	0	-1	2	3	0.5625	-3	3	0.0833333	6
CRM2	2015-03-23	60	CR	Cold	Rising	rising	cold2	0.442593	0.00185185	0	-1	2	3	0.5625	-3	3	0.125	6
CRM2	2015-03-24	61	CR	Cold	Rising	rising	cold2	0.444444	0.00185185	0	-1	2	3	0.5	-3	3	0.0833333	6
CRM2	2015-03-25	62	CR	Cold	Rising	rising	cold2	0.446296	0.00185185	0	-1	2	3	0.5	-3	3.5	0.125	6.5
CRM2	2015-03-26	63	CR	Cold	Rising	rising	cold2	0.448148	0.00185185	0	-1	2	3	0.5	-3	3	0.125	6
CRM2	2015-03-27	64	CR	Cold	Rising	rising	cold2	0.45	0.00185185	0	-1	2	3	0.5	-3	3	0.0833333	6
CRM2	2015-03-28	65	CR	Cold	Rising	rising	cold2	0.451852	0.00185185	0	-1	2	3	0.5	-3	3	0.125	6
CRM2	2015-03-29	66	CR	Cold	Rising	rising	cold2	0.453704	0.00185185	0	-1	2	3	0.5	-3	3	0.0833333	6
CRM2	2015-03-30	67	CR	Cold	Rising	rising	cold2	0.455556	0.00185185	0	-1	2	3	0.5625	-3	3	0.0833333	6
CRM2	2015-03-31	68	CR	Cold	Rising	rising	cold2	0.457407	0.00185185	0	-1	2	3	0.5625	-3	3	0.0833333	6
CRM2	2015-04-01	69	CR	Cold	Rising	rising	cold2	0.459259	0.00185185	0	-1	2	3	0.5625	-3	3	0.0833333	6
CRM2	2015-04-02	70	CR	Cold	Rising	rising	cold2	0.461111	0.00185185	0	-1	2	3	0.5625	-3	3	0.125	6
CRM2	2015-04-03	71	CR	Cold	Rising	rising	cold2	0.462963	0.00185185	0	-1	2	3	0.5625	-3	3	0.0833333	6
CRM2	2015-04-04	72	CR	Cold	Rising	rising	cold2	0.464815	0.00185185	0	-1	2	3	0.5625	-3	3	0.0833333	6
CRM2	2015-04-05	73	CR	Cold	Rising	rising	cold2	0.466667	0.00185185	0	-1	2	3	0.5625	-3	3	0.0833333	6
CRM2	2015-04-06	74	CR	Cold	Rising	rising	cold2	0.468519	0.00185185	0	-1	2	3	0.5625	-3	3.5	0.166667	6.5
CRM2	2015-04-07	75	CR	Cold	Rising	rising	cold2	0.47037	0.00185185	0	-1	2.5	3.5	0.625	-3	3	0.166667	6
CRM2	2015-04-08	76	CR	Cold	Rising	rising	cold2	0.472222	0.00185185	0	-1	2.5	3.5	0.75	-3	3.5	0.125	6.5
CRM2	2015-04-09	77	CR	Cold	Rising	rising	cold2	0.474074	0.00185185	0	-1	2.5	3.5	0.75	-3	3.5	0.125	6.5
CRM2	2015-04-10	78	CR	Cold	Rising	rising	cold2	0.475926	0.00185185	0	-1.5	2	3.5	0.4375	-3	3	-0.291667	6
CRM3	2015-01-26	4	CR	Cold	Rising	rising	cold	0.338889	0.00185185	0	20	31	11	25.875	-2.5	4	0.833333	6.5
CRM3	2015-01-27	5	CR	Cold	Rising	rising	cold	0.340741	0.00185185	0	20	28	8	24.0625	-2.5	4	0.791667	6.5
CRM3	2015-01-28	6	CR	Cold	Rising	rising	cold	0.342593	0.00185185	0	21	24.5	3.5	23.3125	-2.5	4	0.833333	6.5
CRM3	2015-01-29	7	CR	Cold	Rising	rising	cold	0.344444	0.00185185	0	19.5	25	5.5	22.25	-2.5	4	0.791667	6.5
CRM3	2015-01-30	8	CR	Cold	Rising	rising	cold	0.346296	0.00185185	0	20.5	24	3.5	21.5	-2.5	4	0.75	6.5
CRM3	2015-01-31	9	CR	Cold	Rising	rising	cold	0.348148	0.00185185	0	18.5	25	6.5	21.75	-2.5	4	0.708333	6.5
CRM3	2015-02-01	10	CR	Cold	Rising	rising	cold	0.35	0.00185185	0	20.5	23.5	3	22.0625	-2.5	4	0.708333	6.5
CRM3	2015-02-02	11	CR	Cold	Rising	rising	cold	0.351852	0.00185185	0	23	28.5	5.5	25.8125	-2.5	4	0.75	6.5
CRM3	2015-02-03	12	CR	Cold	Rising	rising	cold	0.353704	0.00185185	0	25	32.5	7.5	28.875	-2.5	4	0.708333	6.5
CRM3	2015-02-04	13	CR	Cold	Rising	rising	cold	0.355556	0.00185185	0	28	32	4	30.4375	-2.5	4	0.708333	6.5
CRM3	2015-02-05	14	CR	Cold	Rising	rising	cold	0.357407	0.00185185	0	24.5	32	7.5	28.5625	-2.5	4	0.708333	6.5
CRM3	2015-02-06	15	CR	Cold	Rising	rising	cold	0.359259	0.00185185	0	27.5	31.5	4	29.1875	-2.5	4	0.708333	6.5
CRM3	2015-02-07	16	CR	Cold	Rising	rising	cold	0.361111	0.00185185	0	24	30.5	6.5	27.3125	-2.5	4	0.708333	6.5
CRM3	2015-02-08	17	CR	Cold	Rising	rising	cold	0.362963	0.00185185	0	20	26.5	6.5	22.5	-2.5	4	0.708333	6.5
CRM3	2015-02-09	18	CR	Cold	Rising	rising	cold	0.364815	0.00185185	0	15.5	21	5.5	18.4375	-2.5	4	0.75	6.5
CRM3	2015-02-10	19	CR	Cold	Rising	rising	cold	0.366667	0.00185185	0	15	18	3	16.375	-2.5	4	0.708333	6.5
CRM3	2015-02-11	20	CR	Cold	Rising	rising	cold	0.368519	0.00185185	0	12.5	16	3.5	14.75	-2.5	4	0.75	6.5
CRM3	2015-02-12	21	CR	Cold	Rising	rising	cold	0.37037	0.00185185	0	12.5	15.5	3	13.9375	-2.5	4	0.666667	6.5
CRM3	2015-02-13	22	CR	Cold	Rising	rising	cold	0.372222	0.00185185	0	12	16	4	13.4375	-2.5	4	0.708333	6.5
CRM3	2015-02-14	23	CR	Cold	Rising	rising	cold	0.374074	0.00185185	0	16.5	24	7.5	20.0625	-2.5	4	0.666667	6.5
CRM3	2015-02-15	24	CR	Cold	Rising	rising	cold	0.375926	0.00185185	0	23	28.5	5.5	24.8125	-2.5	4	0.625	6.5
CRM3	2015-02-16	25	CR	Cold	Rising	rising	cold	0.377778	0.00185185	0	24.5	30.5	6	27.5	-2.5	4	0.625	6.5
CRM3	2015-02-17	26	CR	Cold	Rising	rising	cold	0.37963	0.00185185	0	22.5	28	5.5	25.3125	-2.5	4	0.666667	6.5
CRM3	2015-02-18	27	CR	Cold	Rising	rising	cold	0.381481	0.00185185	0	18.5	25.5	7	22	-2.5	4	0.666667	6.5
CRM3	2015-02-19	28	CR	Cold	Rising	rising	cold	0.383333	0.00185185	0	18	22	4	19.4375	-2.5	4	0.708333	6.5
CRM3	2015-02-20	29	CR	Cold	Rising	rising	cold	0.385185	0.00185185	0	21	27.5	6.5	22.625	-2.5	4	0.708333	6.5
CRM3	2015-02-21	30	CR	Cold	Rising	rising	cold	0.387037	0.00185185	0	18	23	5	20.3125	-2.5	4	0.708333	6.5
CRM3	2015-02-22	31	CR	Cold	Rising	rising	cold	0.388889	0.00185185	0	16.5	21.5	5	19.5625	-2.5	4	0.791667	6.5
CRM3	2015-02-23	32	CR	Cold	Rising	rising	cold	0.390741	0.00185185	0	11.5	18	6.5	14.9375	-2.5	4	0.708333	6.5
CRM3	2015-02-24	33	CR	Cold	Rising	rising	cold	0.392593	0.00185185	0	8	15	7	10.75	-2.5	4	0.75	6.5
CRM3	2015-02-25	34	CR	Cold	Rising	rising	cold	0.394444	0.00185185	0	10	13	3	10.9375	-2.5	4	0.833333	6.5
CRM3	2015-02-26	35	CR	Cold	Rising	rising	cold	0.396296	0.00185185	0	9.5	13	3.5	10.9375	-2.5	4	0.958333	6.5
CRM3	2015-02-27	36	CR	Cold	Rising	rising	cold	0.398148	0.00185185	0	10	20	10	15.125	-2.5	4	0.666667	6.5
CRM3	2015-02-28	37	CR	Cold	Rising	rising	cold	0.4	0.00185185	0	3	19.5	16.5	8.6875	-2.5	3.5	0.541667	6
CRM3	2015-03-01	38	CR	Cold	Rising	rising	cold	0.401852	0.00185185	0	-1	2.5	3.5	0.8125	-2.5	3.5	0.416667	6
CRM3	2015-03-02	39	CR	Cold	Rising	rising	cold	0.403704	0.00185185	0	-1.5	2.5	4	0.625	-2.5	3.5	0.416667	6
CRM3	2015-03-03	40	CR	Cold	Rising	rising	cold	0.405556	0.00185185	0	-1.5	2.5	4	0.75	-2.5	3.5	0.416667	6
CRM3	2015-03-04	41	CR	Cold	Rising	rising	cold	0.407407	0.00185185	0	-1.5	2.5	4	0.8125	-2.5	3.5	0.416667	6
CRM3	2015-03-05	42	CR	Cold	Rising	rising	cold	0.409259	0.00185185	0	-1.5	2.5	4	0.75	-2.5	3.5	0.416667	6
CRM3	2015-03-06	43	CR	Cold	Rising	rising	cold	0.411111	0.00185185	0	-1.5	2.5	4	0.75	-2.5	3.5	0.416667	6
CRM3	2015-03-07	44	CR	Cold	Rising	rising	cold	0.412963	0.00185185	0	-1.5	2.5	4	0.625	-2.5	3.5	0.416667	6
CRM3	2015-03-08	45	CR	Cold	Rising	rising	cold	0.414815	0.00185185	0	-1.5	2.5	4	0.625	-2.5	3.5	0.416667	6
CRM3	2015-03-09	46	CR	Cold	Rising	rising	cold	0.416667	0.00185185	0	-2	2.5	4.5	0.5	-2.5	3.5	0.458333	6
CRM3	2015-03-10	47	CR	Cold	Rising	rising	cold2	0.418519	0.00185185	0	-2	2.5	4.5	0.5	-2.5	3.5	0.458333	6
CRM3	2015-03-11	48	CR	Cold	Rising	rising	cold2	0.42037	0.00185185	0	-2	2.5	4.5	0.4375	-2.5	3.5	0.416667	6
CRM3	2015-03-12	49	CR	Cold	Rising	rising	cold2	0.422222	0.00185185	0	-2	2.5	4.5	0.4375	-2.5	3.5	0.416667	6
CRM3	2015-03-13	50	CR	Cold	Rising	rising	cold2	0.424074	0.00185185	0	-2	2.5	4.5	0.4375	-2.5	3.5	0.416667	6
CRM3	2015-03-14	51	CR	Cold	Rising	rising	cold2	0.425926	0.00185185	0	-2	2.5	4.5	0.4375	-2.5	3.5	0.458333	6
CRM3	2015-03-15	52	CR	Cold	Rising	rising	cold2	0.427778	0.00185185	0	-2	2.5	4.5	0.4375	-2.5	3.5	0.5	6
CRM3	2015-03-16	53	CR	Cold	Rising	rising	cold2	0.42963	0.00185185	0	-2	2.5	4.5	0.4375	-2.5	3.5	0.458333	6
CRM3	2015-03-17	54	CR	Cold	Rising	rising	cold2	0.431481	0.00185185	0	-2	2.5	4.5	0.4375	-2.5	3.5	0.458333	6
CRM3	2015-03-18	55	CR	Cold	Rising	rising	cold2	0.433333	0.00185185	0	-2	2.5	4.5	0.4375	-2.5	3.5	0.458333	6
CRM3	2015-03-19	56	CR	Cold	Rising	rising	cold2	0.435185	0.00185185	0	-2	2.5	4.5	0.4375	-2.5	3.5	0.5	6
CRM3	2015-03-20	57	CR	Cold	Rising	rising	cold2	0.437037	0.00185185	0	-2	2.5	4.5	0.4375	-2.5	3.5	0.458333	6
CRM3	2015-03-21	58	CR	Cold	Rising	rising	cold2	0.438889	0.00185185	0	-2	2.5	4.5	0.4375	-2.5	3.5	0.5	6
CRM3	2015-03-22	59	CR	Cold	Rising	rising	cold2	0.440741	0.00185185	0	-2	2.5	4.5	0.4375	-2.5	3.5	0.5	6
CRM3	2015-03-23	60	CR	Cold	Rising	rising	cold2	0.442593	0.00185185	0	-2	2.5	4.5	0.4375	-2.5	3.5	0.5	6
CRM3	2015-03-24	61	CR	Cold	Rising	rising	cold2	0.444444	0.00185185	0	-2	2.5	4.5	0.4375	-2.5	3.5	0.5	6
CRM3	2015-03-25	62	CR	Cold	Rising	rising	cold2	0.446296	0.00185185	0	-2	2.5	4.5	0.4375	-2.5	3.5	0.5	6
CRM3	2015-03-26	63	CR	Cold	Rising	rising	cold2	0.448148	0.00185185	0	-2	2.5	4.5	0.4375	-2.5	3.5	0.5	6
CRM3	2015-03-27	64	CR	Cold	Rising	rising	cold2	0.45	0.00185185	0	-2	2.5	4.5	0.4375	-2.5	3.5	0.5	6
CRM3	2015-03-28	65	CR	Cold	Rising	rising	cold2	0.451852	0.00185185	0	-2	2.5	4.5	0.4375	-2.5	3.5	0.5	6
CRM3	2015-03-29	66	CR	Cold	Rising	rising	cold2	0.453704	0.00185185	0	-2	2.5	4.5	0.4375	-2.5	3.5	0.5	6
CRM3	2015-03-30	67	CR	Cold	Rising	rising	cold2	0.455556	0.00185185	0	-2	2.5	4.5	0.4375	-2.5	3.5	0.416667	6
CRM3	2015-03-31	68	CR	Cold	Rising	rising	cold2	0.457407	0.00185185	0	-2	2.5	4.5	0.4375	-2.5	3.5	0.458333	6
CRM3	2015-04-01	69	CR	Cold	Rising	rising	cold2	0.459259	0.00185185	0	-2	2.5	4.5	0.4375	-2.5	3.5	0.458333	6
CRM3	2015-04-02	70	CR	Cold	Rising	rising	cold2	0.461111	0.00185185	0	-2	2.5	4.5	0.4375	-2.5	3.5	0.458333	6
CRM3	2015-04-03	71	CR	Cold	Rising	rising	cold2	0.462963	0.00185185	0	-2	2.5	4.5	0.4375	-2.5	3.5	0.5	6
CRM3	2015-04-04	72	CR	Cold	Rising	rising	cold2	0.464815	0.00185185	0	-2	2.5	4.5	0.4375	-2.5	3.5	0.458333	6
CRM3	2015-04-05	73	CR	Cold	Rising	rising	cold2	0.466667	0.00185185	0	-2	2.5	4.5	0.4375	-2.5	3.5	0.5	6
CRM3	2015-04-06	74	CR	Cold	Rising	rising	cold2	0.468519	0.00185185	0	-2	2.5	4.5	0.4375	-2.5	3.5	0.5	6
CRM3	2015-04-07	75	CR	Cold	Rising	rising	cold2	0.47037	0.00185185	0	-2	2.5	4.5	0.4375	-2.5	3.5	0.458333	6
CRM3	2015-04-08	76	CR	Cold	Rising	rising	cold2	0.472222	0.00185185	0	-2	2.5	4.5	0.4375	-2.5	3.5	0.5	6
CRM3	2015-04-09	77	CR	Cold	Rising	rising	cold2	0.474074	0.00185185	0	-2	2.5	4.5	0.4375	-2.5	3.5	0.458333	6
CRM3	2015-04-10	78	CR	Cold	Rising	rising	cold2	0.475926	0.00185185	0	-2	2.5	4.5	0.25	-2.5	3.5	0.166667	6
CRP1	2015-01-26	4	CR	Cold	Rising	rising	cold	0.338889	0.00185185	1	29.5	32	2.5	30.8125	-3	4	0.166667	7
CRP1	2015-01-27	5	CR	Cold	Rising	rising	cold	0.340741	0.00185185	1	29.5	31.5	2	29.9375	-3	3.5	0.0833333	6.5
CRP1	2015-01-28	6	CR	Cold	Rising	rising	cold	0.342593	0.00185185	1	28	31	3	29.6875	-3	3.5	0.125	6.5
CRP1	2015-01-29	7	CR	Cold	Rising	rising	cold	0.344444	0.00185185	1	28.5	31	2.5	29.375	-3	3.5	0.125	6.5
CRP1	2015-01-30	8	CR	Cold	Rising	rising	cold	0.346296	0.00185185	1	29	31.5	2.5	30.0625	-3	4	0.166667	7
CRP1	2015-01-31	9	CR	Cold	Rising	rising	cold	0.348148	0.00185185	1	28.5	31.5	3	29.75	-3	4	0.166667	7
CRP1	2015-02-01	10	CR	Cold	Rising	rising	cold	0.35	0.00185185	1	29	31	2	29.75	-3	4	0.166667	7
CRP1	2015-02-02	11	CR	Cold	Rising	rising	cold	0.351852	0.00185185	1	28	30	2	29.5	-3	4	0.166667	7
CRP1	2015-02-03	12	CR	Cold	Rising	rising	cold	0.353704	0.00185185	1	29	31	2	29.625	-3	4	0.166667	7
CRP1	2015-02-04	13	CR	Cold	Rising	rising	cold	0.355556	0.00185185	1	27.5	30	2.5	28.75	-3	4	0.166667	7
CRP1	2015-02-05	14	CR	Cold	Rising	rising	cold	0.357407	0.00185185	1	28	30	2	28.8125	-3	4	0.166667	7
CRP1	2015-02-06	15	CR	Cold	Rising	rising	cold	0.359259	0.00185185	1	27.5	32.5	5	29.25	-3	4	0.166667	7
CRP1	2015-02-07	16	CR	Cold	Rising	rising	cold	0.361111	0.00185185	1	27.5	29.5	2	28.5	-3	3.5	0.125	6.5
CRP1	2015-02-08	17	CR	Cold	Rising	rising	cold	0.362963	0.00185185	1	28.5	32.5	4	29.9375	-3	4	0.166667	7
CRP1	2015-02-09	18	CR	Cold	Rising	rising	cold	0.364815	0.00185185	1	27.5	30	2.5	28.625	-3	4	0.166667	7
CRP1	2015-02-10	19	CR	Cold	Rising	rising	cold	0.366667	0.00185185	1	27.5	29.5	2	28.9375	-3	3.5	0.125	6.5
CRP1	2015-02-11	20	CR	Cold	Rising	rising	cold	0.368519	0.00185185	1	28	31.5	3.5	29.5625	-3	4	0.166667	7
CRP1	2015-02-12	21	CR	Cold	Rising	rising	cold	0.37037	0.00185185	1	28	30	2	29	-3	4	0.166667	7
CRP1	2015-02-13	22	CR	Cold	Rising	rising	cold	0.372222	0.00185185	1	28.5	32	3.5	29.3125	-3	4	0.166667	7
CRP1	2015-02-14	23	CR	Cold	Rising	rising	cold	0.374074	0.00185185	1	27.5	29	1.5	28.25	-3	3.5	0.125	6.5
CRP1	2015-02-15	24	CR	Cold	Rising	rising	cold	0.375926	0.00185185	1	27.5	29	1.5	28	-3	3.5	0.125	6.5
CRP1	2015-02-16	25	CR	Cold	Rising	rising	cold	0.377778	0.00185185	1	28	32	4	29	-3	3.5	0.125	6.5
CRP1	2015-02-17	26	CR	Cold	Rising	rising	cold	0.37963	0.00185185	1	27.5	30	2.5	28.75	-3	3.5	0.125	6.5
CRP1	2015-02-18	27	CR	Cold	Rising	rising	cold	0.381481	0.00185185	1	28	32	4	29.375	-3	3.5	0.125	6.5
CRP1	2015-02-19	28	CR	Cold	Rising	rising	cold	0.383333	0.00185185	1	27.5	29	1.5	28.375	-3	3.5	0.166667	6.5
CRP1	2015-02-20	29	CR	Cold	Rising	rising	cold	0.385185	0.00185185	1	28	32	4	29.875	-3	3.5	0.166667	6.5
CRP1	2015-02-21	30	CR	Cold	Rising	rising	cold	0.387037	0.00185185	1	28	31	3	29.375	-3	3.5	0.125	6.5
CRP1	2015-02-22	31	CR	Cold	Rising	rising	cold	0.388889	0.00185185	1	27.5	30	2.5	28.5	-3	3.5	0.125	6.5
CRP1	2015-02-23	32	CR	Cold	Rising	rising	cold	0.390741	0.00185185	1	27.5	29.5	2	28.5	-3	3.5	0.125	6.5
CRP1	2015-02-24	33	CR	Cold	Rising	rising	cold	0.392593	0.00185185	1	27.5	29	1.5	28.0625	-3	3.5	0.125	6.5
CRP1	2015-02-25	34	CR	Cold	Rising	rising	cold	0.394444	0.00185185	1	26.5	29	2.5	27.5625	-3	3.5	0.125	6.5
CRP1	2015-02-26	35	CR	Cold	Rising	rising	cold	0.396296	0.00185185	1	27	32	5	28.6875	-3	3.5	0.25	6.5
CRP1	2015-02-27	36	CR	Cold	Rising	rising	cold	0.398148	0.00185185	1	27	31	4	28.75	-3	3.5	0.166667	6.5
CRP1	2015-02-28	37	CR	Cold	Rising	rising	cold	0.4	0.00185185	1	27	29.5	2.5	28.3125	-3	3.5	0.125	6.5
CRP1	2015-03-01	38	CR	Cold	Rising	rising	cold	0.401852	0.00185185	1	27.5	29	1.5	28.3125	-3	3.5	0.166667	6.5
CRP1	2015-03-02	39	CR	Cold	Rising	rising	cold	0.403704	0.00185185	1	27	30.5	3.5	28.25	-3	3.5	0.166667	6.5
CRP1	2015-03-03	40	CR	Cold	Rising	rising	cold	0.405556	0.00185185	1	27.5	29	1.5	28.25	-3	3.5	0.166667	6.5
CRP1	2015-03-04	41	CR	Cold	Rising	rising	cold	0.407407	0.00185185	1	26.5	28	1.5	27.5	-3	3.5	0.166667	6.5
CRP1	2015-03-05	42	CR	Cold	Rising	rising	cold	0.409259	0.00185185	1	25.5	31	5.5	27.5625	-3	3.5	0.166667	6.5
CRP1	2015-03-06	43	CR	Cold	Rising	rising	cold	0.411111	0.00185185	1	26.5	31	4.5	27.5	-3	3.5	0.166667	6.5
CRP1	2015-03-07	44	CR	Cold	Rising	rising	cold	0.412963	0.00185185	1	26	27.5	1.5	26.75	-3	3.5	0.375	6.5
CRP1	2015-03-08	45	CR	Cold	Rising	rising	cold	0.414815	0.00185185	1	26	29.5	3.5	27.75	-2	3.5	0.75	5.5
CRP1	2015-03-09	46	CR	Cold	Rising	rising	cold	0.416667	0.00185185	1	26.5	32	5.5	28.8125	-2	3.5	0.458333	5.5
CRP1	2015-03-10	47	CR	Cold	Rising	rising	cold2	0.418519	0.00185185	1	28	31.5	3.5	29.5	-3	3.5	0.166667	6.5
CRP1	2015-03-11	48	CR	Cold	Rising	rising	cold2	0.42037	0.00185185	1	28.5	31	2.5	29.5	-3	3.5	0.166667	6.5
CRP1	2015-03-12	49	CR	Cold	Rising	rising	cold2	0.422222	0.00185185	1	29.5	31	1.5	30.125	-3	3.5	0.166667	6.5
CRP1	2015-03-13	50	CR	Cold	Rising	rising	cold2	0.424074	0.00185185	1	29	31	2	29.875	-3	3.5	0.166667	6.5
CRP1	2015-03-14	51	CR	Cold	Rising	rising	cold2	0.425926	0.00185185	1	29	32	3	30.125	-3	3.5	0.166667	6.5
CRP1	2015-03-15	52	CR	Cold	Rising	rising	cold2	0.427778	0.00185185	1	28.5	32.5	4	30.375	-3	3.5	0.208333	6.5
CRP1	2015-03-16	53	CR	Cold	Rising	rising	cold2	0.42963	0.00185185	1	31	33	2	32.25	-3	3.5	0.166667	6.5
CRP1	2015-03-17	54	CR	Cold	Rising	rising	cold2	0.431481	0.00185185	1	31.5	33	1.5	32.0625	-3	3.5	0.166667	6.5
CRP1	2015-03-18	55	CR	Cold	Rising	rising	cold2	0.433333	0.00185185	1	30.5	32	1.5	31.5	-3	3.5	0.166667	6.5
CRP1	2015-03-19	56	CR	Cold	Rising	rising	cold2	0.435185	0.00185185	1	31	33.5	2.5	32	-3	3.5	0.208333	6.5
CRP1	2015-03-20	57	CR	Cold	Rising	rising	cold2	0.437037	0.00185185	1	30.5	32.5	2	31.375	-3	3.5	0.208333	6.5
CRP1	2015-03-21	58	CR	Cold	Rising	rising	cold2	0.438889	0.00185185	1	30.5	32	1.5	31.25	-3	3.5	0.208333	6.5
CRP1	2015-03-22	59	CR	Cold	Rising	rising	cold2	0.440741	0.00185185	1	30.5	33	2.5	31.625	-3	3.5	0.208333	6.5
CRP1	2015-03-23	60	CR	Cold	Rising	rising	cold2	0.442593	0.00185185	1	31	32	1	31.6875	-3	3.5	0.208333	6.5
CRP1	2015-03-24	61	CR	Cold	Rising	rising	cold2	0.444444	0.00185185	1	30.5	33	2.5	31.375	-3	3.5	0.208333	6.5
CRP1	2015-03-25	62	CR	Cold	Rising	rising	cold2	0.446296	0.00185185	1	30.5	32	1.5	31.25	-3	3.5	0.208333	6.5
CRP1	2015-03-26	63	CR	Cold	Rising	rising	cold2	0.448148	0.00185185	1	30	32	2	30.8125	-3	3.5	0.208333	6.5
CRP1	2015-03-27	64	CR	Cold	Rising	rising	cold2	0.45	0.00185185	1	29.5	31.5	2	30.4375	-3	3.5	0.208333	6.5
CRP1	2015-03-28	65	CR	Cold	Rising	rising	cold2	0.451852	0.00185185	1	28.5	31	2.5	30.1875	-3	3.5	0.208333	6.5
CRP1	2015-03-29	66	CR	Cold	Rising	rising	cold2	0.453704	0.00185185	1	27.5	31	3.5	29	-3	3.5	0.208333	6.5
CRP1	2015-03-30	67	CR	Cold	Rising	rising	cold2	0.455556	0.00185185	1	27.5	31.5	4	30.0625	-3	3.5	0.208333	6.5
CRP1	2015-03-31	68	CR	Cold	Rising	rising	cold2	0.457407	0.00185185	1	28.5	32	3.5	30.25	-3	3.5	0.208333	6.5
CRP1	2015-04-01	69	CR	Cold	Rising	rising	cold2	0.459259	0.00185185	1	28.5	33	4.5	30.4375	-3	3.5	0.208333	6.5
CRP1	2015-04-02	70	CR	Cold	Rising	rising	cold2	0.461111	0.00185185	1	29.5	33	3.5	31.6875	-3	3.5	0.208333	6.5
CRP1	2015-04-03	71	CR	Cold	Rising	rising	cold2	0.462963	0.00185185	1	30	31.5	1.5	30.75	-3	3.5	0.208333	6.5
CRP1	2015-04-04	72	CR	Cold	Rising	rising	cold2	0.464815	0.00185185	1	30	32.5	2.5	31	-3	3.5	0.208333	6.5
CRP1	2015-04-05	73	CR	Cold	Rising	rising	cold2	0.466667	0.00185185	1	30.5	33	2.5	31.25	-3	3.5	0.208333	6.5
CRP1	2015-04-06	74	CR	Cold	Rising	rising	cold2	0.468519	0.00185185	1	29	30.5	1.5	29.75	-3	3.5	0.208333	6.5
CRP1	2015-04-07	75	CR	Cold	Rising	rising	cold2	0.47037	0.00185185	1	27	31	4	28.9375	-3	3.5	0.208333	6.5
CRP1	2015-04-08	76	CR	Cold	Rising	rising	cold2	0.472222	0.00185185	1	26.5	30	3.5	28.125	-3	3.5	0.125	6.5
CRP1	2015-04-09	77	CR	Cold	Rising	rising	cold2	0.474074	0.00185185	1	25.5	30.5	5	27.8125	-3	3.5	0.166667	6.5
CRP1	2015-04-10	78	CR	Cold	Rising	rising	cold2	0.475926	0.00185185	1	26	29.5	3.5	27.75	-3.5	3.5	-0.166667	7
WCM1	2015-01-26	4	WC	Warm	Constant	short	cold	0.333333	0	1	24.5	31	6.5	27	-2	3	1.04167	5
WCM1	2015-01-27	5	WC	Warm	Constant	short	cold	0.333333	0	1	23	30.5	7.5	25.9375	-3	3.5	0.125	6.5
WCM1	2015-01-28	6	WC	Warm	Constant	short	cold	0.333333	0	1	24.5	30	5.5	27.4375	-3	3.5	0.208333	6.5
WCM1	2015-01-29	7	WC	Warm	Constant	short	cold	0.333333	0	1	24	31	7	28.375	-3	3.5	0.208333	6.5
WCM1	2015-01-30	8	WC	Warm	Constant	short	cold	0.333333	0	1	24	29	5	26.5	-3	3.5	0.208333	6.5
WCM1	2015-01-31	9	WC	Warm	Constant	short	cold	0.333333	0	1	25	32	7	29.4375	-3	3.5	0.208333	6.5
WCM1	2015-02-01	10	WC	Warm	Constant	short	cold	0.333333	0	1	28	32.5	4.5	30.5	-3	3.5	0.25	6.5
WCM1	2015-02-02	11	WC	Warm	Constant	short	cold	0.333333	0	1	28	33.5	5.5	31.1875	-3	3.5	0.25	6.5
WCM1	2015-02-03	12	WC	Warm	Constant	short	cold	0.333333	0	1	28.5	33	4.5	30.625	-3	3.5	0.291667	6.5
WCM1	2015-02-04	13	WC	Warm	Constant	short	cold	0.333333	0	1	28	33.5	5.5	31.0625	-3	3.5	0.291667	6.5
WCM1	2015-02-05	14	WC	Warm	Constant	short	cold	0.333333	0	1	26	32.5	6.5	29.625	-3	3.5	0.291667	6.5
WCM1	2015-02-06	15	WC	Warm	Constant	short	cold	0.333333	0	1	25.5	32.5	7	29.8125	-3	3.5	0.291667	6.5
WCM1	2015-02-07	16	WC	Warm	Constant	short	cold	0.333333	0	1	28	32.5	4.5	30.625	-3	3.5	0.291667	6.5
WCM1	2015-02-08	17	WC	Warm	Constant	short	cold	0.333333	0	1	25	32.5	7.5	29.25	-3	3.5	0.291667	6.5
WCM1	2015-02-09	18	WC	Warm	Constant	short	cold	0.333333	0	1	23.5	31	7.5	27.6875	-3	3.5	0.291667	6.5
WCM1	2015-02-10	19	WC	Warm	Constant	short	cold	0.333333	0	1	23	29.5	6.5	26	-3	3.5	0.25	6.5
WCM1	2015-02-11	20	WC	Warm	Constant	short	cold	0.333333	0	1	22.5	31	8.5	27.375	-3	3.5	0.25	6.5
WCM1	2015-02-12	21	WC	Warm	Constant	short	cold	0.333333	0	1	24	30	6	26.75	-3	3.5	0.291667	6.5
WCM1	2015-02-13	22	WC	Warm	Constant	short	cold	0.333333	0	1	25	33.5	8.5	30.125	-3	3.5	0.291667	6.5
WCM1	2015-02-14	23	WC	Warm	Constant	short	cold	0.333333	0	1	25.5	32	6.5	28.8125	-3	3.5	0.291667	6.5
WCM1	2015-02-15	24	WC	Warm	Constant	short	cold	0.333333	0	1	24.5	31.5	7	28.6875	-3	3.5	0.291667	6.5
WCM1	2015-02-16	25	WC	Warm	Constant	short	cold	0.333333	0	1	24	31	7	27.375	-3	3.5	0.291667	6.5
WCM1	2015-02-17	26	WC	Warm	Constant	short	cold	0.333333	0	1	24.5	30	5.5	27	-3	3.5	0.291667	6.5
WCM1	2015-02-18	27	WC	Warm	Constant	short	cold	0.333333	0	1	25	30.5	5.5	29.125	-3	3.5	0.291667	6.5
WCM1	2015-02-19	28	WC	Warm	Constant	short	cold	0.333333	0	1	25	32	7	28.8125	-3	3.5	0.291667	6.5
WCM1	2015-02-20	29	WC	Warm	Constant	short	cold	0.333333	0	1	24.5	31.5	7	28.1875	-3	3.5	0.291667	6.5
WCM1	2015-02-21	30	WC	Warm	Constant	short	cold	0.333333	0	1	25	31	6	27.6875	-3	3.5	0.291667	6.5
WCM1	2015-02-22	31	WC	Warm	Constant	short	warm	0.333333	0	1	26	32	6	29.5625	-3	4.5	1	7.5
WCM1	2015-02-23	32	WC	Warm	Constant	short	warm	0.333333	0	1	28.5	32.5	4	30.8125	-2	6	1.875	8
WCM1	2015-02-24	33	WC	Warm	Constant	short	warm	0.333333	0	1	31	32.5	1.5	31.625	-1	6.5	2.79167	7.5
WCM1	2015-02-25	34	WC	Warm	Constant	short	warm	0.333333	0	1	23	32.5	9.5	27.8125	0	7.5	3.75	7.5
WCM1	2015-02-26	35	WC	Warm	Constant	short	warm	0.333333	0	1	26	31.5	5.5	29.375	1	8.5	4.75	7.5
WCM1	2015-02-27	36	WC	Warm	Constant	short	warm	0.333333	0	1	22	30	8	26.6875	2	9.5	5.75	7.5
WCM1	2015-02-28	37	WC	Warm	Constant	short	warm	0.333333	0	1	22	29.5	7.5	24.8125	3	10.5	6.79167	7.5
WCM1	2015-03-01	38	WC	Warm	Constant	short	warm	0.333333	0	1	21.5	29	7.5	25.4375	0.5	11.5	7.33333	11
WCM1	2015-03-02	39	WC	Warm	Constant	short	warm	0.333333	0	1	21.5	28	6.5	24.875	0	12.5	8.83333	12.5
WCM1	2015-03-03	40	WC	Warm	Constant	short	warm	0.333333	0	1	20.5	29	8.5	24.0625	6	14	9.875	8
WCM1	2015-03-04	41	WC	Warm	Constant	short	warm	0.333333	0	1	22.5	27.5	5	25.0625	7	14	10.2917	7
WCM1	2015-03-05	42	WC	Warm	Constant	short	warm	0.333333	0	1	22.5	29.5	7	25.5625	7	14.5	10.2917	7.5
WCM1	2015-03-06	43	WC	Warm	Constant	short	warm	0.333333	0	1	19.5	33	13.5	26.8125	7	14.5	10.3333	7.5
WCM1	2015-03-07	44	WC	Warm	Constant	short	warm	0.333333	0	1	21	29.5	8.5	25.375	7	14	10.2917	7
WCM1	2015-03-08	45	WC	Warm	Constant	short	warm	0.333333	0	1	22	31.5	9.5	26.5	7	14.5	10.3333	7.5
WCM1	2015-03-10	47	WC	Warm	Constant	short	cold2	0.333333	0	1	30	33	3	32	-3	3.5	0	6.5
WCM1	2015-03-11	48	WC	Warm	Constant	short	cold2	0.333333	0	1	26.5	32.5	6	30.3125	-3	3.5	0.208333	6.5
WCM1	2015-03-12	49	WC	Warm	Constant	short	cold2	0.333333	0	1	27	32.5	5.5	30.5	-3	3.5	0.208333	6.5
WCM1	2015-03-13	50	WC	Warm	Constant	short	cold2	0.333333	0	1	26	33	7	30.3125	-3	3.5	0.25	6.5
WCM1	2015-03-14	51	WC	Warm	Constant	short	cold2	0.333333	0	1	26.5	32	5.5	30.3125	-3	3.5	0.25	6.5
WCM1	2015-03-15	52	WC	Warm	Constant	short	cold2	0.333333	0	1	23	33	10	30.1875	-3	3.5	0.25	6.5
WCM1	2015-03-16	53	WC	Warm	Constant	short	cold2	0.333333	0	1	28.5	32.5	4	30.625	-3	3.5	0.25	6.5
WCM1	2015-03-17	54	WC	Warm	Constant	short	cold2	0.333333	0	1	24	32.5	8.5	28.125	-3	3.5	0.333333	6.5
WCM1	2015-03-18	55	WC	Warm	Constant	short	cold2	0.333333	0	1	23.5	31.5	8	28	-3	3.5	0.291667	6.5
WCM1	2015-03-19	56	WC	Warm	Constant	short	cold2	0.333333	0	1	24.5	32	7.5	28.125	-3	3.5	0.25	6.5
WCM1	2015-03-20	57	WC	Warm	Constant	short	cold2	0.333333	0	1	22.5	31	8.5	26.875	-3	3.5	0.333333	6.5
WCM1	2015-03-21	58	WC	Warm	Constant	short	cold2	0.333333	0	1	19	27.5	8.5	23.0625	-3	3.5	0.333333	6.5
WCM1	2015-03-22	59	WC	Warm	Constant	short	cold2	0.333333	0	1	21	26.5	5.5	23.875	-3	3.5	0.333333	6.5
WCM1	2015-03-23	60	WC	Warm	Constant	short	cold2	0.333333	0	1	21	27	6	24.375	-3	3.5	0.333333	6.5
WCM1	2015-03-24	61	WC	Warm	Constant	short	cold2	0.333333	0	1	22	26	4	24.3125	-3	3.5	0.333333	6.5
WCM1	2015-03-25	62	WC	Warm	Constant	short	cold2	0.333333	0	1	24.5	27	2.5	25.6875	-3	3.5	0.333333	6.5
WCM1	2015-03-26	63	WC	Warm	Constant	short	cold2	0.333333	0	1	23.5	32.5	9	27.3125	-3	3.5	0.333333	6.5
WCM1	2015-03-27	64	WC	Warm	Constant	short	cold2	0.333333	0	1	25.5	31	5.5	28.3125	-3	4	0.375	7
WCM1	2015-03-28	65	WC	Warm	Constant	short	cold2	0.333333	0	1	28.5	31.5	3	30.4375	-3	4	0.416667	7
WCM1	2015-03-29	66	WC	Warm	Constant	short	cold2	0.333333	0	1	28	32.5	4.5	30.6875	-2.5	4	0.458333	6.5
WCM1	2015-03-30	67	WC	Warm	Constant	short	cold2	0.333333	0	1	28	32	4	30.625	-2.5	4	0.458333	6.5
WCM1	2015-03-31	68	WC	Warm	Constant	short	cold2	0.333333	0	1	27	32	5	29.5	-2.5	4	0.458333	6.5
WCM1	2015-04-01	69	WC	Warm	Constant	short	cold2	0.333333	0	1	28.5	30	1.5	29.1875	-2.5	3.5	0.416667	6
WCM1	2015-04-02	70	WC	Warm	Constant	short	cold2	0.333333	0	1	29	33	4	31	-2.5	4	0.458333	6.5
WCM1	2015-04-03	71	WC	Warm	Constant	short	cold2	0.333333	0	1	27.5	32.5	5	31.0625	-2.5	4	0.458333	6.5
WCM1	2015-04-04	72	WC	Warm	Constant	short	cold2	0.333333	0	1	24.5	32	7.5	29.3125	-2.5	3.5	0.416667	6
WCM1	2015-04-05	73	WC	Warm	Constant	short	cold2	0.333333	0	1	24	31.5	7.5	27.6875	-2.5	3.5	0.416667	6
WCM1	2015-04-06	74	WC	Warm	Constant	short	cold2	0.333333	0	1	20.5	27.5	7	23.625	-2.5	4	0.5	6.5
WCM1	2015-04-07	75	WC	Warm	Constant	short	cold2	0.333333	0	1	20.5	28	7.5	24.625	-2.5	4	0.541667	6.5
WCM2	2015-01-26	4	WC	Warm	Constant	short	cold	0.333333	0	0	21	28	7	25.6875	-2	3	0.958333	5
WCM2	2015-01-27	5	WC	Warm	Constant	short	cold	0.333333	0	0	21	27	6	24.5625	-3	3	-0.125	6
WCM2	2015-01-28	6	WC	Warm	Constant	short	cold	0.333333	0	0	21	25.5	4.5	23.125	-3	3	-0.125	6
WCM2	2015-01-29	7	WC	Warm	Constant	short	cold	0.333333	0	0	17	31.5	14.5	22.875	-3	3.5	-0.0833333	6.5
WCM2	2015-01-30	8	WC	Warm	Constant	short	cold	0.333333	0	0	18	22	4	20.25	-3	3.5	-0.0833333	6.5
WCM2	2015-01-31	9	WC	Warm	Constant	short	cold	0.333333	0	0	17	26	9	21	-3	3.5	-0.0833333	6.5
WCM2	2015-02-01	10	WC	Warm	Constant	short	cold	0.333333	0	0	15.5	23.5	8	19.375	-3	3.5	-0.0833333	6.5
WCM2	2015-02-02	11	WC	Warm	Constant	short	cold	0.333333	0	0	15	25.5	10.5	19.5625	-3	3.5	-0.0833333	6.5
WCM2	2015-02-03	12	WC	Warm	Constant	short	cold	0.333333	0	0	16	29	13	22.375	-3	3.5	-0.0833333	6.5
WCM2	2015-02-04	13	WC	Warm	Constant	short	cold	0.333333	0	0	16.5	22	5.5	19.125	-3	3.5	-0.0833333	6.5
WCM2	2015-02-05	14	WC	Warm	Constant	short	cold	0.333333	0	0	18	23.5	5.5	20.5625	-3	3.5	-0.0833333	6.5
WCM2	2015-02-06	15	WC	Warm	Constant	short	cold	0.333333	0	0	17.5	31	13.5	22.25	-3	3.5	-0.0833333	6.5
WCM2	2015-02-07	16	WC	Warm	Constant	short	cold	0.333333	0	0	13	25	12	18.5	-3	3.5	-0.0833333	6.5
WCM2	2015-02-08	17	WC	Warm	Constant	short	cold	0.333333	0	0	12.5	20	7.5	16.6875	-3	3.5	-0.0416667	6.5
WCM2	2015-02-09	18	WC	Warm	Constant	short	cold	0.333333	0	0	14.5	22	7.5	18.625	-3	3.5	-0.0416667	6.5
WCM2	2015-02-10	19	WC	Warm	Constant	short	cold	0.333333	0	0	17	28.5	11.5	21.875	-3	3.5	-0.0833333	6.5
WCM2	2015-02-11	20	WC	Warm	Constant	short	cold	0.333333	0	0	16	24.5	8.5	19.375	-3	3.5	-0.0416667	6.5
WCM2	2015-02-12	21	WC	Warm	Constant	short	cold	0.333333	0	0	14	22.5	8.5	19.75	-3	3.5	-0.0416667	6.5
WCM2	2015-02-13	22	WC	Warm	Constant	short	cold	0.333333	0	0	16	21	5	18.625	-3	3.5	-0.0416667	6.5
WCM2	2015-02-14	23	WC	Warm	Constant	short	cold	0.333333	0	0	15	20	5	17.9375	-3	3.5	-0.0416667	6.5
WCM2	2015-02-15	24	WC	Warm	Constant	short	cold	0.333333	0	0	13	23	10	16.5	-3	3.5	0	6.5
WCM2	2015-02-16	25	WC	Warm	Constant	short	cold	0.333333	0	0	13.5	21.5	8	16.8125	-3	3.5	-0.0416667	6.5
WCM2	2015-02-17	26	WC	Warm	Constant	short	cold	0.333333	0	0	14	22	8	16.5625	-3	3.5	-0.0833333	6.5
WCM2	2015-02-18	27	WC	Warm	Constant	short	cold	0.333333	0	0	13.5	22	8.5	17.25	-3	3.5	-0.0416667	6.5
WCM2	2015-02-19	28	WC	Warm	Constant	short	cold	0.333333	0	0	13	21	8	16.375	-3	3.5	-0.0416667	6.5
WCM2	2015-02-20	29	WC	Warm	Constant	short	cold	0.333333	0	0	12.5	23	10.5	16.4375	-3	3.5	-0.0416667	6.5
WCM2	2015-02-21	30	WC	Warm	Constant	short	cold	0.333333	0	0	12	16.5	4.5	14.125	-3	3.5	-0.0416667	6.5
WCM2	2015-02-22	31	WC	Warm	Constant	short	warm	0.333333	0	0	11	17	6	13.4375	-3	4.5	0.708333	7.5
WCM2	2015-02-23	32	WC	Warm	Constant	short	warm	0.333333	0	0	11	14	3	12.625	-2	5.5	1.625	7.5
WCM2	2015-02-24	33	WC	Warm	Constant	short	warm	0.333333	0	0	12.5	14.5	2	13.625	-1	6.5	2.625	7.5
WCM2	2015-02-25	34	WC	Warm	Constant	short	warm	0.333333	0	0	14	19.5	5.5	15.9375	0	7.5	3.58333	7.5
WCM2	2015-02-26	35	WC	Warm	Constant	short	warm	0.333333	0	0	14.5	22.5	8	16.9375	0.5	8.5	4.54167	8
WCM2	2015-02-27	36	WC	Warm	Constant	short	warm	0.333333	0	0	14	21	7	16.75	1.5	9.5	5.5	8
WCM2	2015-02-28	37	WC	Warm	Constant	short	warm	0.333333	0	0	13	20	7	15.5625	2.5	10.5	6.54167	8
WCM2	2015-03-01	38	WC	Warm	Constant	short	warm	0.333333	0	0	15.5	25.5	10	19.5	1	11.5	7.125	10.5
WCM2	2015-03-02	39	WC	Warm	Constant	short	warm	0.333333	0	0	16	25	9	20.125	-0.5	13	8.79167	13.5
WCM2	2015-03-03	40	WC	Warm	Constant	short	warm	0.333333	0	0	16	25	9	20.25	6	14.5	9.75	8.5
WCM2	2015-03-04	41	WC	Warm	Constant	short	warm	0.333333	0	0	15	27	12	20.6875	6.5	14.5	10.0833	8
WCM2	2015-03-05	42	WC	Warm	Constant	short	warm	0.333333	0	0	16	28	12	21.0625	6.5	14	10.0833	7.5
WCM2	2015-03-06	43	WC	Warm	Constant	short	warm	0.333333	0	0	18.5	24	5.5	20.875	6.5	14	10.0417	7.5
WCM2	2015-03-07	44	WC	Warm	Constant	short	warm	0.333333	0	0	16.5	23	6.5	18.9375	7	14	10.0833	7
WCM2	2015-03-08	45	WC	Warm	Constant	short	warm	0.333333	0	0	16.5	28.5	12	21.25	6.5	14	10.0417	7.5
WCM2	2015-03-10	47	WC	Warm	Constant	short	cold2	0.333333	0	0	24.5	32	7.5	26.8125	-3	3	-0.291667	6
WCM2	2015-03-11	48	WC	Warm	Constant	short	cold2	0.333333	0	0	21	27	6	23.8125	-3	3	-0.166667	6
WCM2	2015-03-12	49	WC	Warm	Constant	short	cold2	0.333333	0	0	20.5	27	6.5	22.375	-3	3	-0.166667	6
WCM2	2015-03-13	50	WC	Warm	Constant	short	cold2	0.333333	0	0	18	25.5	7.5	21.0625	-3	3	-0.166667	6
WCM2	2015-03-14	51	WC	Warm	Constant	short	cold2	0.333333	0	0	14	23	9	17.1875	-3	3	-0.125	6
WCM2	2015-03-15	52	WC	Warm	Constant	short	cold2	0.333333	0	0	12	21	9	14.5625	-3	3.5	-0.0416667	6.5
WCM2	2015-03-16	53	WC	Warm	Constant	short	cold2	0.333333	0	0	13.5	24.5	11	16.3125	-3	3	-0.0833333	6
WCM2	2015-03-17	54	WC	Warm	Constant	short	cold2	0.333333	0	0	11	21	10	14	-3	3.5	-0.0416667	6.5
WCM2	2015-03-18	55	WC	Warm	Constant	short	cold2	0.333333	0	0	10.5	19.5	9	12.5	-3	3.5	-0.0416667	6.5
WCM2	2015-03-19	56	WC	Warm	Constant	short	cold2	0.333333	0	0	9.5	18	8.5	12.1875	-3	3.5	-0.0416667	6.5
WCM2	2015-03-20	57	WC	Warm	Constant	short	cold2	0.333333	0	0	8	13	5	9.5	-3	3.5	-0.0416667	6.5
WCM2	2015-03-21	58	WC	Warm	Constant	short	cold2	0.333333	0	0	7	8.5	1.5	7.8125	-3	3.5	-0.0416667	6.5
WCM2	2015-03-22	59	WC	Warm	Constant	short	cold2	0.333333	0	0	6	16.5	10.5	10.1875	-3	3.5	-0.0416667	6.5
WCM2	2015-03-23	60	WC	Warm	Constant	short	cold2	0.333333	0	0	8	12	4	8.9375	-3	3.5	-0.0416667	6.5
WCM2	2015-03-24	61	WC	Warm	Constant	short	cold2	0.333333	0	0	7.5	13.5	6	9.6875	-3	3.5	-0.0416667	6.5
WCM2	2015-03-25	62	WC	Warm	Constant	short	cold2	0.333333	0	0	7.5	9	1.5	8	-3	3.5	0	6.5
WCM2	2015-03-26	63	WC	Warm	Constant	short	cold2	0.333333	0	0	6	7.5	1.5	6.875	-3	3.5	0.125	6.5
WCM2	2015-03-27	64	WC	Warm	Constant	short	cold2	0.333333	0	0	6.5	9.5	3	7.6875	-3	3.5	0.125	6.5
WCM2	2015-03-28	65	WC	Warm	Constant	short	cold2	0.333333	0	0	5	7.5	2.5	6.0625	-3	3.5	0.166667	6.5
WCM2	2015-03-29	66	WC	Warm	Constant	short	cold2	0.333333	0	0	5.5	7	1.5	6.1875	-3	4	0.375	7
WCM2	2015-03-30	67	WC	Warm	Constant	short	cold2	0.333333	0	0	4.5	17	12.5	8.75	-3	4	0.375	7
WCM2	2015-03-31	68	WC	Warm	Constant	short	cold2	0.333333	0	0	7	14	7	10.75	-3	4	0.333333	7
WCM2	2015-04-01	69	WC	Warm	Constant	short	cold2	0.333333	0	0	10	20	10	12.875	-3	3.5	0.291667	6.5
WCM2	2015-04-02	70	WC	Warm	Constant	short	cold2	0.333333	0	0	4	6.5	2.5	5.3125	-3	3.5	0.291667	6.5
WCM2	2015-04-03	71	WC	Warm	Constant	short	cold2	0.333333	0	0	-0.5	3.5	4	1.625	-3	4	0.375	7
WCM2	2015-04-04	72	WC	Warm	Constant	short	cold2	0.333333	0	0	-1	3.5	4.5	1.25	-3	3.5	0.333333	6.5
WCM2	2015-04-05	73	WC	Warm	Constant	short	cold2	0.333333	0	0	-1	3.5	4.5	1.25	-3	3.5	0.333333	6.5
WCM2	2015-04-06	74	WC	Warm	Constant	short	cold2	0.333333	0	0	-1	3.5	4.5	1.4375	-3	3.5	0.333333	6.5
WCM2	2015-04-07	75	WC	Warm	Constant	short	cold2	0.333333	0	0	-1	3.5	4.5	1.375	-3	3.5	0.333333	6.5
WCP1	2015-01-26	4	WC	Warm	Constant	short	cold	0.333333	0	1	29	32	3	30.0625	-2	3	1.125	5
WCP1	2015-01-27	5	WC	Warm	Constant	short	cold	0.333333	0	1	29.5	33.5	4	31.4375	-3	3.5	0.0416667	6.5
WCP1	2015-01-28	6	WC	Warm	Constant	short	cold	0.333333	0	1	29.5	33.5	4	31.625	-3	3.5	0.0416667	6.5
WCP1	2015-01-29	7	WC	Warm	Constant	short	cold	0.333333	0	1	24.5	33	8.5	31	-3	3.5	0.0416667	6.5
WCP1	2015-01-30	8	WC	Warm	Constant	short	cold	0.333333	0	1	26.5	33	6.5	30.4375	-3	3.5	0.0833333	6.5
WCP1	2015-01-31	9	WC	Warm	Constant	short	cold	0.333333	0	1	27.5	33	5.5	30.4375	-3	3.5	0.0833333	6.5
WCP1	2015-02-01	10	WC	Warm	Constant	short	cold	0.333333	0	1	30	33.5	3.5	30.9375	-3	3.5	0.0833333	6.5
WCP1	2015-02-02	11	WC	Warm	Constant	short	cold	0.333333	0	1	28.5	33	4.5	31.0625	-3	3.5	0.125	6.5
WCP1	2015-02-03	12	WC	Warm	Constant	short	cold	0.333333	0	1	29	33	4	30.6875	-3	3.5	0.125	6.5
WCP1	2015-02-04	13	WC	Warm	Constant	short	cold	0.333333	0	1	31	33	2	31.8125	-3	3.5	0.166667	6.5
WCP1	2015-02-05	14	WC	Warm	Constant	short	cold	0.333333	0	1	29	32	3	30.875	-3	3.5	0.125	6.5
WCP1	2015-02-06	15	WC	Warm	Constant	short	cold	0.333333	0	1	31	33	2	32.3125	-3	3.5	0.166667	6.5
WCP1	2015-02-07	16	WC	Warm	Constant	short	cold	0.333333	0	1	30	32.5	2.5	31.0625	-3	3.5	0.166667	6.5
WCP1	2015-02-08	17	WC	Warm	Constant	short	cold	0.333333	0	1	30	31.5	1.5	31	-3	3.5	0.166667	6.5
WCP1	2015-02-09	18	WC	Warm	Constant	short	cold	0.333333	0	1	31	32.5	1.5	31.75	-3	3.5	0.166667	6.5
WCP1	2015-02-10	19	WC	Warm	Constant	short	cold	0.333333	0	1	30	31.5	1.5	30.9375	-3	3.5	0.166667	6.5
WCP1	2015-02-11	20	WC	Warm	Constant	short	cold	0.333333	0	1	30.5	32.5	2	31.5625	-3	3.5	0.166667	6.5
WCP1	2015-02-12	21	WC	Warm	Constant	short	cold	0.333333	0	1	30	32	2	30.6875	-3	3.5	0.166667	6.5
WCP1	2015-02-13	22	WC	Warm	Constant	short	cold	0.333333	0	1	30.5	32	1.5	31.4375	-3	3.5	0.166667	6.5
WCP1	2015-02-14	23	WC	Warm	Constant	short	cold	0.333333	0	1	30.5	32.5	2	31.3125	-3	3.5	0.166667	6.5
WCP1	2015-02-15	24	WC	Warm	Constant	short	cold	0.333333	0	1	30	32	2	31.0625	-3	3.5	0.166667	6.5
WCP1	2015-02-16	25	WC	Warm	Constant	short	cold	0.333333	0	1	30	33	3	31.4375	-3	3.5	0.166667	6.5
WCP1	2015-02-17	26	WC	Warm	Constant	short	cold	0.333333	0	1	30.5	32	1.5	31.25	-3	3.5	0.166667	6.5
WCP1	2015-02-18	27	WC	Warm	Constant	short	cold	0.333333	0	1	31	33	2	32.375	-3	3.5	0.166667	6.5
WCP1	2015-02-19	28	WC	Warm	Constant	short	cold	0.333333	0	1	30	32.5	2.5	31.0625	-3	3.5	0.166667	6.5
WCP1	2015-02-20	29	WC	Warm	Constant	short	cold	0.333333	0	1	30.5	33	2.5	31.625	-3	3.5	0.166667	6.5
WCP1	2015-02-21	30	WC	Warm	Constant	short	cold	0.333333	0	1	30.5	32.5	2	31.375	-3	3.5	0.166667	6.5
WCP1	2015-02-22	31	WC	Warm	Constant	short	warm	0.333333	0	1	30.5	32	1.5	31.25	-3	4.5	0.833333	7.5
WCP1	2015-02-23	32	WC	Warm	Constant	short	warm	0.333333	0	1	30.5	32	1.5	31	-2	5.5	1.75	7.5
WCP1	2015-02-24	33	WC	Warm	Constant	short	warm	0.333333	0	1	30	31	1	30.5	-1	6.5	2.70833	7.5
WCP1	2015-02-25	34	WC	Warm	Constant	short	warm	0.333333	0	1	30	32	2	31.0625	0	7.5	3.625	7.5
WCP1	2015-02-26	35	WC	Warm	Constant	short	warm	0.333333	0	1	32.5	33.5	1	32.9375	1	8.5	4.625	7.5
WCP1	2015-02-27	36	WC	Warm	Constant	short	warm	0.333333	0	1	32	33.5	1.5	32.6875	2	9.5	5.625	7.5
WCP1	2015-02-28	37	WC	Warm	Constant	short	warm	0.333333	0	1	33	33.5	0.5	33.125	3	10.5	6.625	7.5
WCP1	2015-03-01	38	WC	Warm	Constant	short	warm	0.333333	0	1	32	33	1	32.5	1.5	11.5	7.20833	10
WCP1	2015-03-02	39	WC	Warm	Constant	short	warm	0.333333	0	1	32	33.5	1.5	32.8125	-0.5	12.5	8.70833	13
WCP1	2015-03-03	40	WC	Warm	Constant	short	warm	0.333333	0	1	33	33.5	0.5	33.3125	6	14.5	9.83333	8.5
WCP1	2015-03-04	41	WC	Warm	Constant	short	warm	0.333333	0	1	33	34	1	33.5625	7	14	10.1667	7
WCP1	2015-03-05	42	WC	Warm	Constant	short	warm	0.333333	0	1	33.5	34	0.5	33.5625	7	14	10.1667	7
WCP1	2015-03-06	43	WC	Warm	Constant	short	warm	0.333333	0	1	33.5	34	0.5	33.8125	7	14	10.1667	7
WCP1	2015-03-07	44	WC	Warm	Constant	short	warm	0.333333	0	1	33.5	34	0.5	33.8125	7	14	10.1667	7
WCP1	2015-03-08	45	WC	Warm	Constant	short	warm	0.333333	0	1	33.5	34	0.5	33.875	7	14.5	10.2083	7.5
WCP1	2015-03-10	47	WC	Warm	Constant	short	cold2	0.333333	0	1	34	34.5	0.5	34.3125	-3	3.5	-0.125	6.5
WCP1	2015-03-11	48	WC	Warm	Constant	short	cold2	0.333333	0	1	34	35	1	34.4375	-3	3.5	0.0833333	6.5
WCP1	2015-03-12	49	WC	Warm	Constant	short	cold2	0.333333	0	1	34	34.5	0.5	34.4375	-3	3.5	0.0833333	6.5
WCP1	2015-03-13	50	WC	Warm	Constant	short	cold2	0.333333	0	1	34.5	34.5	0	34.5	-3	3.5	0.0833333	6.5
WCP1	2015-03-14	51	WC	Warm	Constant	short	cold2	0.333333	0	1	34.5	35	0.5	34.625	-3	3.5	0.0833333	6.5
WCP1	2015-03-15	52	WC	Warm	Constant	short	cold2	0.333333	0	1	34	34.5	0.5	34.4375	-3	3.5	0.0833333	6.5
WCP1	2015-03-16	53	WC	Warm	Constant	short	cold2	0.333333	0	1	34.5	34.5	0	34.5	-3	3.5	0.0833333	6.5
WCP1	2015-03-17	54	WC	Warm	Constant	short	cold2	0.333333	0	1	34.5	34.5	0	34.5	-3	3.5	0.0833333	6.5
WCP1	2015-03-18	55	WC	Warm	Constant	short	cold2	0.333333	0	1	34	35	1	34.5	-3	3.5	0.0833333	6.5
WCP1	2015-03-19	56	WC	Warm	Constant	short	cold2	0.333333	0	1	34	34.5	0.5	34.1875	-3	3.5	0.0833333	6.5
WCP1	2015-03-20	57	WC	Warm	Constant	short	cold2	0.333333	0	1	34	34	0	34	-3	3.5	0.0833333	6.5
WCP1	2015-03-21	58	WC	Warm	Constant	short	cold2	0.333333	0	1	33.5	34	0.5	33.875	-3	3.5	0.0833333	6.5
WCP1	2015-03-22	59	WC	Warm	Constant	short	cold2	0.333333	0	1	34	34.5	0.5	34.125	-3	3.5	0.0833333	6.5
WCP1	2015-03-23	60	WC	Warm	Constant	short	cold2	0.333333	0	1	33.5	34	0.5	33.875	-3	3.5	0.0833333	6.5
WCP1	2015-03-24	61	WC	Warm	Constant	short	cold2	0.333333	0	1	33.5	34.5	1	34	-3	3.5	0.0833333	6.5
WCP1	2015-03-25	62	WC	Warm	Constant	short	cold2	0.333333	0	1	33	34	1	33.4375	-3	4	0.25	7
WCP1	2015-03-26	63	WC	Warm	Constant	short	cold2	0.333333	0	1	32.5	34	1.5	33.5	-3	4	0.25	7
WCP1	2015-03-27	64	WC	Warm	Constant	short	cold2	0.333333	0	1	32.5	33.5	1	32.875	-3	4	0.333333	7
WCP1	2015-03-28	65	WC	Warm	Constant	short	cold2	0.333333	0	1	31.5	32.5	1	32	-3	4	0.375	7
WCP1	2015-03-29	66	WC	Warm	Constant	short	cold2	0.333333	0	1	29	32.5	3.5	30.875	-3	4	0.375	7
WCP1	2015-03-30	67	WC	Warm	Constant	short	cold2	0.333333	0	1	29.5	32.5	3	30.8125	-3	4	0.375	7
WCP1	2015-03-31	68	WC	Warm	Constant	short	cold2	0.333333	0	1	28.5	31	2.5	29.5625	-3	4	0.375	7
WCP1	2015-04-01	69	WC	Warm	Constant	short	cold2	0.333333	0	1	28	31.5	3.5	29.6875	-3	4	0.375	7
WCP1	2015-04-02	70	WC	Warm	Constant	short	cold2	0.333333	0	1	27.5	31.5	4	29.875	-3	4	0.416667	7
WCP1	2015-04-03	71	WC	Warm	Constant	short	cold2	0.333333	0	1	27	30.5	3.5	28.625	-3	4	0.458333	7
WCP1	2015-04-04	72	WC	Warm	Constant	short	cold2	0.333333	0	1	26.5	31	4.5	28.5625	-3	4	0.458333	7
WCP1	2015-04-05	73	WC	Warm	Constant	short	cold2	0.333333	0	1	26.5	29	2.5	27.5	-3	4	0.458333	7
WCP1	2015-04-06	74	WC	Warm	Constant	short	cold2	0.333333	0	1	25.5	29.5	4	27.0625	-3	4	0.458333	7
WCP1	2015-04-07	75	WC	Warm	Constant	short	cold2	0.333333	0	1	27.5	33	5.5	30.5625	-3	4	0.5	7
WCP2	2015-01-26	4	WC	Warm	Constant	short	cold	0.333333	0	1	19.5	34.5	15	30.625	-2	2.5	0.875	4.5
WCP2	2015-01-27	5	WC	Warm	Constant	short	cold	0.333333	0	1	29.5	33.5	4	32.1875	-3	3	-0.125	6
WCP2	2015-01-28	6	WC	Warm	Constant	short	cold	0.333333	0	1	27.5	33.5	6	31.375	-3	3	-0.125	6
WCP2	2015-01-29	7	WC	Warm	Constant	short	cold	0.333333	0	1	31	34.5	3.5	32.9375	-3	3	-0.0833333	6
WCP2	2015-01-30	8	WC	Warm	Constant	short	cold	0.333333	0	1	31	34	3	32.75	-3	3	-0.0833333	6
WCP2	2015-01-31	9	WC	Warm	Constant	short	cold	0.333333	0	1	31.5	33.5	2	32.625	-3	3	-0.0833333	6
WCP2	2015-02-01	10	WC	Warm	Constant	short	cold	0.333333	0	1	29	33.5	4.5	32.25	-3	3	-0.0833333	6
WCP2	2015-02-02	11	WC	Warm	Constant	short	cold	0.333333	0	1	29	33.5	4.5	32.4375	-3	3	-0.0833333	6
WCP2	2015-02-03	12	WC	Warm	Constant	short	cold	0.333333	0	1	27	34	7	31.875	-3	3	-0.0833333	6
WCP2	2015-02-04	13	WC	Warm	Constant	short	cold	0.333333	0	1	29.5	33.5	4	32.3125	-3	3	-0.0833333	6
WCP2	2015-02-05	14	WC	Warm	Constant	short	cold	0.333333	0	1	25.5	34	8.5	31.1875	-3	3	-0.0833333	6
WCP2	2015-02-06	15	WC	Warm	Constant	short	cold	0.333333	0	1	29	34	5	32.25	-3	3	-0.0833333	6
WCP2	2015-02-07	16	WC	Warm	Constant	short	cold	0.333333	0	1	26.5	33.5	7	30.5625	-3	3	-0.0833333	6
WCP2	2015-02-08	17	WC	Warm	Constant	short	cold	0.333333	0	1	29.5	33.5	4	32.0625	-3	3	-0.0833333	6
WCP2	2015-02-09	18	WC	Warm	Constant	short	cold	0.333333	0	1	27.5	33.5	6	31.4375	-3	3	-0.0416667	6
WCP2	2015-02-10	19	WC	Warm	Constant	short	cold	0.333333	0	1	30	33.5	3.5	31.8125	-3	3	-0.0833333	6
WCP2	2015-02-11	20	WC	Warm	Constant	short	cold	0.333333	0	1	29.5	34.5	5	32.0625	-3	3	-0.0833333	6
WCP2	2015-02-12	21	WC	Warm	Constant	short	cold	0.333333	0	1	25.5	32.5	7	28.8125	-3	3	-0.0833333	6
WCP2	2015-02-13	22	WC	Warm	Constant	short	cold	0.333333	0	1	25.5	33	7.5	31	-3	3	-0.0833333	6
WCP2	2015-02-14	23	WC	Warm	Constant	short	cold	0.333333	0	1	32	34	2	32.75	-3	3	-0.0833333	6
WCP2	2015-02-15	24	WC	Warm	Constant	short	cold	0.333333	0	1	25.5	31.5	6	28.1875	-3	3	-0.0833333	6
WCP2	2015-02-16	25	WC	Warm	Constant	short	cold	0.333333	0	1	27	31.5	4.5	30.0625	-3	3	-0.0833333	6
WCP2	2015-02-17	26	WC	Warm	Constant	short	cold	0.333333	0	1	27	33	6	30.25	-3	3	-0.0833333	6
WCP2	2015-02-18	27	WC	Warm	Constant	short	cold	0.333333	0	1	24.5	32.5	8	28.9375	-3	3	-0.0833333	6
WCP2	2015-02-19	28	WC	Warm	Constant	short	cold	0.333333	0	1	26	32	6	30	-3	3.5	-0.0416667	6.5
WCP2	2015-02-20	29	WC	Warm	Constant	short	cold	0.333333	0	1	24.5	31	6.5	27.6875	-3	3	-0.0833333	6
WCP2	2015-02-21	30	WC	Warm	Constant	short	cold	0.333333	0	1	27	30	3	28.75	-3	3.5	-0.0416667	6.5
WCP2	2015-02-22	31	WC	Warm	Constant	short	warm	0.333333	0	1	28.5	34	5.5	31.3125	-3	4.5	0.666667	7.5
WCP2	2015-02-23	32	WC	Warm	Constant	short	warm	0.333333	0	1	33	34.5	1.5	33.8125	-2	5.5	1.66667	7.5
WCP2	2015-02-24	33	WC	Warm	Constant	short	warm	0.333333	0	1	32	34	2	33.0625	-1	6.5	2.58333	7.5
WCP2	2015-02-25	34	WC	Warm	Constant	short	warm	0.333333	0	1	30.5	34	3.5	32.8125	0	7.5	3.54167	7.5
WCP2	2015-02-26	35	WC	Warm	Constant	short	warm	0.333333	0	1	29.5	33.5	4	31.625	0.5	8.5	4.54167	8
WCP2	2015-02-27	36	WC	Warm	Constant	short	warm	0.333333	0	1	31	33.5	2.5	32.3125	1.5	9.5	5.5	8
WCP2	2015-02-28	37	WC	Warm	Constant	short	warm	0.333333	0	1	30.5	33	2.5	31.875	2.5	10.5	6.58333	8
WCP2	2015-03-01	38	WC	Warm	Constant	short	warm	0.333333	0	1	29.5	32	2.5	30.625	0.5	11.5	7.04167	11
WCP2	2015-03-02	39	WC	Warm	Constant	short	warm	0.333333	0	1	29	32	3	30.5	0	12	8.625	12
WCP2	2015-03-03	40	WC	Warm	Constant	short	warm	0.333333	0	1	25.5	33.5	8	29.9375	6	14	9.75	8
WCP2	2015-03-04	41	WC	Warm	Constant	short	warm	0.333333	0	1	30.5	33	2.5	31.6875	6.5	14.5	10.0417	8
WCP2	2015-03-05	42	WC	Warm	Constant	short	warm	0.333333	0	1	29	31	2	30	7	14	10.0833	7
WCP2	2015-03-06	43	WC	Warm	Constant	short	warm	0.333333	0	1	27	31	4	28.375	6.5	14	9.91667	7.5
WCP2	2015-03-07	44	WC	Warm	Constant	short	warm	0.333333	0	1	24.5	28.5	4	27.125	6.5	14	9.95833	7.5
WCP2	2015-03-08	45	WC	Warm	Constant	short	warm	0.333333	0	1	24.5	31	6.5	27.125	6.5	14	9.95833	7.5
WCP2	2015-03-10	47	WC	Warm	Constant	short	cold2	0.333333	0	1	27	34	7	29.875	-3	3	-0.291667	6
WCP2	2015-03-11	48	WC	Warm	Constant	short	cold2	0.333333	0	1	26	33.5	7.5	29.5	-3	3	-0.125	6
WCP2	2015-03-12	49	WC	Warm	Constant	short	cold2	0.333333	0	1	26.5	32	5.5	29.3125	-3	3	-0.125	6
WCP2	2015-03-13	50	WC	Warm	Constant	short	cold2	0.333333	0	1	26	32.5	6.5	28.4375	-3	3	-0.125	6
WCP2	2015-03-14	51	WC	Warm	Constant	short	cold2	0.333333	0	1	26.5	32.5	6	28.25	-3	3.5	-0.0833333	6.5
WCP2	2015-03-15	52	WC	Warm	Constant	short	cold2	0.333333	0	0	27	33	6	29.625	-3	3.5	-0.0833333	6.5
WCP2	2015-03-16	53	WC	Warm	Constant	short	cold2	0.333333	0	0	26.5	31	4.5	29.1875	-3	3.5	-0.0833333	6.5
WCP2	2015-03-17	54	WC	Warm	Constant	short	cold2	0.333333	0	0	26	29.5	3.5	28.25	-3	3.5	-0.0833333	6.5
WCP2	2015-03-18	55	WC	Warm	Constant	short	cold2	0.333333	0	0	24	29	5	27	-3	3.5	-0.0833333	6.5
WCP2	2015-03-19	56	WC	Warm	Constant	short	cold2	0.333333	0	0	23	28	5	25.1875	-3	3.5	-0.0833333	6.5
WCP2	2015-03-20	57	WC	Warm	Constant	short	cold2	0.333333	0	0	17.5	24.5	7	20.6875	-3	3	-0.125	6
WCP2	2015-03-21	58	WC	Warm	Constant	short	cold2	0.333333	0	0	16.5	30.5	14	24.4375	-3	3.5	-0.0416667	6.5
WCP2	2015-03-22	59	WC	Warm	Constant	short	cold2	0.333333	0	0	24.5	29.5	5	26.75	-3	3.5	-0.0833333	6.5
WCP2	2015-03-23	60	WC	Warm	Constant	short	cold2	0.333333	0	0	21	26	5	24.0625	-3	3.5	-0.0833333	6.5
WCP2	2015-03-24	61	WC	Warm	Constant	short	cold2	0.333333	0	0	20	27	7	23.6875	-3	3.5	-0.0833333	6.5
WCP2	2015-03-25	62	WC	Warm	Constant	short	cold2	0.333333	0	0	17	29	12	21.1875	-3	3.5	-0.0416667	6.5
WCP2	2015-03-26	63	WC	Warm	Constant	short	cold2	0.333333	0	0	12.5	19	6.5	15.9375	-3	3.5	0.0833333	6.5
WCP2	2015-03-27	64	WC	Warm	Constant	short	cold2	0.333333	0	0	10.5	19	8.5	13.4375	-3	3.5	0.0833333	6.5
WCP2	2015-03-28	65	WC	Warm	Constant	short	cold2	0.333333	0	0	0.5	7	6.5	3	-3	3.5	0.0833333	6.5
WCP2	2015-03-29	66	WC	Warm	Constant	short	cold2	0.333333	0	0	-1	3	4	1.5	-3	3.5	0.0833333	6.5
WCP2	2015-03-30	67	WC	Warm	Constant	short	cold2	0.333333	0	0	-1	3	4	1.5	-3	3.5	0.0833333	6.5
WCP2	2015-03-31	68	WC	Warm	Constant	short	cold2	0.333333	0	0	-0.5	3.5	4	1.6875	-3	3.5	0.0833333	6.5
WCP2	2015-04-01	69	WC	Warm	Constant	short	cold2	0.333333	0	0	-0.5	3.5	4	1.8125	-3	3.5	0.166667	6.5
WCP2	2015-04-02	70	WC	Warm	Constant	short	cold2	0.333333	0	0	-0.5	3.5	4	1.75	-3	3.5	0.166667	6.5
WCP2	2015-04-03	71	WC	Warm	Constant	short	cold2	0.333333	0	0	-1	3	4	1.5	-3	3.5	0.166667	6.5
WCP2	2015-04-04	72	WC	Warm	Constant	short	cold2	0.333333	0	0	-1	3	4	1.4375	-3	3.5	0.166667	6.5
WCP2	2015-04-05	73	WC	Warm	Constant	short	cold2	0.333333	0	0	-1	3	4	1.375	-3	3.5	0.166667	6.5
WCP2	2015-04-06	74	WC	Warm	Constant	short	cold2	0.333333	0	0	-1.5	3	4.5	1.1875	-3	3.5	0.166667	6.5
WCP2	2015-04-07	75	WC	Warm	Constant	short	cold2	0.333333	0	0	-1.5	3	4.5	1.0625	-3	3.5	0.25	6.5
WPM1	2015-01-26	4	WP	Warm	Periodic	rising	cold	0.355556	0.00740741	1	18.5	29	10.5	25.25	-1.5	3.5	1.41667	5
WPM1	2015-01-27	5	WP	Warm	Periodic	rising	cold	0.362963	0.00740741	1	22	30	8	27.8125	-3	3.5	0.208333	6.5
WPM1	2015-01-28	6	WP	Warm	Periodic	rising	cold	0.37037	0.00740741	1	25	30	5	27.875	-3	3.5	0.291667	6.5
WPM1	2015-01-29	7	WP	Warm	Periodic	rising	cold	0.377778	0.00740741	1	26.5	35	8.5	29.5625	-3	3.5	0.333333	6.5
WPM1	2015-01-30	8	WP	Warm	Periodic	rising	cold	0.385185	0.00740741	1	18.5	32.5	14	24.9375	-3	3.5	0.333333	6.5
WPM1	2015-01-31	9	WP	Warm	Periodic	rising	cold	0.392593	0.00740741	1	23	32	9	26.8125	-3	3.5	0.333333	6.5
WPM1	2015-02-01	10	WP	Warm	Periodic	rising	cold	0.4	0.00740741	1	22	32.5	10.5	28.3125	-3	3.5	0.333333	6.5
WPM1	2015-02-02	11	WP	Warm	Periodic	rising	cold	0.407407	0.00740741	1	22	30	8	25.6875	-3	3.5	0.333333	6.5
WPM1	2015-02-03	12	WP	Warm	Periodic	rising	cold	0.414815	0.00740741	1	22.5	26	3.5	24.4375	-3	3.5	0.333333	6.5
WPM1	2015-02-04	13	WP	Warm	Periodic	rising	cold	0.422222	0.00740741	1	23	28	5	25.5625	-3	3.5	0.291667	6.5
WPM1	2015-02-05	14	WP	Warm	Periodic	rising	cold	0.42963	0.00740741	1	21	27.5	6.5	24.75	-3	3.5	0.333333	6.5
WPM1	2015-02-06	15	WP	Warm	Periodic	rising	cold	0.437037	0.00740741	1	23	30.5	7.5	27.1875	-3	3.5	0.375	6.5
WPM1	2015-02-07	16	WP	Warm	Periodic	rising	cold	0.444444	0.00740741	1	20.5	23.5	3	21.875	-3	3.5	0.375	6.5
WPM1	2015-02-08	17	WP	Warm	Periodic	rising	cold	0.451852	0.00740741	1	20	26.5	6.5	23.5	-3	3.5	0.375	6.5
WPM1	2015-02-09	18	WP	Warm	Periodic	rising	cold	0.459259	0.00740741	1	22.5	26	3.5	24.1875	-3	3.5	0.416667	6.5
WPM1	2015-02-10	19	WP	Warm	Periodic	rising	cold	0.466667	0.00740741	1	22.5	25.5	3	24.125	-3	3.5	0.416667	6.5
WPM1	2015-02-11	20	WP	Warm	Periodic	rising	cold	0.474074	0.00740741	1	26	32.5	6.5	30.0625	-3	3.5	0.416667	6.5
WPM1	2015-02-12	21	WP	Warm	Periodic	rising	cold	0.481481	0.00740741	1	20.5	27.5	7	24.25	-3	3.5	0.416667	6.5
WPM1	2015-02-13	22	WP	Warm	Periodic	rising	cold	0.488889	0.00740741	1	22.5	27.5	5	24.875	-3	3.5	0.416667	6.5
WPM1	2015-02-14	23	WP	Warm	Periodic	rising	cold	0.496296	0.00740741	1	20	26	6	23.4375	-3	3.5	0.416667	6.5
WPM1	2015-02-15	24	WP	Warm	Periodic	rising	cold	0.503704	0.00740741	1	20.5	27	6.5	23.75	-3	3.5	0.416667	6.5
WPM1	2015-02-16	25	WP	Warm	Periodic	rising	cold	0.511111	0.00740741	1	23.5	30	6.5	27.75	-3	3.5	0.458333	6.5
WPM1	2015-02-17	26	WP	Warm	Periodic	rising	cold	0.518519	0.00740741	1	22	29	7	25.4375	-3	3.5	0.458333	6.5
WPM1	2015-02-18	27	WP	Warm	Periodic	rising	cold	0.525926	0.00740741	1	23	29	6	25.75	-3	3.5	0.458333	6.5
WPM1	2015-02-19	28	WP	Warm	Periodic	rising	cold	0.533333	0.00740741	1	22.5	27.5	5	25.5	-3	3.5	0.458333	6.5
WPM1	2015-02-20	29	WP	Warm	Periodic	rising	cold	0.540741	0.00740741	1	27.5	33.5	6	30.375	-3	4	0.583333	7
WPM1	2015-02-21	30	WP	Warm	Periodic	rising	cold	0.548148	0.00740741	1	19	34	15	26.3125	-2.5	3.5	0.541667	6
WPM1	2015-02-22	31	WP	Warm	Periodic	rising	warm	0.555556	0.00740741	1	18	28.5	10.5	23.875	-3	4.5	1.20833	7.5
WPM1	2015-02-23	32	WP	Warm	Periodic	rising	warm	0.562963	0.00740741	1	22	26	4	23.75	-2	6	2.125	8
WPM1	2015-02-24	33	WP	Warm	Periodic	rising	warm	0.57037	0.00740741	1	20	27.5	7.5	23.5	-1	7	3.08333	8
WPM1	2015-02-25	34	WP	Warm	Periodic	rising	warm	0.577778	0.00740741	1	18.5	29.5	11	24.5625	0	8	4.04167	8
WPM1	2015-02-26	35	WP	Warm	Periodic	rising	warm	0.585185	0.00740741	1	22	27	5	24.25	1	9	5.04167	8
WPM1	2015-02-27	36	WP	Warm	Periodic	rising	warm	0.592593	0.00740741	1	22.5	29.5	7	25.5625	2	10	6.08333	8
WPM1	2015-02-28	37	WP	Warm	Periodic	rising	warm	0.6	0.00740741	1	23.5	29	5.5	25.8125	3	11	7.125	8
WPM1	2015-03-01	38	WP	Warm	Periodic	rising	warm	0.607407	0.00740741	1	17.5	34	16.5	23.3125	2	11.5	7.66667	9.5
WPM1	2015-03-02	39	WP	Warm	Periodic	rising	warm	0.614815	0.00740741	1	33.5	34.5	1	33.875	0	14	9.45833	14
WPM1	2015-03-03	40	WP	Warm	Periodic	rising	warm	0.622222	0.00740741	1	26.5	33.5	7	31.75	6	15	10.4583	9
WPM1	2015-03-04	41	WP	Warm	Periodic	rising	warm	0.62963	0.00740741	1	17	31	14	23	7	14	10.625	7
WPM1	2015-03-05	42	WP	Warm	Periodic	rising	warm	0.637037	0.00740741	1	17.5	28	10.5	22.375	7	14	10.7083	7
WPM1	2015-03-06	43	WP	Warm	Periodic	rising	warm	0.644444	0.00740741	1	19	31	12	24.25	7	14.5	10.7083	7.5
WPM1	2015-03-07	44	WP	Warm	Periodic	rising	warm	0.651852	0.00740741	1	26.5	28	1.5	27.25	7.5	14.5	10.8333	7
WPM1	2015-03-08	45	WP	Warm	Periodic	rising	warm	0.659259	0.00740741	1	20	29	9	24.6875	7	14.5	10.75	7.5
WPM1	2015-03-10	47	WP	Warm	Periodic	decreasing	cold2	0.659259	-0.00740741	1	24.5	30	5.5	26.875	-3	3.5	0.375	6.5
WPM1	2015-03-11	48	WP	Warm	Periodic	decreasing	cold2	0.651852	-0.00740741	1	25	30.5	5.5	27.5625	-3	3.5	0.5	6.5
WPM1	2015-03-12	49	WP	Warm	Periodic	decreasing	cold2	0.644444	-0.00740741	1	23.5	29.5	6	25.9375	-3	3.5	0.458333	6.5
WPM1	2015-03-13	50	WP	Warm	Periodic	decreasing	cold2	0.637037	-0.00740741	1	23.5	30	6.5	26.625	-3	3.5	0.5	6.5
WPM1	2015-03-14	51	WP	Warm	Periodic	decreasing	cold2	0.62963	-0.00740741	1	24.5	27	2.5	26.0625	-3	3.5	0.458333	6.5
WPM1	2015-03-15	52	WP	Warm	Periodic	decreasing	cold2	0.622222	-0.00740741	1	21	28	7	25.125	-3	3.5	0.458333	6.5
WPM1	2015-03-16	53	WP	Warm	Periodic	decreasing	cold2	0.614815	-0.00740741	1	26	34	8	31.3125	-3	3.5	0.458333	6.5
WPM1	2015-03-17	54	WP	Warm	Periodic	decreasing	cold2	0.607407	-0.00740741	1	23.5	33.5	10	29.125	-3	3.5	0.458333	6.5
WPM1	2015-03-18	55	WP	Warm	Periodic	decreasing	cold2	0.6	-0.00740741	1	23.5	32	8.5	28.25	-3	3.5	0.458333	6.5
WPM1	2015-03-19	56	WP	Warm	Periodic	decreasing	cold2	0.592593	-0.00740741	1	21	29	8	25.875	-3	3.5	0.458333	6.5
WPM1	2015-03-20	57	WP	Warm	Periodic	decreasing	cold2	0.585185	-0.00740741	1	24.5	28.5	4	27.0625	-3	3.5	0.458333	6.5
WPM1	2015-03-21	58	WP	Warm	Periodic	decreasing	cold2	0.577778	-0.00740741	1	27	33	6	30.5625	-3	4	0.541667	7
WPM1	2015-03-22	59	WP	Warm	Periodic	decreasing	cold2	0.57037	-0.00740741	1	23.5	30	6.5	26.375	-3	4	0.541667	7
WPM1	2015-03-23	60	WP	Warm	Periodic	decreasing	cold2	0.562963	-0.00740741	1	27	30	3	28.6875	-3	3.5	0.458333	6.5
WPM1	2015-03-24	61	WP	Warm	Periodic	decreasing	cold2	0.555556	-0.00740741	1	22	29.5	7.5	27.125	-3	4	0.5	7
WPM1	2015-03-25	62	WP	Warm	Periodic	decreasing	cold2	0.548148	-0.00740741	1	28	32.5	4.5	30.4375	-3	4	0.583333	7
WPM1	2015-03-26	63	WP	Warm	Periodic	decreasing	cold2	0.540741	-0.00740741	1	23.5	27.5	4	26.0625	-3	4	0.583333	7
WPM1	2015-03-27	64	WP	Warm	Periodic	decreasing	cold2	0.533333	-0.00740741	1	24	30	6	27.375	-3	4	0.625	7
WPM1	2015-03-28	65	WP	Warm	Periodic	decreasing	cold2	0.525926	-0.00740741	1	23	30	7	28.0625	-3	4	0.625	7
WPM1	2015-03-29	66	WP	Warm	Periodic	decreasing	cold2	0.518519	-0.00740741	1	28	33	5	30.6875	-2.5	4	0.791667	6.5
WPM1	2015-03-30	67	WP	Warm	Periodic	decreasing	cold2	0.511111	-0.00740741	1	26.5	31	4.5	28.25	-2.5	4	0.75	6.5
WPM1	2015-03-31	68	WP	Warm	Periodic	decreasing	cold2	0.503704	-0.00740741	1	28	31	3	29.8125	-2.5	4	0.708333	6.5
WPM1	2015-04-01	69	WP	Warm	Periodic	decreasing	cold2	0.496296	-0.00740741	1	24	30	6	27.5625	-2.5	4	0.708333	6.5
WPM1	2015-04-02	70	WP	Warm	Periodic	decreasing	cold2	0.488889	-0.00740741	1	24	27.5	3.5	26.375	-2.5	4	0.708333	6.5
WPM1	2015-04-03	71	WP	Warm	Periodic	decreasing	cold2	0.481481	-0.00740741	1	25.5	28.5	3	27.1875	-2.5	4	0.708333	6.5
WPM1	2015-04-04	72	WP	Warm	Periodic	decreasing	cold2	0.474074	-0.00740741	1	28.5	33.5	5	30.4375	-2.5	4	0.75	6.5
WPM1	2015-04-05	73	WP	Warm	Periodic	decreasing	cold2	0.466667	-0.00740741	1	24.5	27	2.5	25.9375	-2.5	4	0.75	6.5
WPM1	2015-04-06	74	WP	Warm	Periodic	decreasing	cold2	0.459259	-0.00740741	1	26	30.5	4.5	28.75	-2.5	4	0.708333	6.5
WPM1	2015-04-07	75	WP	Warm	Periodic	decreasing	cold2	0.451852	-0.00740741	1	29	34	5	30.9375	-2.5	4.5	0.875	7
WPM2	2015-01-26	4	WP	Warm	Periodic	rising	cold	0.355556	0.00740741	1	27	29	2	28.3125	-2	3	1	5
WPM2	2015-01-27	5	WP	Warm	Periodic	rising	cold	0.362963	0.00740741	1	26.5	29.5	3	27.75	-3	3.5	-0.0416667	6.5
WPM2	2015-01-28	6	WP	Warm	Periodic	rising	cold	0.37037	0.00740741	1	25	29	4	26.4375	-3	3.5	-0.0416667	6.5
WPM2	2015-01-29	7	WP	Warm	Periodic	rising	cold	0.377778	0.00740741	1	26.5	32.5	6	28.3125	-3	3.5	-0.0416667	6.5
WPM2	2015-01-30	8	WP	Warm	Periodic	rising	cold	0.385185	0.00740741	1	25	31	6	28.1875	-3	3.5	0.0416667	6.5
WPM2	2015-01-31	9	WP	Warm	Periodic	rising	cold	0.392593	0.00740741	1	27	30.5	3.5	29	-3	3.5	0.0833333	6.5
WPM2	2015-02-01	10	WP	Warm	Periodic	rising	cold	0.4	0.00740741	1	27.5	32	4.5	29.625	-3	3.5	0.0833333	6.5
WPM2	2015-02-02	11	WP	Warm	Periodic	rising	cold	0.407407	0.00740741	1	28	30.5	2.5	29.1875	-3	3.5	0.0833333	6.5
WPM2	2015-02-03	12	WP	Warm	Periodic	rising	cold	0.414815	0.00740741	1	28.5	30	1.5	29.25	-3	3.5	0.0833333	6.5
WPM2	2015-02-04	13	WP	Warm	Periodic	rising	cold	0.422222	0.00740741	1	27	32	5	29.625	-3	3.5	0.0833333	6.5
WPM2	2015-02-05	14	WP	Warm	Periodic	rising	cold	0.42963	0.00740741	1	27.5	30.5	3	28.5	-3	3.5	0.0833333	6.5
WPM2	2015-02-06	15	WP	Warm	Periodic	rising	cold	0.437037	0.00740741	1	28.5	31.5	3	30.125	-3	3.5	0.0833333	6.5
WPM2	2015-02-07	16	WP	Warm	Periodic	rising	cold	0.444444	0.00740741	1	30.5	32.5	2	31.3125	-3	3.5	0.0833333	6.5
WPM2	2015-02-08	17	WP	Warm	Periodic	rising	cold	0.451852	0.00740741	1	30.5	33	2.5	31.875	-3	3.5	0.0833333	6.5
WPM2	2015-02-09	18	WP	Warm	Periodic	rising	cold	0.459259	0.00740741	1	30	32.5	2.5	31	-3	3.5	0.0833333	6.5
WPM2	2015-02-10	19	WP	Warm	Periodic	rising	cold	0.466667	0.00740741	1	28.5	31.5	3	30.375	-3	3.5	0.0833333	6.5
WPM2	2015-02-11	20	WP	Warm	Periodic	rising	cold	0.474074	0.00740741	1	27.5	32	4.5	29.8125	-3	3.5	0.0833333	6.5
WPM2	2015-02-12	21	WP	Warm	Periodic	rising	cold	0.481481	0.00740741	1	26.5	29	2.5	27.75	-3	3.5	0.0833333	6.5
WPM2	2015-02-13	22	WP	Warm	Periodic	rising	cold	0.488889	0.00740741	1	24.5	30.5	6	27.375	-3	3.5	0.125	6.5
WPM2	2015-02-14	23	WP	Warm	Periodic	rising	cold	0.496296	0.00740741	1	25.5	28	2.5	26.625	-3	3.5	0.125	6.5
WPM2	2015-02-15	24	WP	Warm	Periodic	rising	cold	0.503704	0.00740741	1	25.5	30	4.5	27.8125	-3	3.5	0.125	6.5
WPM2	2015-02-16	25	WP	Warm	Periodic	rising	cold	0.511111	0.00740741	1	26	31.5	5.5	28.0625	-3	3.5	0.125	6.5
WPM2	2015-02-17	26	WP	Warm	Periodic	rising	cold	0.518519	0.00740741	1	27	29.5	2.5	28	-3	3.5	0.166667	6.5
WPM2	2015-02-18	27	WP	Warm	Periodic	rising	cold	0.525926	0.00740741	1	26	28.5	2.5	27.5	-3	3.5	0.125	6.5
WPM2	2015-02-19	28	WP	Warm	Periodic	rising	cold	0.533333	0.00740741	1	26.5	30	3.5	27.875	-3	3.5	0.208333	6.5
WPM2	2015-02-20	29	WP	Warm	Periodic	rising	cold	0.540741	0.00740741	1	26.5	30.5	4	27.5625	-3	3.5	0.208333	6.5
WPM2	2015-02-21	30	WP	Warm	Periodic	rising	cold	0.548148	0.00740741	1	25.5	32	6.5	28.125	-3	3.5	0.166667	6.5
WPM2	2015-02-22	31	WP	Warm	Periodic	rising	warm	0.555556	0.00740741	1	25.5	28.5	3	27.1875	-3	4.5	0.875	7.5
WPM2	2015-02-23	32	WP	Warm	Periodic	rising	warm	0.562963	0.00740741	1	25	32	7	27.25	-2	5.5	1.75	7.5
WPM2	2015-02-24	33	WP	Warm	Periodic	rising	warm	0.57037	0.00740741	1	24.5	28	3.5	26.3571	-1	6.5	2.79167	7.5
WPM2	2015-02-25	34	WP	Warm	Periodic	rising	warm	0.577778	0.00740741	1	25	28	3	27	0	7.5	3.75	7.5
WPM2	2015-02-26	35	WP	Warm	Periodic	rising	warm	0.585185	0.00740741	1	26	28.5	2.5	26.9286	0.5	8.5	4.75	8
WPM2	2015-02-27	36	WP	Warm	Periodic	rising	warm	0.592593	0.00740741	1	25.5	27.5	2	26.2857	1.5	9.5	5.75	8
WPM2	2015-02-28	37	WP	Warm	Periodic	rising	warm	0.6	0.00740741	1	24.5	31.5	7	27.5	2.5	11	6.875	8.5
WPM2	2015-03-01	38	WP	Warm	Periodic	rising	warm	0.607407	0.00740741	1	27	29	2	27.7857	1.5	12	7.58333	10.5
WPM2	2015-03-02	39	WP	Warm	Periodic	rising	warm	0.614815	0.00740741	1	24.5	27.5	3	26.6429	-0.5	13	8.875	13.5
WPM2	2015-03-03	40	WP	Warm	Periodic	rising	warm	0.622222	0.00740741	1	25	29	4	27.1429	6	14.5	10.125	8.5
WPM2	2015-03-04	41	WP	Warm	Periodic	rising	warm	0.62963	0.00740741	1	26	31.5	5.5	28.4286	7	14.5	10.5417	7.5
WPM2	2015-03-05	42	WP	Warm	Periodic	rising	warm	0.637037	0.00740741	1	26.5	31	4.5	28.4286	7	15.5	10.625	8.5
WPM2	2015-03-06	43	WP	Warm	Periodic	rising	warm	0.644444	0.00740741	1	26	30	4	28.7143	7	15	10.6667	8
WPM2	2015-03-07	44	WP	Warm	Periodic	rising	warm	0.651852	0.00740741	1	26	29.5	3.5	27.6429	7	15	10.5833	8
WPM2	2015-03-08	45	WP	Warm	Periodic	rising	warm	0.659259	0.00740741	1	25.5	29	3.5	27.1429	7	14	10.4583	7
WPM2	2015-03-10	47	WP	Warm	Periodic	decreasing	cold2	0.659259	-0.00740741	1	27	31.5	4.5	28.5	-3	3	0	6
WPM2	2015-03-11	48	WP	Warm	Periodic	decreasing	cold2	0.651852	-0.00740741	1	26.5	30	3.5	28.1429	-3	3.5	0.125	6.5
WPM2	2015-03-12	49	WP	Warm	Periodic	decreasing	cold2	0.644444	-0.00740741	1	27	29	2	27.9286	-3.5	3.5	0.0833333	7
WPM2	2015-03-13	50	WP	Warm	Periodic	decreasing	cold2	0.637037	-0.00740741	1	27.5	31	3.5	29.6429	-3.5	3.5	0.0833333	7
WPM2	2015-03-14	51	WP	Warm	Periodic	decreasing	cold2	0.62963	-0.00740741	1	27	31.5	4.5	28.9286	-3	3.5	0.125	6.5
WPM2	2015-03-15	52	WP	Warm	Periodic	decreasing	cold2	0.622222	-0.00740741	1	26.5	29	2.5	27.8571	-3	3.5	0.291667	6.5
WPM2	2015-03-16	53	WP	Warm	Periodic	decreasing	cold2	0.614815	-0.00740741	1	26	29	3	27.6429	-3	3.5	0.291667	6.5
WPM2	2015-03-17	54	WP	Warm	Periodic	decreasing	cold2	0.607407	-0.00740741	1	26.5	30.5	4	28.5	-3	3.5	0.291667	6.5
WPM2	2015-03-18	55	WP	Warm	Periodic	decreasing	cold2	0.6	-0.00740741	1	27	31	4	29.4286	-3	3.5	0.291667	6.5
WPM2	2015-03-19	56	WP	Warm	Periodic	decreasing	cold2	0.592593	-0.00740741	1	26	31.5	5.5	29.7143	-3	3.5	0.291667	6.5
WPM2	2015-03-20	57	WP	Warm	Periodic	decreasing	cold2	0.585185	-0.00740741	1	26.5	30	3.5	28.6429	-3	3.5	0.291667	6.5
WPM2	2015-03-21	58	WP	Warm	Periodic	decreasing	cold2	0.577778	-0.00740741	1	27	30.5	3.5	28.7857	-3	3.5	0.291667	6.5
WPM2	2015-03-22	59	WP	Warm	Periodic	decreasing	cold2	0.57037	-0.00740741	1	27	31.5	4.5	28.7143	-3	3.5	0.291667	6.5
WPM2	2015-03-23	60	WP	Warm	Periodic	decreasing	cold2	0.562963	-0.00740741	1	28.5	32	3.5	30.7857	-3	3.5	0.291667	6.5
WPM2	2015-03-24	61	WP	Warm	Periodic	decreasing	cold2	0.555556	-0.00740741	1	30	32.5	2.5	31.2143	-3	3.5	0.291667	6.5
WPM2	2015-03-25	62	WP	Warm	Periodic	decreasing	cold2	0.548148	-0.00740741	1	29	31	2	30	-3	4	0.333333	7
WPM2	2015-03-26	63	WP	Warm	Periodic	decreasing	cold2	0.540741	-0.00740741	1	26.5	30.5	4	28.2857	-3	4	0.333333	7
WPM2	2015-03-27	64	WP	Warm	Periodic	decreasing	cold2	0.533333	-0.00740741	1	25.5	28.5	3	27.1429	-3	4	0.333333	7
WPM2	2015-03-28	65	WP	Warm	Periodic	decreasing	cold2	0.525926	-0.00740741	1	25.5	27.5	2	26.7857	-3	4	0.458333	7
WPM2	2015-03-29	66	WP	Warm	Periodic	decreasing	cold2	0.518519	-0.00740741	1	25	27	2	26.1429	-3	4	0.541667	7
WPM2	2015-03-30	67	WP	Warm	Periodic	decreasing	cold2	0.511111	-0.00740741	1	22.5	26	3.5	24.2857	-3	4	0.541667	7
WPM2	2015-03-31	68	WP	Warm	Periodic	decreasing	cold2	0.503704	-0.00740741	1	23.5	27	3.5	24.4375	-3	4	0.5	7
WPM2	2015-04-01	69	WP	Warm	Periodic	decreasing	cold2	0.496296	-0.00740741	1	22.5	26	3.5	24.4375	-3	4	0.5	7
WPM2	2015-04-02	70	WP	Warm	Periodic	decreasing	cold2	0.488889	-0.00740741	1	23.5	30	6.5	27	-3	4	0.541667	7
WPM2	2015-04-03	71	WP	Warm	Periodic	decreasing	cold2	0.481481	-0.00740741	0	26.5	31	4.5	28.9375	-3	4	0.5	7
WPM2	2015-04-04	72	WP	Warm	Periodic	decreasing	cold2	0.474074	-0.00740741	0	27	33.5	6.5	31.5	-3	4	0.541667	7
WPM2	2015-04-05	73	WP	Warm	Periodic	decreasing	cold2	0.466667	-0.00740741	0	23.5	32.5	9	28.9375	-3	4	0.5	7
WPM2	2015-04-06	74	WP	Warm	Periodic	decreasing	cold2	0.459259	-0.00740741	0	13	23.5	10.5	18.25	-3	4	0.541667	7
WPM2	2015-04-07	75	WP	Warm	Periodic	decreasing	cold2	0.451852	-0.00740741	0	2	10.5	8.5	4.3125	-3	3.5	0.333333	6.5
WPP1	2015-01-26	4	WP	Warm	Periodic	rising	cold	0.355556	0.00740741	1	24.5	29.5	5	27.125	-2	3	1.125	5
WPP1	2015-01-27	5	WP	Warm	Periodic	rising	cold	0.362963	0.00740741	1	25.5	26.5	1	25.875	-3	3.5	0.166667	6.5
WPP1	2015-01-28	6	WP	Warm	Periodic	rising	cold	0.37037	0.00740741	1	25.5	28	2.5	26.5	-3	3.5	0.166667	6.5
WPP1	2015-01-29	7	WP	Warm	Periodic	rising	cold	0.377778	0.00740741	1	26.5	31.5	5	29	-3	3.5	0.166667	6.5
WPP1	2015-01-30	8	WP	Warm	Periodic	rising	cold	0.385185	0.00740741	1	26	31.5	5.5	27.8125	-3	3.5	0.166667	6.5
WPP1	2015-01-31	9	WP	Warm	Periodic	rising	cold	0.392593	0.00740741	1	26.5	29	2.5	27.875	-3	3.5	0.166667	6.5
WPP1	2015-02-01	10	WP	Warm	Periodic	rising	cold	0.4	0.00740741	1	26	31	5	28.3125	-3	3.5	0.166667	6.5
WPP1	2015-02-02	11	WP	Warm	Periodic	rising	cold	0.407407	0.00740741	1	27	29	2	27.875	-3	3.5	0.166667	6.5
WPP1	2015-02-03	12	WP	Warm	Periodic	rising	cold	0.414815	0.00740741	1	26.5	29.5	3	27.4375	-3	3.5	0.166667	6.5
WPP1	2015-02-04	13	WP	Warm	Periodic	rising	cold	0.422222	0.00740741	1	26.5	28	1.5	27.4375	-3	3.5	0.166667	6.5
WPP1	2015-02-05	14	WP	Warm	Periodic	rising	cold	0.42963	0.00740741	1	26.5	28.5	2	27.6875	-3	3.5	0.166667	6.5
WPP1	2015-02-06	15	WP	Warm	Periodic	rising	cold	0.437037	0.00740741	1	25.5	27.5	2	26.8125	-3	3.5	0.166667	6.5
WPP1	2015-02-07	16	WP	Warm	Periodic	rising	cold	0.444444	0.00740741	1	27	28.5	1.5	27.875	-3	3.5	0.166667	6.5
WPP1	2015-02-08	17	WP	Warm	Periodic	rising	cold	0.451852	0.00740741	1	26.5	29	2.5	27.5	-3	3.5	0.166667	6.5
WPP1	2015-02-09	18	WP	Warm	Periodic	rising	cold	0.459259	0.00740741	1	26	29.5	3.5	27.375	-3	3.5	0.208333	6.5
WPP1	2015-02-10	19	WP	Warm	Periodic	rising	cold	0.466667	0.00740741	1	26	28.5	2.5	27.0625	-3	3.5	0.208333	6.5
WPP1	2015-02-11	20	WP	Warm	Periodic	rising	cold	0.474074	0.00740741	1	25.5	29.5	4	27.375	-3	3.5	0.208333	6.5
WPP1	2015-02-12	21	WP	Warm	Periodic	rising	cold	0.481481	0.00740741	1	26.5	28.5	2	27.375	-3	3.5	0.208333	6.5
WPP1	2015-02-13	22	WP	Warm	Periodic	rising	cold	0.488889	0.00740741	1	26	28	2	26.8125	-3	3.5	0.208333	6.5
WPP1	2015-02-14	23	WP	Warm	Periodic	rising	cold	0.496296	0.00740741	1	26	28	2	27.25	-3	3.5	0.25	6.5
WPP1	2015-02-15	24	WP	Warm	Periodic	rising	cold	0.503704	0.00740741	1	25.5	28.5	3	26.875	-3	3.5	0.25	6.5
WPP1	2015-02-16	25	WP	Warm	Periodic	rising	cold	0.511111	0.00740741	1	25.5	27	1.5	26.375	-3	3.5	0.25	6.5
WPP1	2015-02-17	26	WP	Warm	Periodic	rising	cold	0.518519	0.00740741	1	25	27.5	2.5	26	-3	3.5	0.291667	6.5
WPP1	2015-02-18	27	WP	Warm	Periodic	rising	cold	0.525926	0.00740741	1	25.5	28	2.5	26.6875	-3	3.5	0.25	6.5
WPP1	2015-02-19	28	WP	Warm	Periodic	rising	cold	0.533333	0.00740741	1	25.5	27.5	2	26.375	-3	3.5	0.291667	6.5
WPP1	2015-02-20	29	WP	Warm	Periodic	rising	cold	0.540741	0.00740741	1	25	31	6	27.9375	-3	3.5	0.25	6.5
WPP1	2015-02-21	30	WP	Warm	Periodic	rising	cold	0.548148	0.00740741	1	25.5	28	2.5	26.75	-3	3.5	0.25	6.5
WPP1	2015-02-22	31	WP	Warm	Periodic	rising	warm	0.555556	0.00740741	1	26	28	2	27.3125	-3	4.5	0.958333	7.5
WPP1	2015-02-23	32	WP	Warm	Periodic	rising	warm	0.562963	0.00740741	1	25	28.5	3.5	26.875	-2	5.5	1.875	7.5
WPP1	2015-02-24	33	WP	Warm	Periodic	rising	warm	0.57037	0.00740741	1	25.5	28.5	3	27.5625	-1	6.5	2.875	7.5
WPP1	2015-02-25	34	WP	Warm	Periodic	rising	warm	0.577778	0.00740741	1	26	31	5	27.75	0	7.5	3.79167	7.5
WPP1	2015-02-26	35	WP	Warm	Periodic	rising	warm	0.585185	0.00740741	1	27	30.5	3.5	29.0625	1	8.5	4.79167	7.5
WPP1	2015-02-27	36	WP	Warm	Periodic	rising	warm	0.592593	0.00740741	1	28	31	3	29.8125	2	9.5	5.83333	7.5
WPP1	2015-02-28	37	WP	Warm	Periodic	rising	warm	0.6	0.00740741	1	28	31	3	29.125	3	10.5	6.83333	7.5
WPP1	2015-03-01	38	WP	Warm	Periodic	rising	warm	0.607407	0.00740741	1	27.5	32.5	5	29.875	1	12	7.58333	11
WPP1	2015-03-02	39	WP	Warm	Periodic	rising	warm	0.614815	0.00740741	1	29	32	3	30.6875	0	12.5	8.95833	12.5
WPP1	2015-03-03	40	WP	Warm	Periodic	rising	warm	0.622222	0.00740741	1	29	33	4	30.75	6	14	10.0417	8
WPP1	2015-03-04	41	WP	Warm	Periodic	rising	warm	0.62963	0.00740741	1	30	32.5	2.5	30.9375	7	14	10.4167	7
WPP1	2015-03-05	42	WP	Warm	Periodic	rising	warm	0.637037	0.00740741	1	29	32.5	3.5	31.0625	7	14	10.4167	7
WPP1	2015-03-06	43	WP	Warm	Periodic	rising	warm	0.644444	0.00740741	1	31	32.5	1.5	31.75	7	14.5	10.4583	7.5
WPP1	2015-03-07	44	WP	Warm	Periodic	rising	warm	0.651852	0.00740741	1	30.5	32	1.5	31.3125	7	14	10.4583	7
WPP1	2015-03-08	45	WP	Warm	Periodic	rising	warm	0.659259	0.00740741	1	30.5	32.5	2	31.1875	7	14.5	10.5417	7.5
WPP1	2015-03-10	47	WP	Warm	Periodic	decreasing	cold2	0.659259	-0.00740741	1	26	31	5	29.3125	-3	3	0	6
WPP1	2015-03-11	48	WP	Warm	Periodic	decreasing	cold2	0.651852	-0.00740741	1	26	29.5	3.5	27.6875	-3	3.5	0.166667	6.5
WPP1	2015-03-12	49	WP	Warm	Periodic	decreasing	cold2	0.644444	-0.00740741	1	26	29.5	3.5	27.875	-3	3.5	0.125	6.5
WPP1	2015-03-13	50	WP	Warm	Periodic	decreasing	cold2	0.637037	-0.00740741	1	26.5	28.5	2	27.875	-3	3.5	0.125	6.5
WPP1	2015-03-14	51	WP	Warm	Periodic	decreasing	cold2	0.62963	-0.00740741	1	26	29	3	27.3125	-3	3.5	0.208333	6.5
WPP1	2015-03-15	52	WP	Warm	Periodic	decreasing	cold2	0.622222	-0.00740741	1	27	29	2	27.6875	-3	3.5	0.25	6.5
WPP1	2015-03-16	53	WP	Warm	Periodic	decreasing	cold2	0.614815	-0.00740741	1	27.5	29.5	2	28.8125	-3	3.5	0.25	6.5
WPP1	2015-03-17	54	WP	Warm	Periodic	decreasing	cold2	0.607407	-0.00740741	1	28.5	32	3.5	29.5625	-3	3.5	0.25	6.5
WPP1	2015-03-18	55	WP	Warm	Periodic	decreasing	cold2	0.6	-0.00740741	1	26	31	5	29.125	-3	3.5	0.25	6.5
WPP1	2015-03-19	56	WP	Warm	Periodic	decreasing	cold2	0.592593	-0.00740741	1	24.5	29.5	5	27.375	-3	3.5	0.25	6.5
WPP1	2015-03-20	57	WP	Warm	Periodic	decreasing	cold2	0.585185	-0.00740741	1	26.5	31.5	5	30.3125	-3	3.5	0.25	6.5
WPP1	2015-03-21	58	WP	Warm	Periodic	decreasing	cold2	0.577778	-0.00740741	1	30	32	2	30.5	-3	3.5	0.25	6.5
WPP1	2015-03-22	59	WP	Warm	Periodic	decreasing	cold2	0.57037	-0.00740741	1	31.5	32	0.5	31.75	-3	3.5	0.25	6.5
WPP1	2015-03-23	60	WP	Warm	Periodic	decreasing	cold2	0.562963	-0.00740741	1	30	31.5	1.5	30.75	-3	3.5	0.25	6.5
WPP1	2015-03-24	61	WP	Warm	Periodic	decreasing	cold2	0.555556	-0.00740741	1	30	32	2	31	-3	3.5	0.25	6.5
WPP1	2015-03-25	62	WP	Warm	Periodic	decreasing	cold2	0.548148	-0.00740741	1	29.5	31	1.5	30.1875	-3	3.5	0.333333	6.5
WPP1	2015-03-26	63	WP	Warm	Periodic	decreasing	cold2	0.540741	-0.00740741	1	29	30.5	1.5	29.9375	-3	4	0.416667	7
WPP1	2015-03-27	64	WP	Warm	Periodic	decreasing	cold2	0.533333	-0.00740741	1	30	31.5	1.5	30.5625	-3	4	0.458333	7
WPP1	2015-03-28	65	WP	Warm	Periodic	decreasing	cold2	0.525926	-0.00740741	1	31	32	1	31.3125	-3	4	0.5	7
WPP1	2015-03-29	66	WP	Warm	Periodic	decreasing	cold2	0.518519	-0.00740741	1	30	32	2	31	-3	4	0.5	7
WPP1	2015-03-30	67	WP	Warm	Periodic	decreasing	cold2	0.511111	-0.00740741	1	31	33	2	31.75	-3	4	0.5	7
WPP1	2015-03-31	68	WP	Warm	Periodic	decreasing	cold2	0.503704	-0.00740741	1	32.5	33	0.5	32.75	-3	4	0.5	7
WPP1	2015-04-01	69	WP	Warm	Periodic	decreasing	cold2	0.496296	-0.00740741	1	32.5	33	0.5	32.75	-3	4	0.5	7
WPP1	2015-04-02	70	WP	Warm	Periodic	decreasing	cold2	0.488889	-0.00740741	1	32	33	1	32.5	-3	4	0.458333	7
WPP1	2015-04-03	71	WP	Warm	Periodic	decreasing	cold2	0.481481	-0.00740741	1	32	33	1	32.625	-3	4	0.458333	7
WPP1	2015-04-04	72	WP	Warm	Periodic	decreasing	cold2	0.474074	-0.00740741	1	32	33	1	32.5625	-3	3.5	0.416667	6.5
WPP1	2015-04-05	73	WP	Warm	Periodic	decreasing	cold2	0.466667	-0.00740741	1	32	33	1	32.4375	-3	3.5	0.416667	6.5
WPP1	2015-04-06	74	WP	Warm	Periodic	decreasing	cold2	0.459259	-0.00740741	1	31.5	32.5	1	32.0625	-3	4	0.458333	7
WPP1	2015-04-07	75	WP	Warm	Periodic	decreasing	cold2	0.451852	-0.00740741	1	31.5	33.5	2	32.3125	-3	4	0.583333	7
WPP2	2015-01-26	4	WP	Warm	Periodic	rising	cold	0.355556	0.00740741	1	18	31.5	13.5	22.8125	-2	3	1.04167	5
WPP2	2015-01-27	5	WP	Warm	Periodic	rising	cold	0.362963	0.00740741	1	19	30.5	11.5	25.125	-3.5	3.5	0	7
WPP2	2015-01-28	6	WP	Warm	Periodic	rising	cold	0.37037	0.00740741	1	21.5	28	6.5	24.25	-3.5	3.5	-0.0416667	7
WPP2	2015-01-29	7	WP	Warm	Periodic	rising	cold	0.377778	0.00740741	1	23	31.5	8.5	27.1875	-3	3.5	0.0416667	6.5
WPP2	2015-01-30	8	WP	Warm	Periodic	rising	cold	0.385185	0.00740741	1	20	27.5	7.5	23.9375	-3	3.5	0.0833333	6.5
WPP2	2015-01-31	9	WP	Warm	Periodic	rising	cold	0.392593	0.00740741	1	20.5	27.5	7	24.125	-3	3.5	0.0833333	6.5
WPP2	2015-02-01	10	WP	Warm	Periodic	rising	cold	0.4	0.00740741	1	19	28	9	24.6875	-3	3.5	0.0833333	6.5
WPP2	2015-02-02	11	WP	Warm	Periodic	rising	cold	0.407407	0.00740741	1	21.5	28	6.5	25.3125	-3	3.5	0.0833333	6.5
WPP2	2015-02-03	12	WP	Warm	Periodic	rising	cold	0.414815	0.00740741	1	21.5	29	7.5	25.1875	-3	3.5	0.0833333	6.5
WPP2	2015-02-04	13	WP	Warm	Periodic	rising	cold	0.422222	0.00740741	1	20	28	8	23.375	-3	3.5	0.0833333	6.5
WPP2	2015-02-05	14	WP	Warm	Periodic	rising	cold	0.42963	0.00740741	1	21	28	7	24.6875	-3	3.5	0.0833333	6.5
WPP2	2015-02-06	15	WP	Warm	Periodic	rising	cold	0.437037	0.00740741	1	22	31	9	26.3125	-3	3.5	0.0833333	6.5
WPP2	2015-02-07	16	WP	Warm	Periodic	rising	cold	0.444444	0.00740741	1	21	31	10	25.25	-3	3.5	0.0833333	6.5
WPP2	2015-02-08	17	WP	Warm	Periodic	rising	cold	0.451852	0.00740741	1	21	29	8	24.5	-3	3.5	0.0833333	6.5
WPP2	2015-02-09	18	WP	Warm	Periodic	rising	cold	0.459259	0.00740741	1	21.5	28.5	7	25.25	-3	3.5	0.0833333	6.5
WPP2	2015-02-10	19	WP	Warm	Periodic	rising	cold	0.466667	0.00740741	1	22	31	9	26.75	-3	3.5	0.0833333	6.5
WPP2	2015-02-11	20	WP	Warm	Periodic	rising	cold	0.474074	0.00740741	1	21	30.5	9.5	25.75	-3	3.5	0.166667	6.5
WPP2	2015-02-12	21	WP	Warm	Periodic	rising	cold	0.481481	0.00740741	1	20	28	8	24.25	-3	3.5	0.125	6.5
WPP2	2015-02-13	22	WP	Warm	Periodic	rising	cold	0.488889	0.00740741	1	21	28.5	7.5	25.5	-3	3.5	0.125	6.5
WPP2	2015-02-14	23	WP	Warm	Periodic	rising	cold	0.496296	0.00740741	1	17.5	26.5	9	22.1875	-3	3.5	0.125	6.5
WPP2	2015-02-15	24	WP	Warm	Periodic	rising	cold	0.503704	0.00740741	1	22	29.5	7.5	25.4375	-3	3.5	0.166667	6.5
WPP2	2015-02-16	25	WP	Warm	Periodic	rising	cold	0.511111	0.00740741	1	20.5	28	7.5	25.5	-3	3.5	0.166667	6.5
WPP2	2015-02-17	26	WP	Warm	Periodic	rising	cold	0.518519	0.00740741	1	17.5	27.5	10	23	-3	3.5	0.166667	6.5
WPP2	2015-02-18	27	WP	Warm	Periodic	rising	cold	0.525926	0.00740741	1	20	29.5	9.5	24.625	-3	3.5	0.25	6.5
WPP2	2015-02-19	28	WP	Warm	Periodic	rising	cold	0.533333	0.00740741	1	20	30	10	25.5	-3	3.5	0.25	6.5
WPP2	2015-02-20	29	WP	Warm	Periodic	rising	cold	0.540741	0.00740741	1	22	32.5	10.5	26.4375	-3	3.5	0.333333	6.5
WPP2	2015-02-21	30	WP	Warm	Periodic	rising	cold	0.548148	0.00740741	1	19	30.5	11.5	24.9375	-3	3.5	0.375	6.5
WPP2	2015-02-22	31	WP	Warm	Periodic	rising	warm	0.555556	0.00740741	1	21.5	31	9.5	25.125	-3	4.5	1.04167	7.5
WPP2	2015-02-23	32	WP	Warm	Periodic	rising	warm	0.562963	0.00740741	1	19	28	9	24	-2	6	2	8
WPP2	2015-02-24	33	WP	Warm	Periodic	rising	warm	0.57037	0.00740741	1	18.5	30	11.5	22.6875	-1	6.5	2.91667	7.5
WPP2	2015-02-25	34	WP	Warm	Periodic	rising	warm	0.577778	0.00740741	1	19.5	30.5	11	25.125	0	7.5	3.91667	7.5
WPP2	2015-02-26	35	WP	Warm	Periodic	rising	warm	0.585185	0.00740741	1	25.5	32.5	7	29.5625	1	8.5	4.91667	7.5
WPP2	2015-02-27	36	WP	Warm	Periodic	rising	warm	0.592593	0.00740741	1	20	29	9	24.5625	2	10	6.04167	8
WPP2	2015-02-28	37	WP	Warm	Periodic	rising	warm	0.6	0.00740741	1	17.5	27	9.5	23.0625	3	10.5	6.95833	7.5
WPP2	2015-03-01	38	WP	Warm	Periodic	rising	warm	0.607407	0.00740741	1	17	33	16	24.625	1.5	11.5	7.58333	10
WPP2	2015-03-02	39	WP	Warm	Periodic	rising	warm	0.614815	0.00740741	1	28	30.5	2.5	29.5	0	13.5	9.29167	13.5
WPP2	2015-03-03	40	WP	Warm	Periodic	rising	warm	0.622222	0.00740741	1	25.5	28.5	3	26.75	6	14.5	10.2083	8.5
WPP2	2015-03-04	41	WP	Warm	Periodic	rising	warm	0.62963	0.00740741	1	17	27.5	10.5	21.9375	7	14	10.5	7
WPP2	2015-03-05	42	WP	Warm	Periodic	rising	warm	0.637037	0.00740741	1	17	29.5	12.5	22	7	14	10.5	7
WPP2	2015-03-06	43	WP	Warm	Periodic	rising	warm	0.644444	0.00740741	1	17	31.5	14.5	23.5625	7	14	10.5	7
WPP2	2015-03-07	44	WP	Warm	Periodic	rising	warm	0.651852	0.00740741	1	18.5	27.5	9	22.875	7	14.5	10.5417	7.5
WPP2	2015-03-08	45	WP	Warm	Periodic	rising	warm	0.659259	0.00740741	1	16.5	30	13.5	22.6875	7	14.5	10.5417	7.5
WPP2	2015-03-10	47	WP	Warm	Periodic	decreasing	cold2	0.659259	-0.00740741	1	22.5	30.5	8	26	-3	3.5	0.25	6.5
WPP2	2015-03-11	48	WP	Warm	Periodic	decreasing	cold2	0.651852	-0.00740741	1	19.5	32	12.5	27	-3	3.5	0.375	6.5
WPP2	2015-03-12	49	WP	Warm	Periodic	decreasing	cold2	0.644444	-0.00740741	1	21	29.5	8.5	25.3125	-3	3.5	0.333333	6.5
WPP2	2015-03-13	50	WP	Warm	Periodic	decreasing	cold2	0.637037	-0.00740741	1	20	30.5	10.5	25.6875	-3	3.5	0.333333	6.5
WPP2	2015-03-14	51	WP	Warm	Periodic	decreasing	cold2	0.62963	-0.00740741	1	24	30	6	26.375	-3	3.5	0.333333	6.5
WPP2	2015-03-15	52	WP	Warm	Periodic	decreasing	cold2	0.622222	-0.00740741	1	23.5	29.5	6	26.3125	-3	3.5	0.333333	6.5
WPP2	2015-03-16	53	WP	Warm	Periodic	decreasing	cold2	0.614815	-0.00740741	1	23.5	31	7.5	27.3125	-3	3.5	0.333333	6.5
WPP2	2015-03-17	54	WP	Warm	Periodic	decreasing	cold2	0.607407	-0.00740741	1	21.5	31	9.5	26.1875	-3	3.5	0.333333	6.5
WPP2	2015-03-18	55	WP	Warm	Periodic	decreasing	cold2	0.6	-0.00740741	1	22.5	30.5	8	26.4375	-3	3.5	0.333333	6.5
WPP2	2015-03-19	56	WP	Warm	Periodic	decreasing	cold2	0.592593	-0.00740741	1	20	30.5	10.5	25.875	-3	3.5	0.333333	6.5
WPP2	2015-03-20	57	WP	Warm	Periodic	decreasing	cold2	0.585185	-0.00740741	1	27.5	31.5	4	29.25	-3	3.5	0.375	6.5
WPP2	2015-03-21	58	WP	Warm	Periodic	decreasing	cold2	0.577778	-0.00740741	1	25	30	5	27.9375	-3	3.5	0.375	6.5
WPP2	2015-03-22	59	WP	Warm	Periodic	decreasing	cold2	0.57037	-0.00740741	1	24.5	32	7.5	28.875	-3	3.5	0.333333	6.5
WPP2	2015-03-23	60	WP	Warm	Periodic	decreasing	cold2	0.562963	-0.00740741	1	23	29	6	26.4375	-3	3.5	0.375	6.5
WPP2	2015-03-24	61	WP	Warm	Periodic	decreasing	cold2	0.555556	-0.00740741	1	26.5	33.5	7	30.75	-3	3.5	0.333333	6.5
WPP2	2015-03-25	62	WP	Warm	Periodic	decreasing	cold2	0.548148	-0.00740741	1	25	31	6	28.8125	-3	4	0.416667	7
WPP2	2015-03-26	63	WP	Warm	Periodic	decreasing	cold2	0.540741	-0.00740741	1	29.5	31.5	2	30.6875	-3	4	0.541667	7
WPP2	2015-03-27	64	WP	Warm	Periodic	decreasing	cold2	0.533333	-0.00740741	1	28.5	31	2.5	30.1875	-3	4	0.541667	7
WPP2	2015-03-28	65	WP	Warm	Periodic	decreasing	cold2	0.525926	-0.00740741	1	30.5	33	2.5	31.9375	-3	4	0.541667	7
WPP2	2015-03-29	66	WP	Warm	Periodic	decreasing	cold2	0.518519	-0.00740741	1	28	33.5	5.5	31.6875	-3	4	0.583333	7
WPP2	2015-03-30	67	WP	Warm	Periodic	decreasing	cold2	0.511111	-0.00740741	1	29.5	32.5	3	31.5	-3	4	0.583333	7
WPP2	2015-03-31	68	WP	Warm	Periodic	decreasing	cold2	0.503704	-0.00740741	1	30.5	33	2.5	31.75	-3	4	0.583333	7
WPP2	2015-04-01	69	WP	Warm	Periodic	decreasing	cold2	0.496296	-0.00740741	1	31	34	3	32.75	-3	4	0.625	7
WPP2	2015-04-02	70	WP	Warm	Periodic	decreasing	cold2	0.488889	-0.00740741	1	28	33	5	30.9375	-3	4	0.666667	7
WPP2	2015-04-03	71	WP	Warm	Periodic	decreasing	cold2	0.481481	-0.00740741	1	26.5	33	6.5	29.875	-3	4	0.666667	7
WPP2	2015-04-04	72	WP	Warm	Periodic	decreasing	cold2	0.474074	-0.00740741	1	25.5	33	7.5	28.4375	-3	4	0.666667	7
WPP2	2015-04-05	73	WP	Warm	Periodic	decreasing	cold2	0.466667	-0.00740741	1	28	33	5	30	-3	4	0.666667	7
WPP2	2015-04-06	74	WP	Warm	Periodic	decreasing	cold2	0.459259	-0.00740741	1	24.5	29	4.5	27.5	-3	4	0.666667	7
WPP2	2015-04-07	75	WP	Warm	Periodic	decreasing	cold2	0.451852	-0.00740741	1	27.5	32	4.5	30.125	-3	4	0.666667	7
WRM1	2015-01-26	4	WR	Warm	Rising	rising	cold	0.338889	0.00185185	1	26	33.5	7.5	30.25	-2	3	1.125	5
WRM1	2015-01-27	5	WR	Warm	Rising	rising	cold	0.340741	0.00185185	1	22.5	30.5	8	25.0625	-3	3	0	6
WRM1	2015-01-28	6	WR	Warm	Rising	rising	cold	0.342593	0.00185185	1	22	27	5	24.1875	-3	3	0.0833333	6
WRM1	2015-01-29	7	WR	Warm	Rising	rising	cold	0.344444	0.00185185	1	24.5	27.5	3	25.25	-3	3	0.0833333	6
WRM1	2015-01-30	8	WR	Warm	Rising	rising	cold	0.346296	0.00185185	1	23	30.5	7.5	26.5625	-3	3	0.0833333	6
WRM1	2015-01-31	9	WR	Warm	Rising	rising	cold	0.348148	0.00185185	1	25	29	4	26.375	-3	3	0.0833333	6
WRM1	2015-02-01	10	WR	Warm	Rising	rising	cold	0.35	0.00185185	1	20	30	10	24.5	-3	3	0.0833333	6
WRM1	2015-02-02	11	WR	Warm	Rising	rising	cold	0.351852	0.00185185	1	22	30	8	24.5625	-3	3	0.0833333	6
WRM1	2015-02-03	12	WR	Warm	Rising	rising	cold	0.353704	0.00185185	1	25	28.5	3.5	26.5	-3	3	0.0833333	6
WRM1	2015-02-04	13	WR	Warm	Rising	rising	cold	0.355556	0.00185185	1	19	29	10	24.0625	-3	3	0.0833333	6
WRM1	2015-02-05	14	WR	Warm	Rising	rising	cold	0.357407	0.00185185	1	24.5	30	5.5	26.875	-3	3	0.0833333	6
WRM1	2015-02-06	15	WR	Warm	Rising	rising	cold	0.359259	0.00185185	1	24.5	30	5.5	27.1875	-3	3	0.125	6
WRM1	2015-02-07	16	WR	Warm	Rising	rising	cold	0.361111	0.00185185	1	24	32	8	28.3125	-3	3	0.0833333	6
WRM1	2015-02-08	17	WR	Warm	Rising	rising	cold	0.362963	0.00185185	1	24.5	32	7.5	26.8125	-3	3	0.0833333	6
WRM1	2015-02-09	18	WR	Warm	Rising	rising	cold	0.364815	0.00185185	1	27	33	6	30.1875	-3	3	0.125	6
WRM1	2015-02-10	19	WR	Warm	Rising	rising	cold	0.366667	0.00185185	1	24.5	33	8.5	28.75	-3	3	0.125	6
WRM1	2015-02-11	20	WR	Warm	Rising	rising	cold	0.368519	0.00185185	1	24	32.5	8.5	29.8125	-3	3	0.125	6
WRM1	2015-02-12	21	WR	Warm	Rising	rising	cold	0.37037	0.00185185	1	22.5	30	7.5	26.0625	-3	3	0.125	6
WRM1	2015-02-13	22	WR	Warm	Rising	rising	cold	0.372222	0.00185185	1	25	31	6	27.5625	-3	3	0.125	6
WRM1	2015-02-14	23	WR	Warm	Rising	rising	cold	0.374074	0.00185185	1	24.5	32.5	8	28.625	-3	3	0.166667	6
WRM1	2015-02-15	24	WR	Warm	Rising	rising	cold	0.375926	0.00185185	1	24	30	6	26.75	-3	3	0.0833333	6
WRM1	2015-02-16	25	WR	Warm	Rising	rising	cold	0.377778	0.00185185	1	22	28	6	25.5625	-3	3	0.166667	6
WRM1	2015-02-17	26	WR	Warm	Rising	rising	cold	0.37963	0.00185185	1	20.5	29	8.5	23.25	-3	3	0.0833333	6
WRM1	2015-02-18	27	WR	Warm	Rising	rising	cold	0.381481	0.00185185	1	24	28.5	4.5	25.6875	-3	3	0.166667	6
WRM1	2015-02-19	28	WR	Warm	Rising	rising	cold	0.383333	0.00185185	1	25	32.5	7.5	29.75	-3	3	0.166667	6
WRM1	2015-02-20	29	WR	Warm	Rising	rising	cold	0.385185	0.00185185	1	27.5	34	6.5	32.1875	-3	3	0.166667	6
WRM1	2015-02-21	30	WR	Warm	Rising	rising	cold	0.387037	0.00185185	1	24.5	33	8.5	29.25	-3	3	0.0833333	6
WRM1	2015-02-22	31	WR	Warm	Rising	rising	warm	0.388889	0.00185185	1	22	31.5	9.5	28.0625	-3	4.5	0.875	7.5
WRM1	2015-02-23	32	WR	Warm	Rising	rising	warm	0.390741	0.00185185	1	21.5	28.5	7	26.375	-2	5.5	1.70833	7.5
WRM1	2015-02-24	33	WR	Warm	Rising	rising	warm	0.392593	0.00185185	1	20.5	24.5	4	23.1875	-1	6	2.66667	7
WRM1	2015-02-25	34	WR	Warm	Rising	rising	warm	0.394444	0.00185185	1	17.5	22	4.5	20.125	0	7	3.625	7
WRM1	2015-02-26	35	WR	Warm	Rising	rising	warm	0.396296	0.00185185	1	18.5	22.5	4	20.875	1	8	4.58333	7
WRM1	2015-02-27	36	WR	Warm	Rising	rising	warm	0.398148	0.00185185	1	20.5	23.5	3	22.3125	2	9	5.58333	7
WRM1	2015-02-28	37	WR	Warm	Rising	rising	warm	0.4	0.00185185	1	19.5	23	3.5	21.125	3	10	6.54167	7
WRM1	2015-03-01	38	WR	Warm	Rising	rising	warm	0.401852	0.00185185	1	21	30.5	9.5	24.0625	1.5	11	7.25	9.5
WRM1	2015-03-02	39	WR	Warm	Rising	rising	warm	0.403704	0.00185185	1	27	30	3	28.375	0	12.5	8.70833	12.5
WRM1	2015-03-03	40	WR	Warm	Rising	rising	warm	0.405556	0.00185185	1	26	30.5	4.5	27.9375	6	13.5	9.75	7.5
WRM1	2015-03-04	41	WR	Warm	Rising	rising	warm	0.407407	0.00185185	1	25	30.5	5.5	27.5625	7	13.5	10.1667	6.5
WRM1	2015-03-05	42	WR	Warm	Rising	rising	warm	0.409259	0.00185185	1	26	32.5	6.5	28.625	7	13.5	10.1667	6.5
WRM1	2015-03-06	43	WR	Warm	Rising	rising	warm	0.411111	0.00185185	1	28.5	32	3.5	29.75	7	14	10.2083	7
WRM1	2015-03-07	44	WR	Warm	Rising	rising	warm	0.412963	0.00185185	1	27.5	33	5.5	29.625	7	13.5	10.1667	6.5
WRM1	2015-03-08	45	WR	Warm	Rising	rising	warm	0.414815	0.00185185	1	30	32.5	2.5	31.5	7	14	10.25	7
WRM1	2015-03-10	47	WR	Warm	Rising	rising	cold2	0.418519	0.00185185	1	27.5	32.5	5	30.4375	-3	3	-0.125	6
WRM1	2015-03-11	48	WR	Warm	Rising	rising	cold2	0.42037	0.00185185	1	28	31.5	3.5	29.5	-3	3	0.0833333	6
WRM1	2015-03-12	49	WR	Warm	Rising	rising	cold2	0.422222	0.00185185	1	27	30	3	28.375	-3	3	0.0833333	6
WRM1	2015-03-13	50	WR	Warm	Rising	rising	cold2	0.424074	0.00185185	1	27.5	31	3.5	28.5	-3	3	0.0833333	6
WRM1	2015-03-14	51	WR	Warm	Rising	rising	cold2	0.425926	0.00185185	1	27	29.5	2.5	28.3125	-3	3	0.125	6
WRM1	2015-03-15	52	WR	Warm	Rising	rising	cold2	0.427778	0.00185185	1	26	29.5	3.5	27.75	-3	3	0.125	6
WRM1	2015-03-16	53	WR	Warm	Rising	rising	cold2	0.42963	0.00185185	1	26.5	32	5.5	28.875	-3	3	0.125	6
WRM1	2015-03-17	54	WR	Warm	Rising	rising	cold2	0.431481	0.00185185	1	26	31	5	28.5	-3	3	0.166667	6
WRM1	2015-03-18	55	WR	Warm	Rising	rising	cold2	0.433333	0.00185185	1	27.5	31	3.5	29.5625	-3	3	0.166667	6
WRM1	2015-03-19	56	WR	Warm	Rising	rising	cold2	0.435185	0.00185185	1	26	30	4	27.875	-3	3	0.166667	6
WRM1	2015-03-20	57	WR	Warm	Rising	rising	cold2	0.437037	0.00185185	1	26.5	31	4.5	28.8125	-3	3	0.208333	6
WRM1	2015-03-21	58	WR	Warm	Rising	rising	cold2	0.438889	0.00185185	1	26.5	30.5	4	28.0625	-3	3	0.166667	6
WRM1	2015-03-22	59	WR	Warm	Rising	rising	cold2	0.440741	0.00185185	1	26.5	30.5	4	28.1875	-3	3	0.208333	6
WRM1	2015-03-23	60	WR	Warm	Rising	rising	cold2	0.442593	0.00185185	1	27	32	5	28.5	-3	3	0.208333	6
WRM1	2015-03-24	61	WR	Warm	Rising	rising	cold2	0.444444	0.00185185	1	27	31.5	4.5	29.4375	-3	3	0.208333	6
WRM1	2015-03-25	62	WR	Warm	Rising	rising	cold2	0.446296	0.00185185	1	27	30.5	3.5	28.0625	-3	3.5	0.208333	6.5
WRM1	2015-03-26	63	WR	Warm	Rising	rising	cold2	0.448148	0.00185185	1	27	31	4	29	-3	3.5	0.25	6.5
WRM1	2015-03-27	64	WR	Warm	Rising	rising	cold2	0.45	0.00185185	1	26.5	30	3.5	27.75	-3	3.5	0.25	6.5
WRM1	2015-03-28	65	WR	Warm	Rising	rising	cold2	0.451852	0.00185185	1	27.5	31.5	4	28.875	-3	3.5	0.25	6.5
WRM1	2015-03-29	66	WR	Warm	Rising	rising	cold2	0.453704	0.00185185	1	26.5	30	3.5	28.375	-3	3.5	0.25	6.5
WRM1	2015-03-30	67	WR	Warm	Rising	rising	cold2	0.455556	0.00185185	1	27	29.5	2.5	27.9375	-3	3.5	0.25	6.5
WRM1	2015-03-31	68	WR	Warm	Rising	rising	cold2	0.457407	0.00185185	1	26	29.5	3.5	27.625	-3	3.5	0.25	6.5
WRM1	2015-04-01	69	WR	Warm	Rising	rising	cold2	0.459259	0.00185185	1	27	31.5	4.5	28.5625	-3	3.5	0.25	6.5
WRM1	2015-04-02	70	WR	Warm	Rising	rising	cold2	0.461111	0.00185185	1	27.5	29.5	2	28.8125	-3	3.5	0.25	6.5
WRM1	2015-04-03	71	WR	Warm	Rising	rising	cold2	0.462963	0.00185185	1	25.5	30.5	5	28	-2.5	3.5	0.291667	6
WRM1	2015-04-04	72	WR	Warm	Rising	rising	cold2	0.464815	0.00185185	1	26.5	28.5	2	27.625	-3	3	0.208333	6
WRM1	2015-04-05	73	WR	Warm	Rising	rising	cold2	0.466667	0.00185185	1	25.5	27	1.5	26.25	-3	3.5	0.25	6.5
WRM1	2015-04-06	74	WR	Warm	Rising	rising	cold2	0.468519	0.00185185	1	25.5	31	5.5	28.0625	-3	3.5	0.291667	6.5
WRM1	2015-04-07	75	WR	Warm	Rising	rising	cold2	0.47037	0.00185185	1	27	29.5	2.5	28.125	-2.5	3.5	0.375	6
WRM2	2015-01-26	4	WR	Warm	Rising	rising	cold	0.338889	0.00185185	1	19.5	23.5	4	21.1875	-1.5	3.5	1.33333	5
WRM2	2015-01-27	5	WR	Warm	Rising	rising	cold	0.340741	0.00185185	1	24.5	33.5	9	28.0625	-3	3	0.125	6
WRM2	2015-01-28	6	WR	Warm	Rising	rising	cold	0.342593	0.00185185	1	27.5	30	2.5	28.8125	-3	3	0.125	6
WRM2	2015-01-29	7	WR	Warm	Rising	rising	cold	0.344444	0.00185185	1	26	32.5	6.5	28.875	-3	3	0.125	6
WRM2	2015-01-30	8	WR	Warm	Rising	rising	cold	0.346296	0.00185185	1	25.5	29.5	4	27.3125	-3	3	0.125	6
WRM2	2015-01-31	9	WR	Warm	Rising	rising	cold	0.348148	0.00185185	1	26	33	7	28.25	-3	3	0.125	6
WRM2	2015-02-01	10	WR	Warm	Rising	rising	cold	0.35	0.00185185	1	24.5	28	3.5	25.75	-3	3	0.125	6
WRM2	2015-02-02	11	WR	Warm	Rising	rising	cold	0.351852	0.00185185	1	24	33	9	27.25	-3	3	0.125	6
WRM2	2015-02-03	12	WR	Warm	Rising	rising	cold	0.353704	0.00185185	1	30	34	4	32.5	-3	3	0.125	6
WRM2	2015-02-04	13	WR	Warm	Rising	rising	cold	0.355556	0.00185185	1	31.5	33.5	2	32.5625	-3	3	0.125	6
WRM2	2015-02-05	14	WR	Warm	Rising	rising	cold	0.357407	0.00185185	1	31.5	34	2.5	32.9375	-3	3	0.125	6
WRM2	2015-02-06	15	WR	Warm	Rising	rising	cold	0.359259	0.00185185	1	32	34	2	32.875	-3	3	0.125	6
WRM2	2015-02-07	16	WR	Warm	Rising	rising	cold	0.361111	0.00185185	1	25	33.5	8.5	31	-3	3	0.125	6
WRM2	2015-02-08	17	WR	Warm	Rising	rising	cold	0.362963	0.00185185	1	32	34	2	32.9375	-3	3	0.125	6
WRM2	2015-02-09	18	WR	Warm	Rising	rising	cold	0.364815	0.00185185	1	28.5	33.5	5	31.25	-3	3	0.125	6
WRM2	2015-02-10	19	WR	Warm	Rising	rising	cold	0.366667	0.00185185	1	27	34	7	31.75	-3	3	0.125	6
WRM2	2015-02-11	20	WR	Warm	Rising	rising	cold	0.368519	0.00185185	1	29	33	4	31.0625	-3	3	0.125	6
WRM2	2015-02-12	21	WR	Warm	Rising	rising	cold	0.37037	0.00185185	1	23	33.5	10.5	30.0625	-3	3	0.125	6
WRM2	2015-02-13	22	WR	Warm	Rising	rising	cold	0.372222	0.00185185	1	28	32.5	4.5	30.6875	-3	3	0.125	6
WRM2	2015-02-14	23	WR	Warm	Rising	rising	cold	0.374074	0.00185185	1	24.5	34	9.5	30.625	-3	3	0.125	6
WRM2	2015-02-15	24	WR	Warm	Rising	rising	cold	0.375926	0.00185185	1	23	30.5	7.5	26.25	-3	3	0.125	6
WRM2	2015-02-16	25	WR	Warm	Rising	rising	cold	0.377778	0.00185185	1	18.5	27.5	9	22.0625	-3	3	0.125	6
WRM2	2015-02-17	26	WR	Warm	Rising	rising	cold	0.37963	0.00185185	1	18.5	23	4.5	20.625	-3	3	0.125	6
WRM2	2015-02-18	27	WR	Warm	Rising	rising	cold	0.381481	0.00185185	1	20.5	32.5	12	27.75	-3	3	0.125	6
WRM2	2015-02-19	28	WR	Warm	Rising	rising	cold	0.383333	0.00185185	1	22	27.5	5.5	24.75	-3	3	0.125	6
WRM2	2015-02-20	29	WR	Warm	Rising	rising	cold	0.385185	0.00185185	1	18	30	12	24.4375	-3	3	0.125	6
WRM2	2015-02-21	30	WR	Warm	Rising	rising	cold	0.387037	0.00185185	1	26	31.5	5.5	28.5625	-3	3	0.125	6
WRM2	2015-02-22	31	WR	Warm	Rising	rising	warm	0.388889	0.00185185	1	24	32	8	29.375	-3	4	0.833333	7
WRM2	2015-02-23	32	WR	Warm	Rising	rising	warm	0.390741	0.00185185	1	27.5	31.5	4	29.4375	-2	5.5	1.75	7.5
WRM2	2015-02-24	33	WR	Warm	Rising	rising	warm	0.392593	0.00185185	1	27.5	30.5	3	29.375	-1	6.5	2.75	7.5
WRM2	2015-02-25	34	WR	Warm	Rising	rising	warm	0.394444	0.00185185	1	26.5	29.5	3	28.5625	0	7.5	3.66667	7.5
WRM2	2015-02-26	35	WR	Warm	Rising	rising	warm	0.396296	0.00185185	1	28	31	3	29.25	1	8	4.54167	7
WRM2	2015-02-27	36	WR	Warm	Rising	rising	warm	0.398148	0.00185185	1	23	27.5	4.5	25.5625	2	9	5.5	7
WRM2	2015-02-28	37	WR	Warm	Rising	rising	warm	0.4	0.00185185	1	23.5	28	4.5	24.9375	3	10.5	6.66667	7.5
WRM2	2015-03-01	38	WR	Warm	Rising	rising	warm	0.401852	0.00185185	1	21.5	32.5	11	27.125	2	11	7.29167	9
WRM2	2015-03-02	39	WR	Warm	Rising	rising	warm	0.403704	0.00185185	1	28	33	5	30.8125	0	12	8.70833	12
WRM2	2015-03-03	40	WR	Warm	Rising	rising	warm	0.405556	0.00185185	1	28	31	3	29.3125	6	13.5	9.75	7.5
WRM2	2015-03-04	41	WR	Warm	Rising	rising	warm	0.407407	0.00185185	1	29	31.5	2.5	30.3125	7	13.5	10.2083	6.5
WRM2	2015-03-05	42	WR	Warm	Rising	rising	warm	0.409259	0.00185185	1	26.5	31.5	5	28.6875	7	13.5	10.1667	6.5
WRM2	2015-03-06	43	WR	Warm	Rising	rising	warm	0.411111	0.00185185	1	26	29.5	3.5	27.8125	7	13.5	10.2083	6.5
WRM2	2015-03-07	44	WR	Warm	Rising	rising	warm	0.412963	0.00185185	1	27	29.5	2.5	28.1875	7	13.5	10.2083	6.5
WRM2	2015-03-08	45	WR	Warm	Rising	rising	warm	0.414815	0.00185185	1	29	33.5	4.5	30.875	7	13.5	10.2083	6.5
WRM2	2015-03-10	47	WR	Warm	Rising	rising	cold2	0.418519	0.00185185	1	28.5	31.5	3	29.5625	-3	3	0	6
WRM2	2015-03-11	48	WR	Warm	Rising	rising	cold2	0.42037	0.00185185	1	29	32	3	30.0625	-3	3	0.0416667	6
WRM2	2015-03-12	49	WR	Warm	Rising	rising	cold2	0.422222	0.00185185	1	28	30.5	2.5	29.3125	-3	3	0.0416667	6
WRM2	2015-03-13	50	WR	Warm	Rising	rising	cold2	0.424074	0.00185185	1	28.5	32	3.5	30.125	-3	3	0.0416667	6
WRM2	2015-03-14	51	WR	Warm	Rising	rising	cold2	0.425926	0.00185185	1	27.5	31	3.5	29.4375	-3	3	0.0833333	6
WRM2	2015-03-15	52	WR	Warm	Rising	rising	cold2	0.427778	0.00185185	1	29	31	2	29.9375	-3	3	0.125	6
WRM2	2015-03-16	53	WR	Warm	Rising	rising	cold2	0.42963	0.00185185	1	28.5	31.5	3	29.875	-3	3	0.0833333	6
WRM2	2015-03-17	54	WR	Warm	Rising	rising	cold2	0.431481	0.00185185	1	28.5	30.5	2	29.125	-3	3	0.125	6
WRM2	2015-03-18	55	WR	Warm	Rising	rising	cold2	0.433333	0.00185185	1	28	30.5	2.5	28.9375	-3	3	0.125	6
WRM2	2015-03-19	56	WR	Warm	Rising	rising	cold2	0.435185	0.00185185	1	28	29.5	1.5	28.5625	-3	3	0.125	6
WRM2	2015-03-20	57	WR	Warm	Rising	rising	cold2	0.437037	0.00185185	1	28.5	30	1.5	29	-3	3	0.125	6
WRM2	2015-03-21	58	WR	Warm	Rising	rising	cold2	0.438889	0.00185185	1	27	29.5	2.5	28.5	-3	3	0.125	6
WRM2	2015-03-22	59	WR	Warm	Rising	rising	cold2	0.440741	0.00185185	1	28	30	2	29	-3	3	0.166667	6
WRM2	2015-03-23	60	WR	Warm	Rising	rising	cold2	0.442593	0.00185185	1	27	30	3	28.375	-3	3	0.125	6
WRM2	2015-03-24	61	WR	Warm	Rising	rising	cold2	0.444444	0.00185185	1	26	28.5	2.5	27.375	-3	3	0.125	6
WRM2	2015-03-25	62	WR	Warm	Rising	rising	cold2	0.446296	0.00185185	1	26	30	4	28.375	-3	3.5	0.166667	6.5
WRM2	2015-03-26	63	WR	Warm	Rising	rising	cold2	0.448148	0.00185185	1	25.5	30.5	5	28.3125	-3	3.5	0.166667	6.5
WRM2	2015-03-27	64	WR	Warm	Rising	rising	cold2	0.45	0.00185185	1	27.5	28.5	1	27.875	-3	3.5	0.208333	6.5
WRM2	2015-03-28	65	WR	Warm	Rising	rising	cold2	0.451852	0.00185185	1	26.5	29.5	3	27.375	-3	3.5	0.25	6.5
WRM2	2015-03-29	66	WR	Warm	Rising	rising	cold2	0.453704	0.00185185	1	25.5	29	3.5	26.8125	-3	3.5	0.333333	6.5
WRM2	2015-03-30	67	WR	Warm	Rising	rising	cold2	0.455556	0.00185185	1	25	27	2	26	-3	3.5	0.333333	6.5
WRM2	2015-03-31	68	WR	Warm	Rising	rising	cold2	0.457407	0.00185185	1	24	27.5	3.5	25.8125	-3	3.5	0.25	6.5
WRM2	2015-04-01	69	WR	Warm	Rising	rising	cold2	0.459259	0.00185185	1	25	28.5	3.5	26.6875	-3	3.5	0.291667	6.5
WRM2	2015-04-02	70	WR	Warm	Rising	rising	cold2	0.461111	0.00185185	1	26	28	2	27.125	-3	3.5	0.25	6.5
WRM2	2015-04-03	71	WR	Warm	Rising	rising	cold2	0.462963	0.00185185	1	23	29	6	26	-3	3.5	0.291667	6.5
WRM2	2015-04-04	72	WR	Warm	Rising	rising	cold2	0.464815	0.00185185	1	22	24.5	2.5	23.8125	-3	3.5	0.333333	6.5
WRM2	2015-04-05	73	WR	Warm	Rising	rising	cold2	0.466667	0.00185185	1	21.5	28	6.5	24.25	-3	3.5	0.291667	6.5
WRM2	2015-04-06	74	WR	Warm	Rising	rising	cold2	0.468519	0.00185185	1	22	31	9	28.0625	-3	3.5	0.291667	6.5
WRM2	2015-04-07	75	WR	Warm	Rising	rising	cold2	0.47037	0.00185185	1	29.5	33	3.5	31	-2.5	3.5	0.416667	6
WRM3	2015-01-26	4	WR	Warm	Rising	rising	cold	0.338889	0.00185185	1	20.5	32.5	12	28.4375	-2	3.5	1.25	5.5
WRM3	2015-01-27	5	WR	Warm	Rising	rising	cold	0.340741	0.00185185	1	28	33	5	30.8125	-3	3	0	6
WRM3	2015-01-28	6	WR	Warm	Rising	rising	cold	0.342593	0.00185185	1	27	32	5	29.9375	-3	3	-0.0416667	6
WRM3	2015-01-29	7	WR	Warm	Rising	rising	cold	0.344444	0.00185185	1	26.5	33	6.5	29.6875	-3	3	0	6
WRM3	2015-01-30	8	WR	Warm	Rising	rising	cold	0.346296	0.00185185	1	29	32.5	3.5	31.25	-3	3	-0.0416667	6
WRM3	2015-01-31	9	WR	Warm	Rising	rising	cold	0.348148	0.00185185	1	23.5	33.5	10	29.625	-3	3	0	6
WRM3	2015-02-01	10	WR	Warm	Rising	rising	cold	0.35	0.00185185	1	28	33.5	5.5	30.875	-3	3	-0.0416667	6
WRM3	2015-02-02	11	WR	Warm	Rising	rising	cold	0.351852	0.00185185	1	29.5	34	4.5	31.6875	-3	3	0	6
WRM3	2015-02-03	12	WR	Warm	Rising	rising	cold	0.353704	0.00185185	1	26.5	33.5	7	30.125	-3	3	0	6
WRM3	2015-02-04	13	WR	Warm	Rising	rising	cold	0.355556	0.00185185	1	27.5	34	6.5	31.0625	-3	3	0	6
WRM3	2015-02-05	14	WR	Warm	Rising	rising	cold	0.357407	0.00185185	1	30.5	33	2.5	31.6875	-3	3	0	6
WRM3	2015-02-06	15	WR	Warm	Rising	rising	cold	0.359259	0.00185185	1	27.5	33.5	6	30.75	-3	3	0	6
WRM3	2015-02-07	16	WR	Warm	Rising	rising	cold	0.361111	0.00185185	1	28.5	33.5	5	31.25	-3	3	0	6
WRM3	2015-02-08	17	WR	Warm	Rising	rising	cold	0.362963	0.00185185	1	26	32.5	6.5	30.25	-3	3	0	6
WRM3	2015-02-09	18	WR	Warm	Rising	rising	cold	0.364815	0.00185185	1	26.5	33.5	7	30.375	-3	3	0	6
WRM3	2015-02-10	19	WR	Warm	Rising	rising	cold	0.366667	0.00185185	1	23.5	32.5	9	29.625	-3	3	0	6
WRM3	2015-02-11	20	WR	Warm	Rising	rising	cold	0.368519	0.00185185	1	27	31.5	4.5	29.6875	-3	3	0	6
WRM3	2015-02-12	21	WR	Warm	Rising	rising	cold	0.37037	0.00185185	1	22	30	8	27.125	-3	3	0	6
WRM3	2015-02-13	22	WR	Warm	Rising	rising	cold	0.372222	0.00185185	1	26.5	31.5	5	28.6875	-3	3	0	6
WRM3	2015-02-14	23	WR	Warm	Rising	rising	cold	0.374074	0.00185185	1	21	27.5	6.5	24.75	-3	3	0	6
WRM3	2015-02-15	24	WR	Warm	Rising	rising	cold	0.375926	0.00185185	1	21	25	4	22.6875	-3	3	0	6
WRM3	2015-02-16	25	WR	Warm	Rising	rising	cold	0.377778	0.00185185	1	20	25.5	5.5	22.5	-3	3	0	6
WRM3	2015-02-17	26	WR	Warm	Rising	rising	cold	0.37963	0.00185185	1	20.5	24	3.5	22.3125	-3	3	0	6
WRM3	2015-02-18	27	WR	Warm	Rising	rising	cold	0.381481	0.00185185	1	20	24.5	4.5	22.375	-3	3	0	6
WRM3	2015-02-19	28	WR	Warm	Rising	rising	cold	0.383333	0.00185185	1	20	25	5	21.75	-3	3	0	6
WRM3	2015-02-20	29	WR	Warm	Rising	rising	cold	0.385185	0.00185185	1	21	29	8	23.875	-3	3.5	0.0416667	6.5
WRM3	2015-02-21	30	WR	Warm	Rising	rising	cold	0.387037	0.00185185	1	19	28.5	9.5	22.25	-3	3.5	0.0416667	6.5
WRM3	2015-02-22	31	WR	Warm	Rising	rising	warm	0.388889	0.00185185	1	19	29	10	23.0625	-3	4.5	0.75	7.5
WRM3	2015-02-23	32	WR	Warm	Rising	rising	warm	0.390741	0.00185185	1	20	24.5	4.5	21.6875	-2	5.5	1.66667	7.5
WRM3	2015-02-24	33	WR	Warm	Rising	rising	warm	0.392593	0.00185185	1	17.5	31	13.5	23.6875	-1	6.5	2.66667	7.5
WRM3	2015-02-25	34	WR	Warm	Rising	rising	warm	0.394444	0.00185185	1	19	22.5	3.5	21.0625	0	7.5	3.58333	7.5
WRM3	2015-02-26	35	WR	Warm	Rising	rising	warm	0.396296	0.00185185	1	20.5	32.5	12	23.4375	1	8.5	4.66667	7.5
WRM3	2015-02-27	36	WR	Warm	Rising	rising	warm	0.398148	0.00185185	1	18.5	27	8.5	22.9375	2	9.5	5.66667	7.5
WRM3	2015-02-28	37	WR	Warm	Rising	rising	warm	0.4	0.00185185	1	17	31.5	14.5	23.5	3	10.5	6.70833	7.5
WRM3	2015-03-01	38	WR	Warm	Rising	rising	warm	0.401852	0.00185185	1	19.5	27	7.5	23.5	1.5	11.5	7.29167	10
WRM3	2015-03-02	39	WR	Warm	Rising	rising	warm	0.403704	0.00185185	1	17.5	30.5	13	22.75	0	12.5	8.79167	12.5
WRM3	2015-03-03	40	WR	Warm	Rising	rising	warm	0.405556	0.00185185	1	17.5	25	7.5	22.375	6	13.5	9.83333	7.5
WRM3	2015-03-04	41	WR	Warm	Rising	rising	warm	0.407407	0.00185185	1	15.5	28	12.5	22.1875	7	14	10.25	7
WRM3	2015-03-05	42	WR	Warm	Rising	rising	warm	0.409259	0.00185185	1	17	26	9	21.875	7	14	10.25	7
WRM3	2015-03-06	43	WR	Warm	Rising	rising	warm	0.411111	0.00185185	1	16	25.5	9.5	21.375	7	14	10.25	7
WRM3	2015-03-07	44	WR	Warm	Rising	rising	warm	0.412963	0.00185185	1	16.5	24.5	8	20.625	7	14	10.25	7
WRM3	2015-03-08	45	WR	Warm	Rising	rising	warm	0.414815	0.00185185	1	17	33	16	25.5625	7	14	10.25	7
WRM3	2015-03-10	47	WR	Warm	Rising	rising	cold2	0.418519	0.00185185	1	23	32.5	9.5	27.625	-3	3	-0.166667	6
WRM3	2015-03-11	48	WR	Warm	Rising	rising	cold2	0.42037	0.00185185	1	21.5	32.5	11	27.4375	-3	3	-0.0416667	6
WRM3	2015-03-12	49	WR	Warm	Rising	rising	cold2	0.422222	0.00185185	1	22	30	8	26.875	-3	3	-0.0416667	6
WRM3	2015-03-13	50	WR	Warm	Rising	rising	cold2	0.424074	0.00185185	1	19	30	11	24.875	-3	3	-0.0416667	6
WRM3	2015-03-14	51	WR	Warm	Rising	rising	cold2	0.425926	0.00185185	1	20.5	31	10.5	22.6875	-3	3	0	6
WRM3	2015-03-15	52	WR	Warm	Rising	rising	cold2	0.427778	0.00185185	1	21	32	11	24.5625	-3	3	-0.0416667	6
WRM3	2015-03-16	53	WR	Warm	Rising	rising	cold2	0.42963	0.00185185	1	23	30	7	25.5625	-3	3	0.0416667	6
WRM3	2015-03-17	54	WR	Warm	Rising	rising	cold2	0.431481	0.00185185	1	24.5	31	6.5	26.8125	-3	3	0.0833333	6
WRM3	2015-03-18	55	WR	Warm	Rising	rising	cold2	0.433333	0.00185185	1	24.5	33	8.5	30.3125	-3	3.5	0.125	6.5
WRM3	2015-03-19	56	WR	Warm	Rising	rising	cold2	0.435185	0.00185185	1	24.5	32	7.5	29.5625	-3	3.5	0.125	6.5
WRM3	2015-03-20	57	WR	Warm	Rising	rising	cold2	0.437037	0.00185185	1	24.5	32	7.5	29.5625	-3	3.5	0.125	6.5
WRM3	2015-03-21	58	WR	Warm	Rising	rising	cold2	0.438889	0.00185185	1	25.5	32	6.5	28.875	-3	3.5	0.125	6.5
WRM3	2015-03-22	59	WR	Warm	Rising	rising	cold2	0.440741	0.00185185	1	25.5	32.5	7	29.0625	-3	3.5	0.125	6.5
WRM3	2015-03-23	60	WR	Warm	Rising	rising	cold2	0.442593	0.00185185	1	24	32	8	28.875	-3	3.5	0.125	6.5
WRM3	2015-03-24	61	WR	Warm	Rising	rising	cold2	0.444444	0.00185185	1	28	33	5	30.4375	-3	3.5	0.125	6.5
WRM3	2015-03-25	62	WR	Warm	Rising	rising	cold2	0.446296	0.00185185	1	27	30	3	28.25	-3	3.5	0.125	6.5
WRM3	2015-03-26	63	WR	Warm	Rising	rising	cold2	0.448148	0.00185185	1	26.5	32.5	6	29.9375	-3	3.5	0.166667	6.5
WRM3	2015-03-27	64	WR	Warm	Rising	rising	cold2	0.45	0.00185185	1	25	30	5	28.125	-3	3.5	0.166667	6.5
WRM3	2015-03-28	65	WR	Warm	Rising	rising	cold2	0.451852	0.00185185	1	25.5	29	3.5	27.3125	-3	3.5	0.25	6.5
WRM3	2015-03-29	66	WR	Warm	Rising	rising	cold2	0.453704	0.00185185	1	22.5	30.5	8	26.25	-3	3.5	0.291667	6.5
WRM3	2015-03-30	67	WR	Warm	Rising	rising	cold2	0.455556	0.00185185	1	22	28	6	26.3125	-3	3.5	0.291667	6.5
WRM3	2015-03-31	68	WR	Warm	Rising	rising	cold2	0.457407	0.00185185	1	23	26.5	3.5	24.75	-3	3.5	0.291667	6.5
WRM3	2015-04-01	69	WR	Warm	Rising	rising	cold2	0.459259	0.00185185	1	25.5	28.5	3	26.875	-3	3.5	0.291667	6.5
WRM3	2015-04-02	70	WR	Warm	Rising	rising	cold2	0.461111	0.00185185	1	26	28	2	27.3125	-3	3.5	0.291667	6.5
WRM3	2015-04-03	71	WR	Warm	Rising	rising	cold2	0.462963	0.00185185	1	26	29	3	27.3125	-3	3.5	0.333333	6.5
WRM3	2015-04-04	72	WR	Warm	Rising	rising	cold2	0.464815	0.00185185	1	26.5	28	1.5	27.3125	-3	3.5	0.333333	6.5
WRM3	2015-04-05	73	WR	Warm	Rising	rising	cold2	0.466667	0.00185185	1	25	28.5	3.5	26.8125	-3	3.5	0.333333	6.5
WRM3	2015-04-06	74	WR	Warm	Rising	rising	cold2	0.468519	0.00185185	1	26.5	29.5	3	27.75	-3	3.5	0.333333	6.5
WRM3	2015-04-07	75	WR	Warm	Rising	rising	cold2	0.47037	0.00185185	1	26	28	2	27.1875	-3	3.5	0.375	6.5
WRP1	2015-01-26	4	WR	Warm	Rising	rising	cold	0.338889	0.00185185	1	24	29.5	5.5	26	-2	3	1.04167	5
WRP1	2015-01-27	5	WR	Warm	Rising	rising	cold	0.340741	0.00185185	1	22	27.5	5.5	24.75	-3	3.5	0	6.5
WRP1	2015-01-28	6	WR	Warm	Rising	rising	cold	0.342593	0.00185185	1	23	29.5	6.5	24.5625	-3	3.5	-0.0416667	6.5
WRP1	2015-01-29	7	WR	Warm	Rising	rising	cold	0.344444	0.00185185	1	23.5	32.5	9	27.125	-3	3.5	-0.0416667	6.5
WRP1	2015-01-30	8	WR	Warm	Rising	rising	cold	0.346296	0.00185185	1	22.5	30.5	8	24.8125	-3	3.5	0	6.5
WRP1	2015-01-31	9	WR	Warm	Rising	rising	cold	0.348148	0.00185185	1	22.5	30.5	8	25.625	-3	3.5	-0.0416667	6.5
WRP1	2015-02-01	10	WR	Warm	Rising	rising	cold	0.35	0.00185185	1	22.5	32.5	10	26.25	-3	3.5	-0.0416667	6.5
WRP1	2015-02-02	11	WR	Warm	Rising	rising	cold	0.351852	0.00185185	1	23	27.5	4.5	24.9375	-3	3.5	-0.0416667	6.5
WRP1	2015-02-03	12	WR	Warm	Rising	rising	cold	0.353704	0.00185185	1	23.5	33	9.5	28.0625	-3	3.5	0	6.5
WRP1	2015-02-04	13	WR	Warm	Rising	rising	cold	0.355556	0.00185185	1	25.5	30	4.5	27.8125	-3	3.5	0	6.5
WRP1	2015-02-05	14	WR	Warm	Rising	rising	cold	0.357407	0.00185185	1	24	31	7	28.125	-3	3.5	0	6.5
WRP1	2015-02-06	15	WR	Warm	Rising	rising	cold	0.359259	0.00185185	1	27	33	6	30.0625	-3	3.5	-0.0416667	6.5
WRP1	2015-02-07	16	WR	Warm	Rising	rising	cold	0.361111	0.00185185	1	25.5	32	6.5	28.1875	-3	3.5	-0.0416667	6.5
WRP1	2015-02-08	17	WR	Warm	Rising	rising	cold	0.362963	0.00185185	1	24.5	30	5.5	27.25	-3	3.5	-0.0416667	6.5
WRP1	2015-02-09	18	WR	Warm	Rising	rising	cold	0.364815	0.00185185	1	27	32	5	29.8125	-3	3.5	0	6.5
WRP1	2015-02-10	19	WR	Warm	Rising	rising	cold	0.366667	0.00185185	1	25.5	32	6.5	29.75	-3	3.5	0	6.5
WRP1	2015-02-11	20	WR	Warm	Rising	rising	cold	0.368519	0.00185185	1	25.5	32	6.5	29.375	-3	3.5	0	6.5
WRP1	2015-02-12	21	WR	Warm	Rising	rising	cold	0.37037	0.00185185	1	27	30.5	3.5	28.875	-3	3.5	0	6.5
WRP1	2015-02-13	22	WR	Warm	Rising	rising	cold	0.372222	0.00185185	1	26	30.5	4.5	28.5625	-3	3.5	0	6.5
WRP1	2015-02-14	23	WR	Warm	Rising	rising	cold	0.374074	0.00185185	1	25.5	29.5	4	28	-3	3.5	0	6.5
WRP1	2015-02-15	24	WR	Warm	Rising	rising	cold	0.375926	0.00185185	1	26	31	5	28.625	-3	3.5	0	6.5
WRP1	2015-02-16	25	WR	Warm	Rising	rising	cold	0.377778	0.00185185	1	25	31	6	27.875	-3	3.5	0	6.5
WRP1	2015-02-17	26	WR	Warm	Rising	rising	cold	0.37963	0.00185185	1	24.5	31.5	7	26.8125	-3	3.5	0	6.5
WRP1	2015-02-18	27	WR	Warm	Rising	rising	cold	0.381481	0.00185185	1	25	31	6	28.125	-3	3.5	0.0416667	6.5
WRP1	2015-02-19	28	WR	Warm	Rising	rising	cold	0.383333	0.00185185	1	24.5	29	4.5	27	-3	3.5	0.0416667	6.5
WRP1	2015-02-20	29	WR	Warm	Rising	rising	cold	0.385185	0.00185185	1	25.5	32	6.5	28.9375	-3	3.5	0.0833333	6.5
WRP1	2015-02-21	30	WR	Warm	Rising	rising	cold	0.387037	0.00185185	1	25.5	30	4.5	27.8125	-3	3.5	0.166667	6.5
WRP1	2015-02-22	31	WR	Warm	Rising	rising	warm	0.388889	0.00185185	1	25.5	28.5	3	27.125	-3	4.5	0.833333	7.5
WRP1	2015-02-23	32	WR	Warm	Rising	rising	warm	0.390741	0.00185185	1	24.5	31.5	7	27.5625	-2	5.5	1.70833	7.5
WRP1	2015-02-24	33	WR	Warm	Rising	rising	warm	0.392593	0.00185185	1	26.5	28.5	2	27.0625	-1	6.5	2.70833	7.5
WRP1	2015-02-25	34	WR	Warm	Rising	rising	warm	0.394444	0.00185185	1	26	27.5	1.5	26.5	0	7.5	3.70833	7.5
WRP1	2015-02-26	35	WR	Warm	Rising	rising	warm	0.396296	0.00185185	1	25.5	31.5	6	28.6875	1	8.5	4.70833	7.5
WRP1	2015-02-27	36	WR	Warm	Rising	rising	warm	0.398148	0.00185185	1	27	29.5	2.5	28.5	2	10	5.79167	8
WRP1	2015-02-28	37	WR	Warm	Rising	rising	warm	0.4	0.00185185	1	27	30	3	28.5	3	10.5	6.70833	7.5
WRP1	2015-03-01	38	WR	Warm	Rising	rising	warm	0.401852	0.00185185	1	26	31	5	28.5	1.5	14.5	7.625	13
WRP1	2015-03-02	39	WR	Warm	Rising	rising	warm	0.403704	0.00185185	1	29	31	2	29.8125	-0.5	13	8.83333	13.5
WRP1	2015-03-03	40	WR	Warm	Rising	rising	warm	0.405556	0.00185185	1	28	30	2	29.25	6	14.5	10	8.5
WRP1	2015-03-04	41	WR	Warm	Rising	rising	warm	0.407407	0.00185185	1	28.5	30.5	2	29.5625	7	15	10.5	8
WRP1	2015-03-05	42	WR	Warm	Rising	rising	warm	0.409259	0.00185185	1	28	31	3	29.375	7	14.5	10.375	7.5
WRP1	2015-03-06	43	WR	Warm	Rising	rising	warm	0.411111	0.00185185	1	28	30.5	2.5	29.125	7	16.5	10.5	9.5
WRP1	2015-03-07	44	WR	Warm	Rising	rising	warm	0.412963	0.00185185	1	27.5	30	2.5	28.8125	7	14.5	10.3333	7.5
WRP1	2015-03-08	45	WR	Warm	Rising	rising	warm	0.414815	0.00185185	1	27.5	30	2.5	28.875	7	14.5	10.3333	7.5
WRP1	2015-03-10	47	WR	Warm	Rising	rising	cold2	0.418519	0.00185185	1	27	31.5	4.5	28.6875	-3	3.5	-0.0833333	6.5
WRP1	2015-03-11	48	WR	Warm	Rising	rising	cold2	0.42037	0.00185185	1	26.5	31.5	5	29.1875	-3	3.5	0	6.5
WRP1	2015-03-12	49	WR	Warm	Rising	rising	cold2	0.422222	0.00185185	1	26.5	30.5	4	28.3125	-3	3.5	0.0833333	6.5
WRP1	2015-03-13	50	WR	Warm	Rising	rising	cold2	0.424074	0.00185185	1	27.5	30.5	3	28.375	-3	3.5	0.0833333	6.5
WRP1	2015-03-14	51	WR	Warm	Rising	rising	cold2	0.425926	0.00185185	1	26.5	31	4.5	28.3125	-3	3.5	0.0833333	6.5
WRP1	2015-03-15	52	WR	Warm	Rising	rising	cold2	0.427778	0.00185185	1	26.5	30	3.5	28.1875	-3	3.5	0.0833333	6.5
WRP1	2015-03-16	53	WR	Warm	Rising	rising	cold2	0.42963	0.00185185	1	27	31	4	29	-3	3.5	0.0833333	6.5
WRP1	2015-03-17	54	WR	Warm	Rising	rising	cold2	0.431481	0.00185185	1	26.5	29.5	3	28.0625	-3	3.5	0.125	6.5
WRP1	2015-03-18	55	WR	Warm	Rising	rising	cold2	0.433333	0.00185185	1	26	31	5	28.25	-3	3.5	0.125	6.5
WRP1	2015-03-19	56	WR	Warm	Rising	rising	cold2	0.435185	0.00185185	1	27	29	2	28.125	-3	3.5	0.125	6.5
WRP1	2015-03-20	57	WR	Warm	Rising	rising	cold2	0.437037	0.00185185	1	26.5	31.5	5	28.25	-3	3.5	0.125	6.5
WRP1	2015-03-21	58	WR	Warm	Rising	rising	cold2	0.438889	0.00185185	1	24.5	28	3.5	26.125	-3	3.5	0.125	6.5
WRP1	2015-03-22	59	WR	Warm	Rising	rising	cold2	0.440741	0.00185185	1	25	31.5	6.5	28	-3	3.5	0.166667	6.5
WRP1	2015-03-23	60	WR	Warm	Rising	rising	cold2	0.442593	0.00185185	1	24.5	28	3.5	26.1875	-3	3.5	0.125	6.5
WRP1	2015-03-24	61	WR	Warm	Rising	rising	cold2	0.444444	0.00185185	1	24.5	31	6.5	27.3125	-3	3.5	0.166667	6.5
WRP1	2015-03-25	62	WR	Warm	Rising	rising	cold2	0.446296	0.00185185	1	24.5	27.5	3	26	-3	3.5	0.208333	6.5
WRP1	2015-03-26	63	WR	Warm	Rising	rising	cold2	0.448148	0.00185185	1	23.5	28.5	5	26.0625	-3	4	0.25	7
WRP1	2015-03-27	64	WR	Warm	Rising	rising	cold2	0.45	0.00185185	1	23.5	28	4.5	25.6875	-3	4	0.25	7
WRP1	2015-03-28	65	WR	Warm	Rising	rising	cold2	0.451852	0.00185185	1	23.5	29.5	6	25.625	-3	4	0.291667	7
WRP1	2015-03-29	66	WR	Warm	Rising	rising	cold2	0.453704	0.00185185	1	23.5	28	4.5	26.1875	-3	4	0.375	7
WRP1	2015-03-30	67	WR	Warm	Rising	rising	cold2	0.455556	0.00185185	1	25	31	6	27.625	-3	4	0.375	7
WRP1	2015-03-31	68	WR	Warm	Rising	rising	cold2	0.457407	0.00185185	1	24	28.5	4.5	26	-3	4	0.375	7
WRP1	2015-04-01	69	WR	Warm	Rising	rising	cold2	0.459259	0.00185185	1	26	32	6	28.5	-3	4	0.416667	7
WRP1	2015-04-02	70	WR	Warm	Rising	rising	cold2	0.461111	0.00185185	1	25	30	5	27.75	-3	4	0.375	7
WRP1	2015-04-03	71	WR	Warm	Rising	rising	cold2	0.462963	0.00185185	1	23.5	31.5	8	26.75	-3	4	0.416667	7
WRP1	2015-04-04	72	WR	Warm	Rising	rising	cold2	0.464815	0.00185185	1	25	31.5	6.5	27.0625	-3	4	0.416667	7
WRP1	2015-04-05	73	WR	Warm	Rising	rising	cold2	0.466667	0.00185185	1	25.5	31.5	6	27.1875	-3	4	0.416667	7
WRP1	2015-04-06	74	WR	Warm	Rising	rising	cold2	0.468519	0.00185185	1	24.5	30.5	6	26.75	-3	4	0.458333	7
WRP1	2015-04-07	75	WR	Warm	Rising	rising	cold2	0.47037	0.00185185	1	25	30.5	5.5	26.75	-3	4	0.458333	7
